# Supplementary material for: SIRT2 regulates extracellular vesicle-mediated liver–bone communication
Source: PubMed Central journal article supplement (PMC10229428; doi:10.1038/s42255-023-00803-0), 2023-05-15

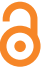

---

# **SIRT2 regulates extracellular vesicle-mediated liver–bone communication**

---

In the format provided by the authors and unedited

**Figure.1a** Western blot analysis of SIRT2 protein expression in primary hepatocytes of aged female and male mice

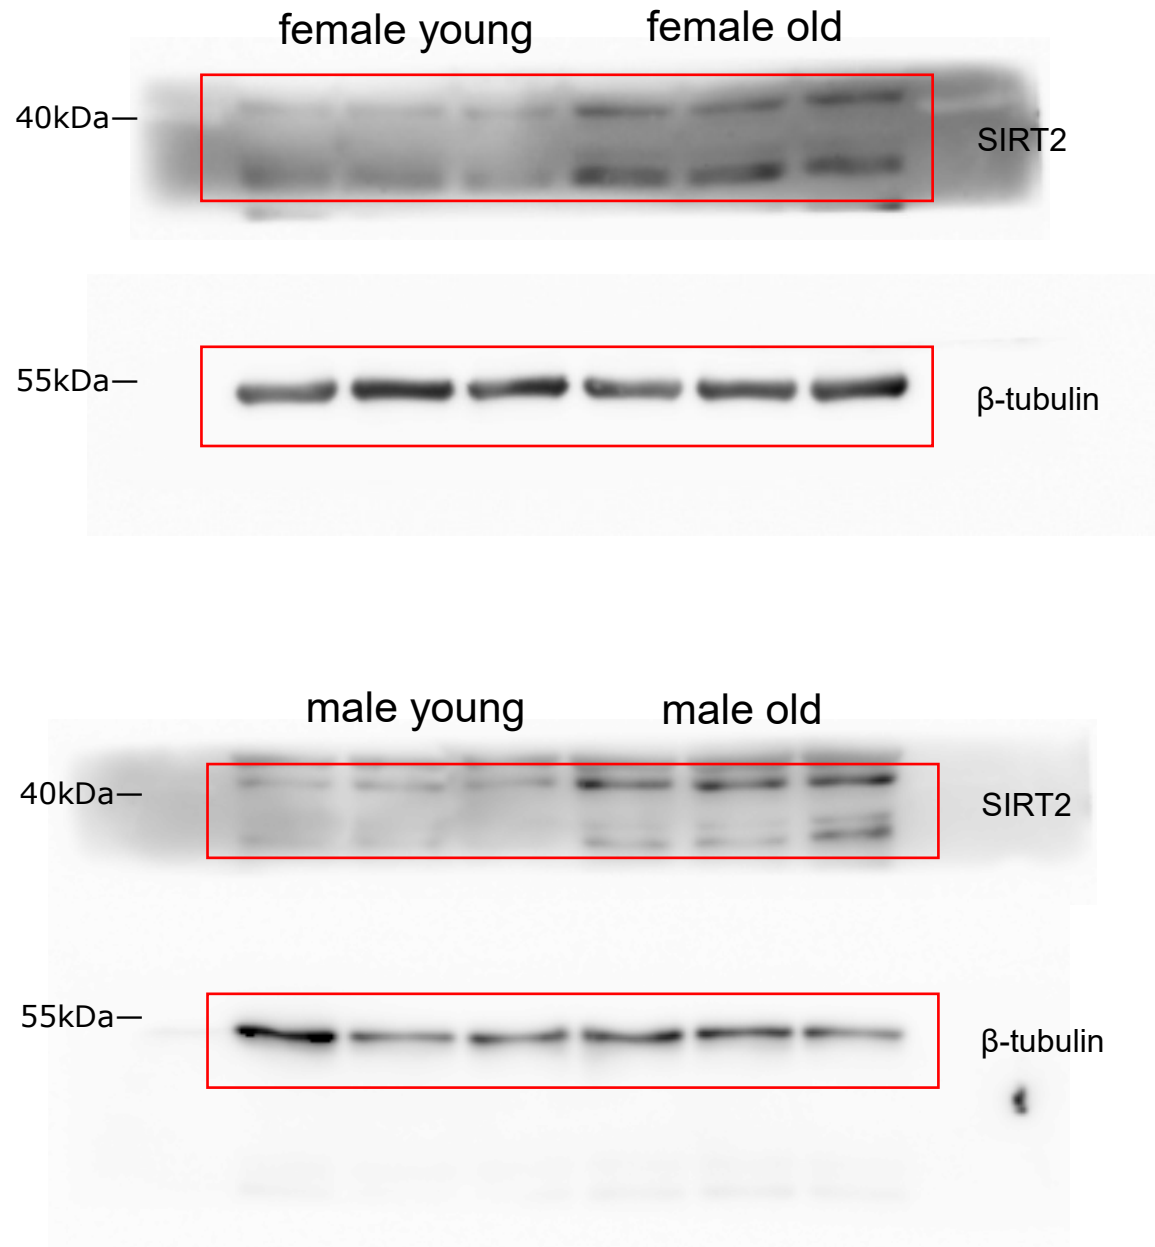

**Figure.1c**

IHC images of SIRT2 protein expression in liver tissues from young and aged mice

female young

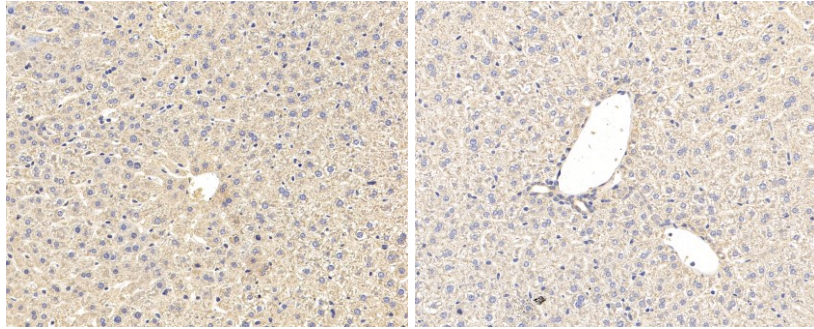

female old

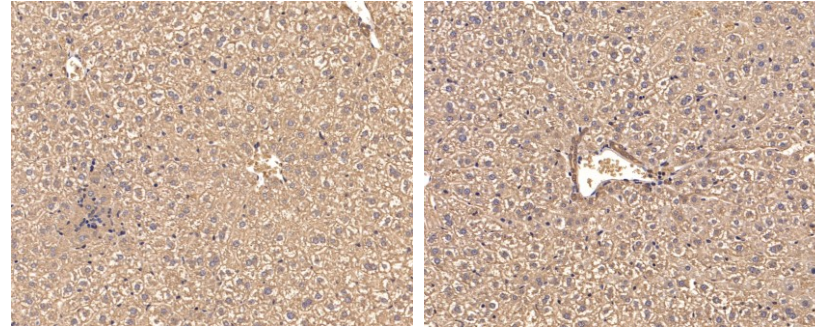

male young

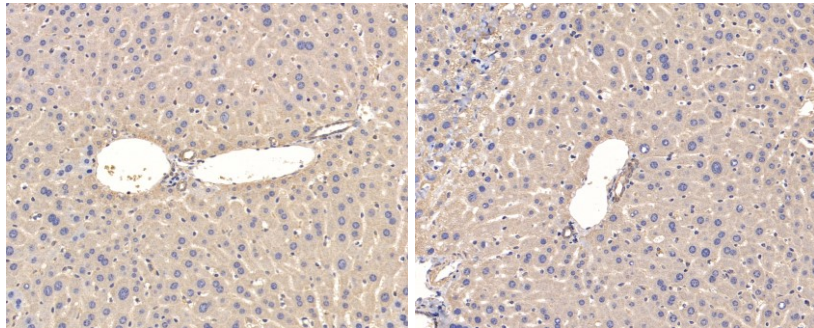

male old

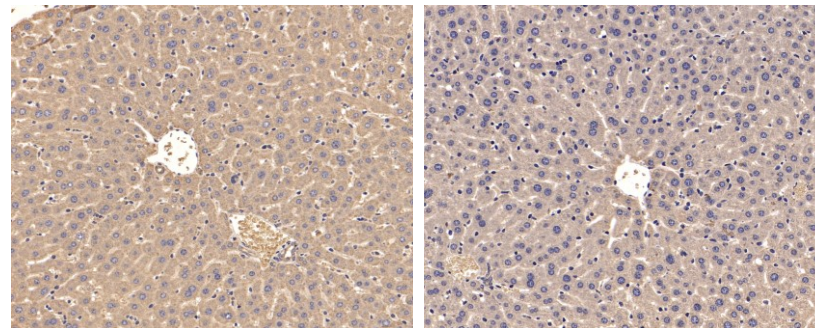

Figure.1e

Aged female Loxp

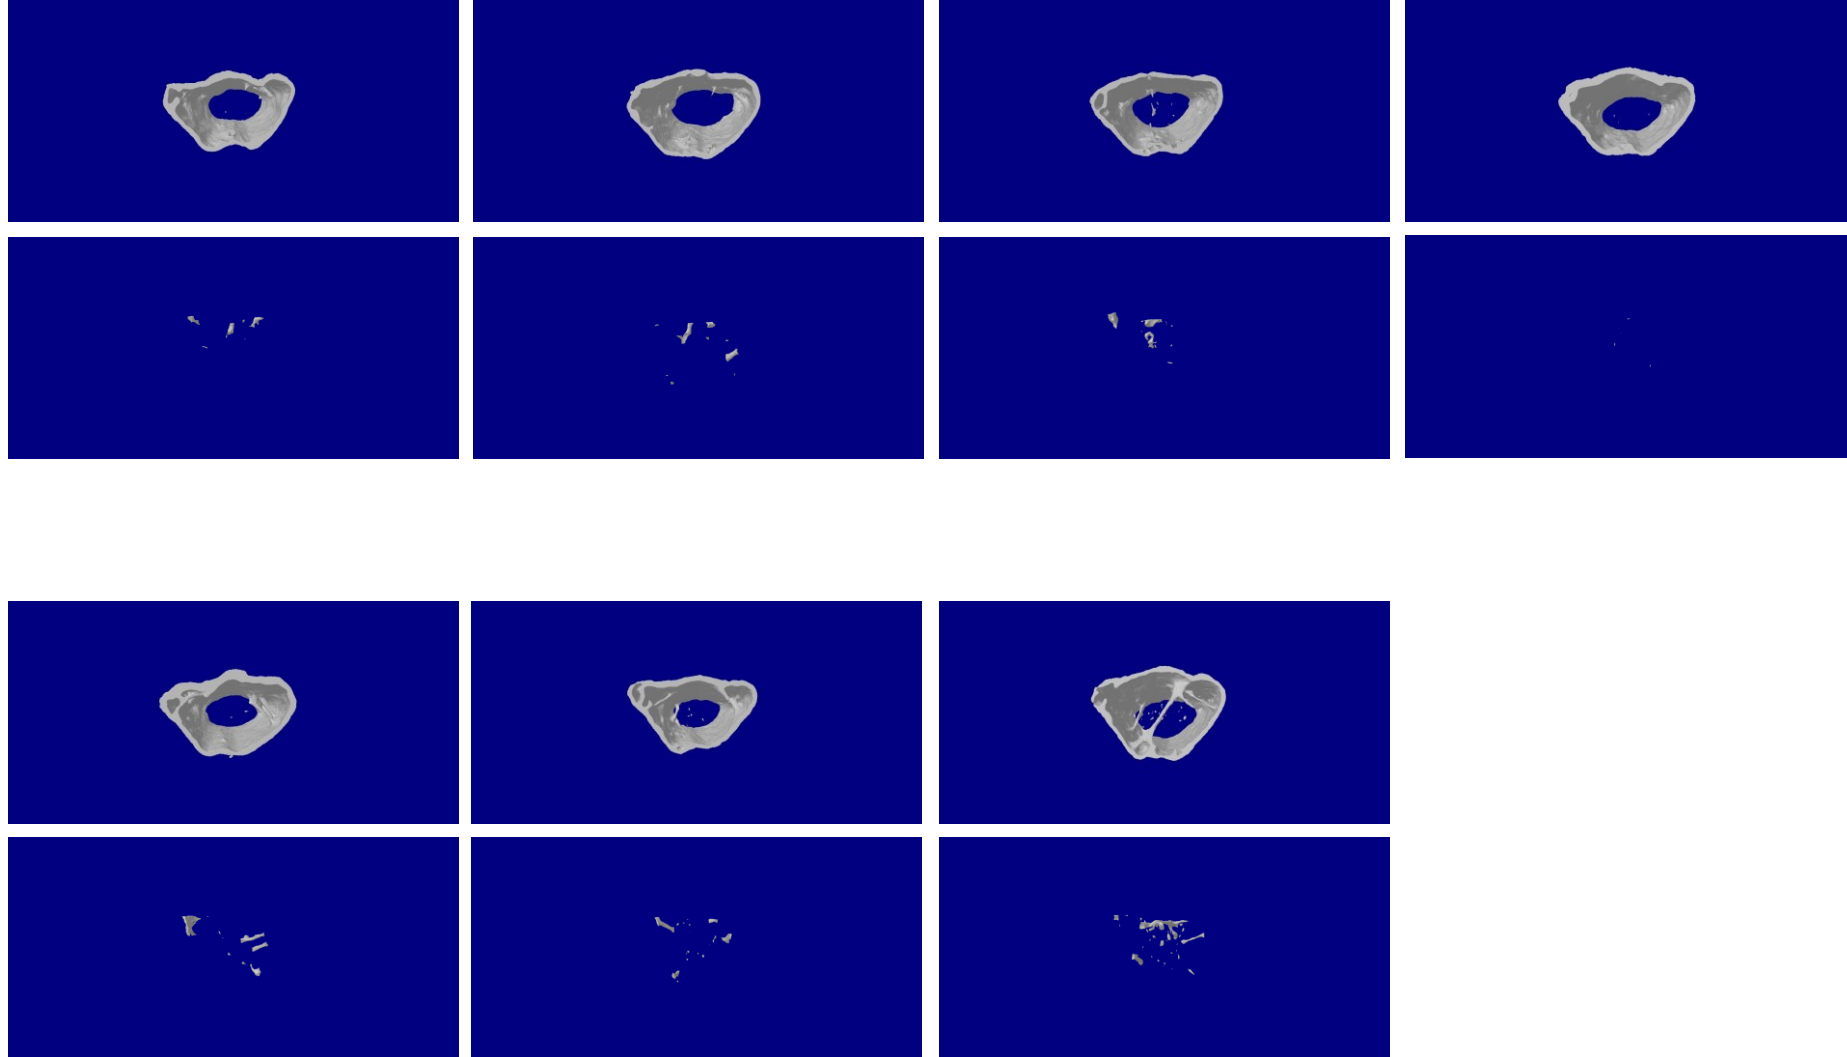

Figure.1e

Aged female *SIRT2-KO*<sup>hep</sup>

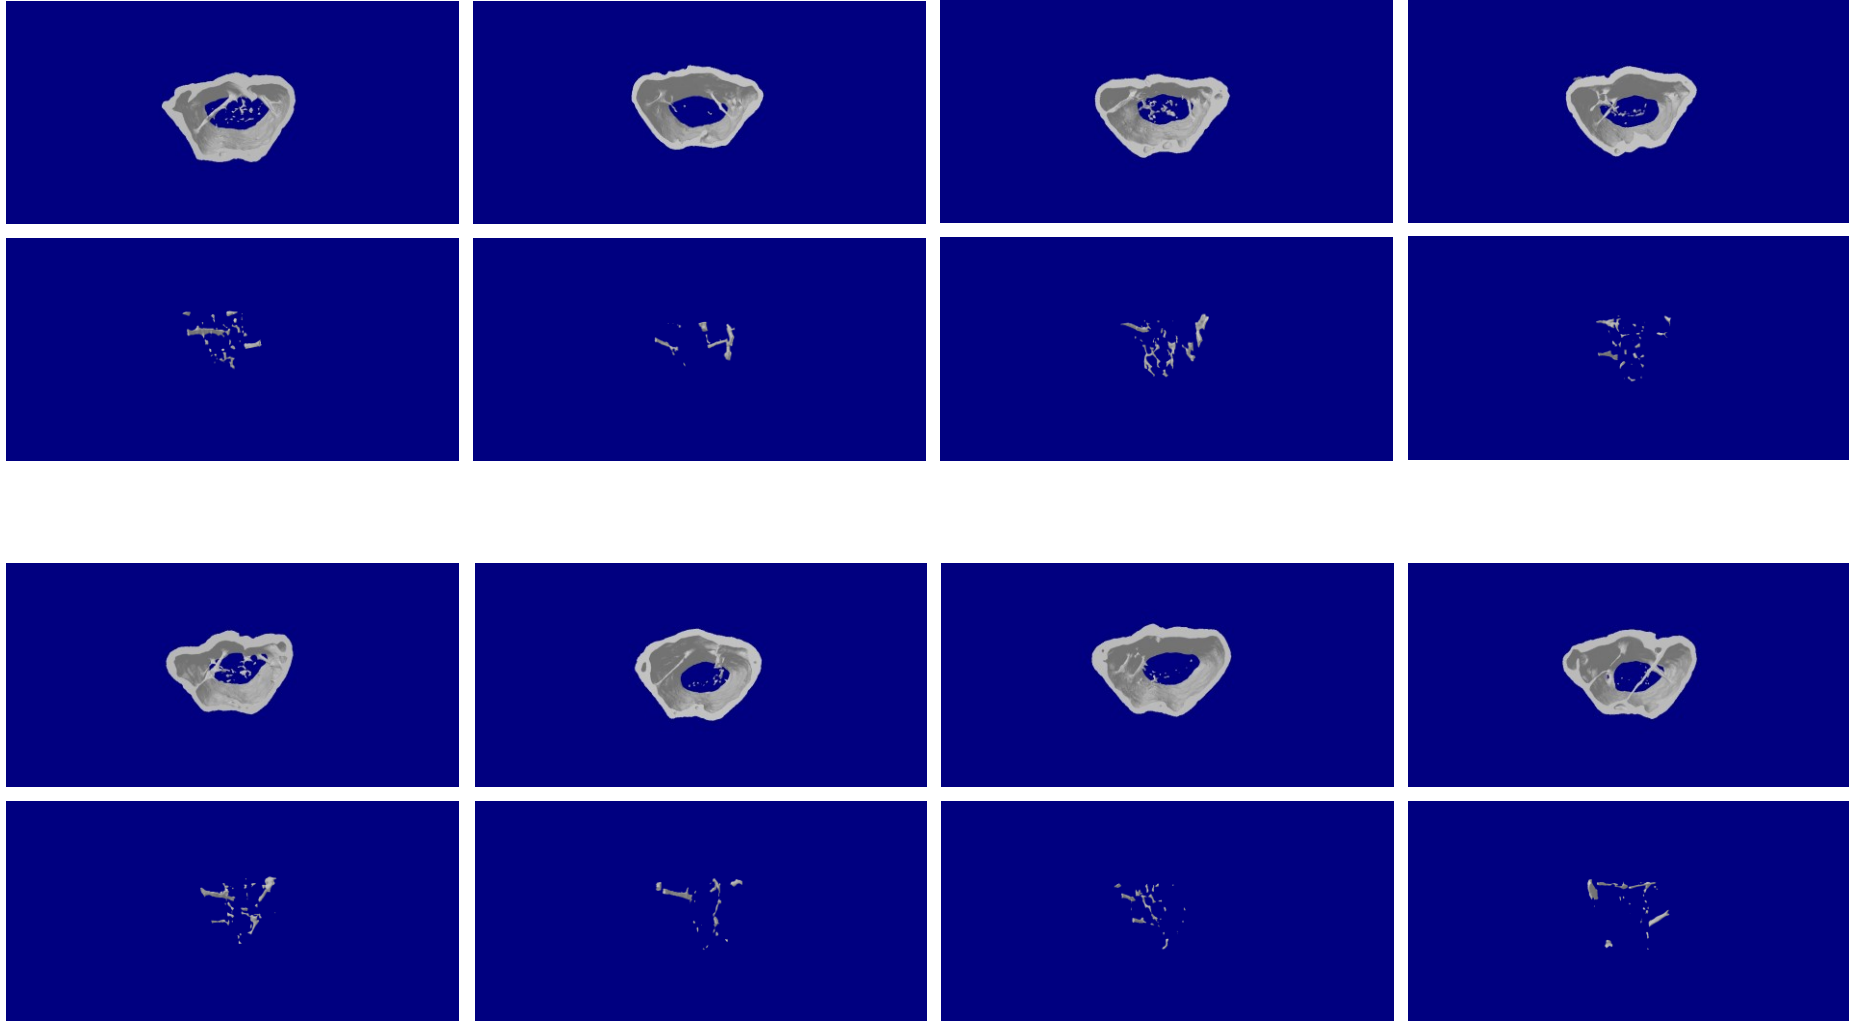

Figure.1g

Aged male Loxp

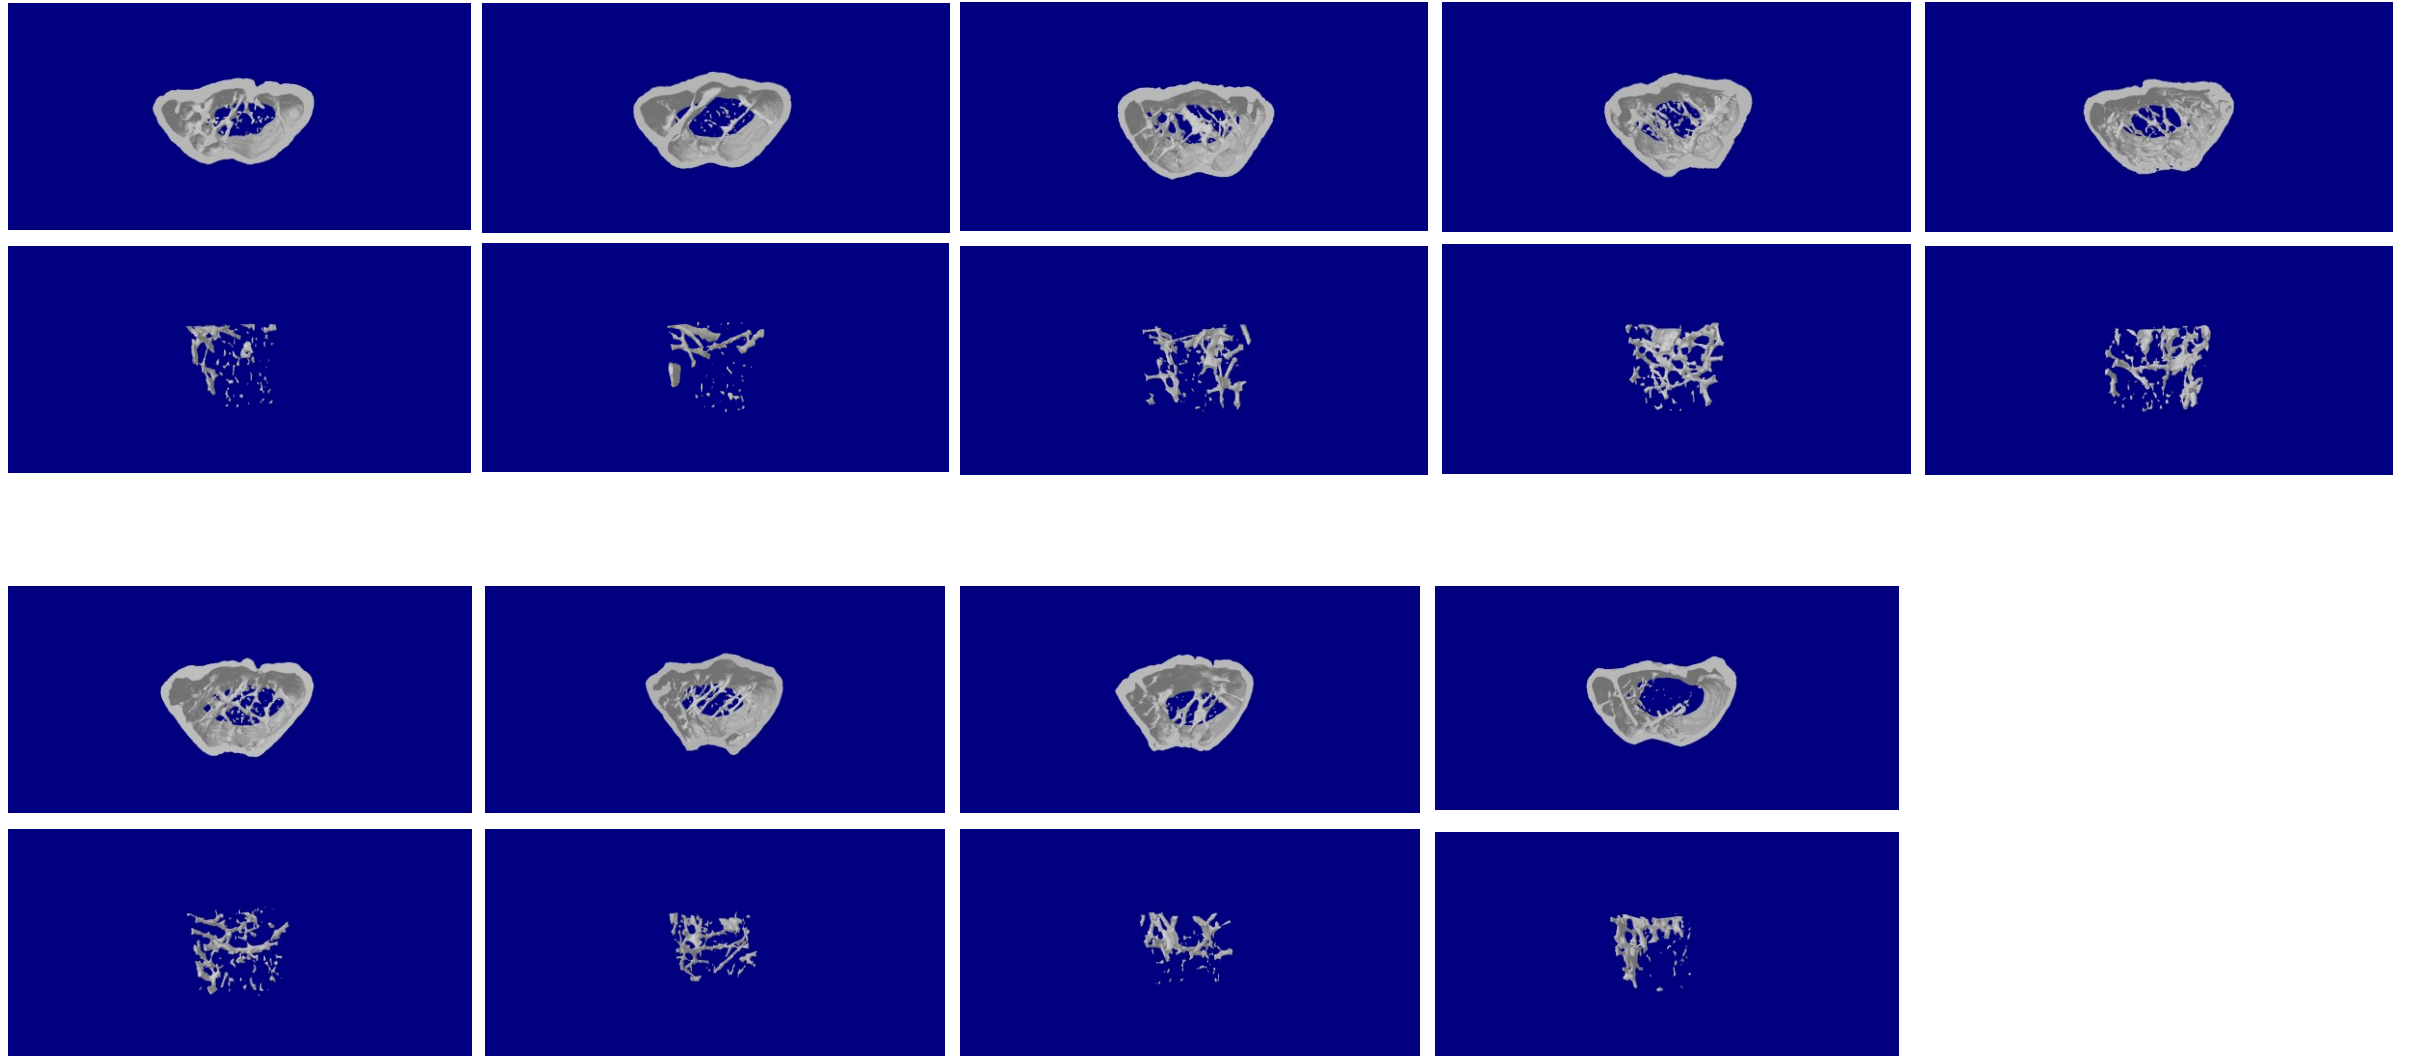

Figure.1g

Aged male *SIRT2-KO*<sup>hep</sup>

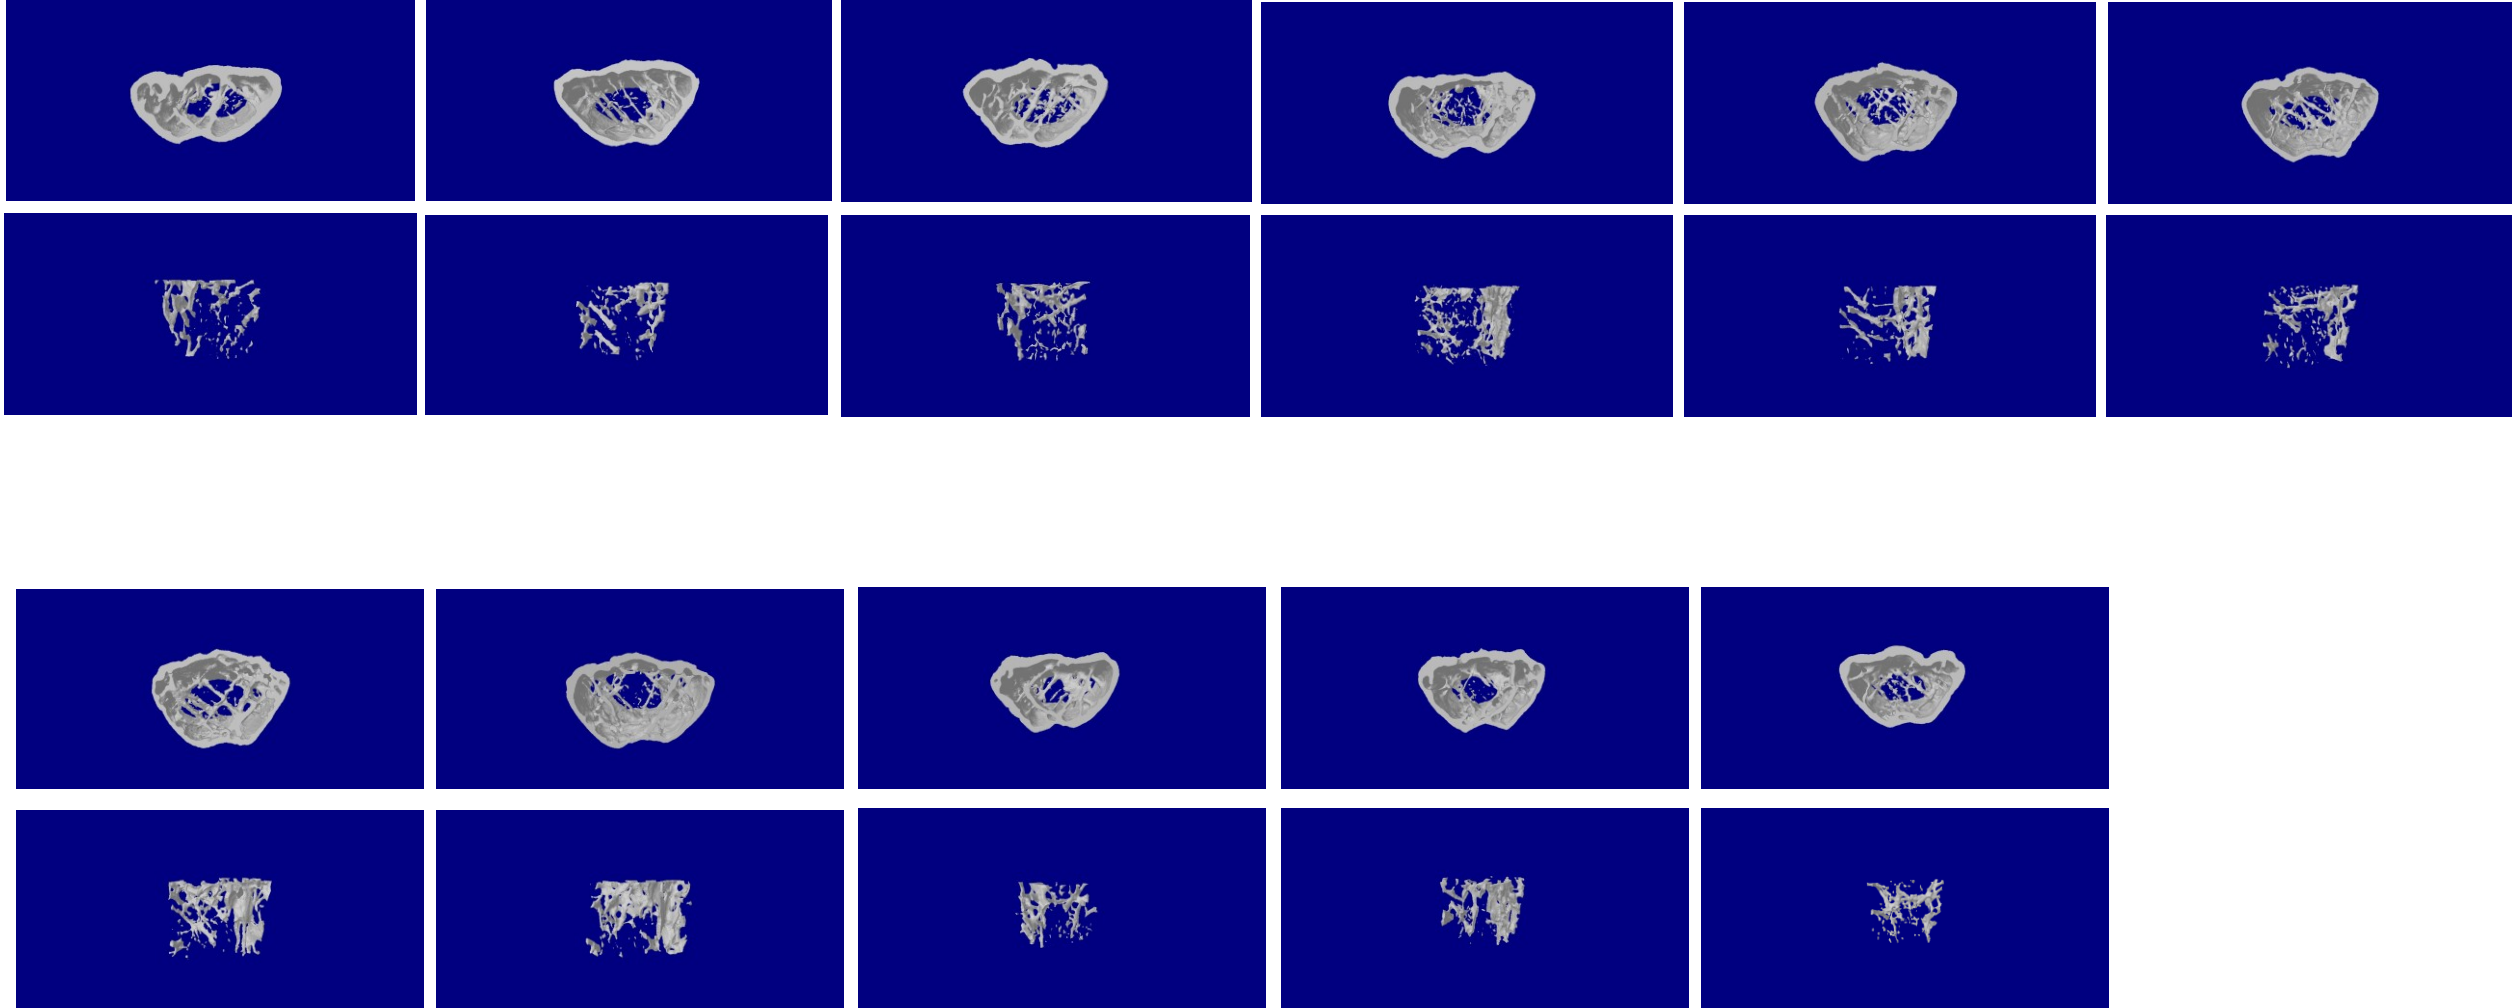

**Figure.1k**

TRAP staining on paraffin-embedded femur sections in aged mice

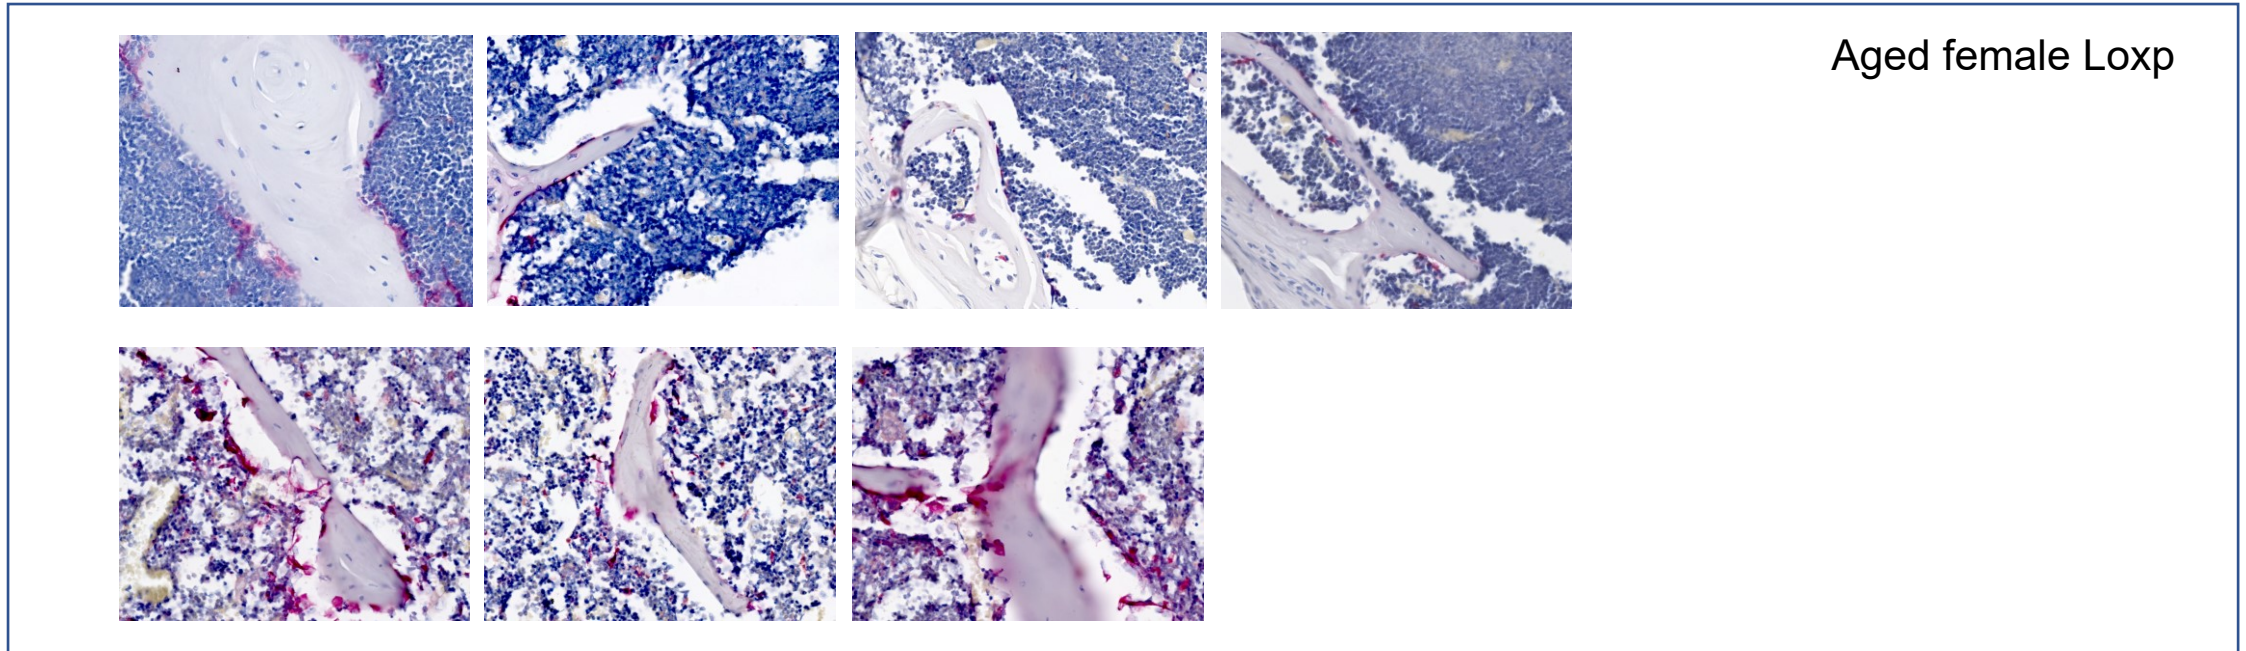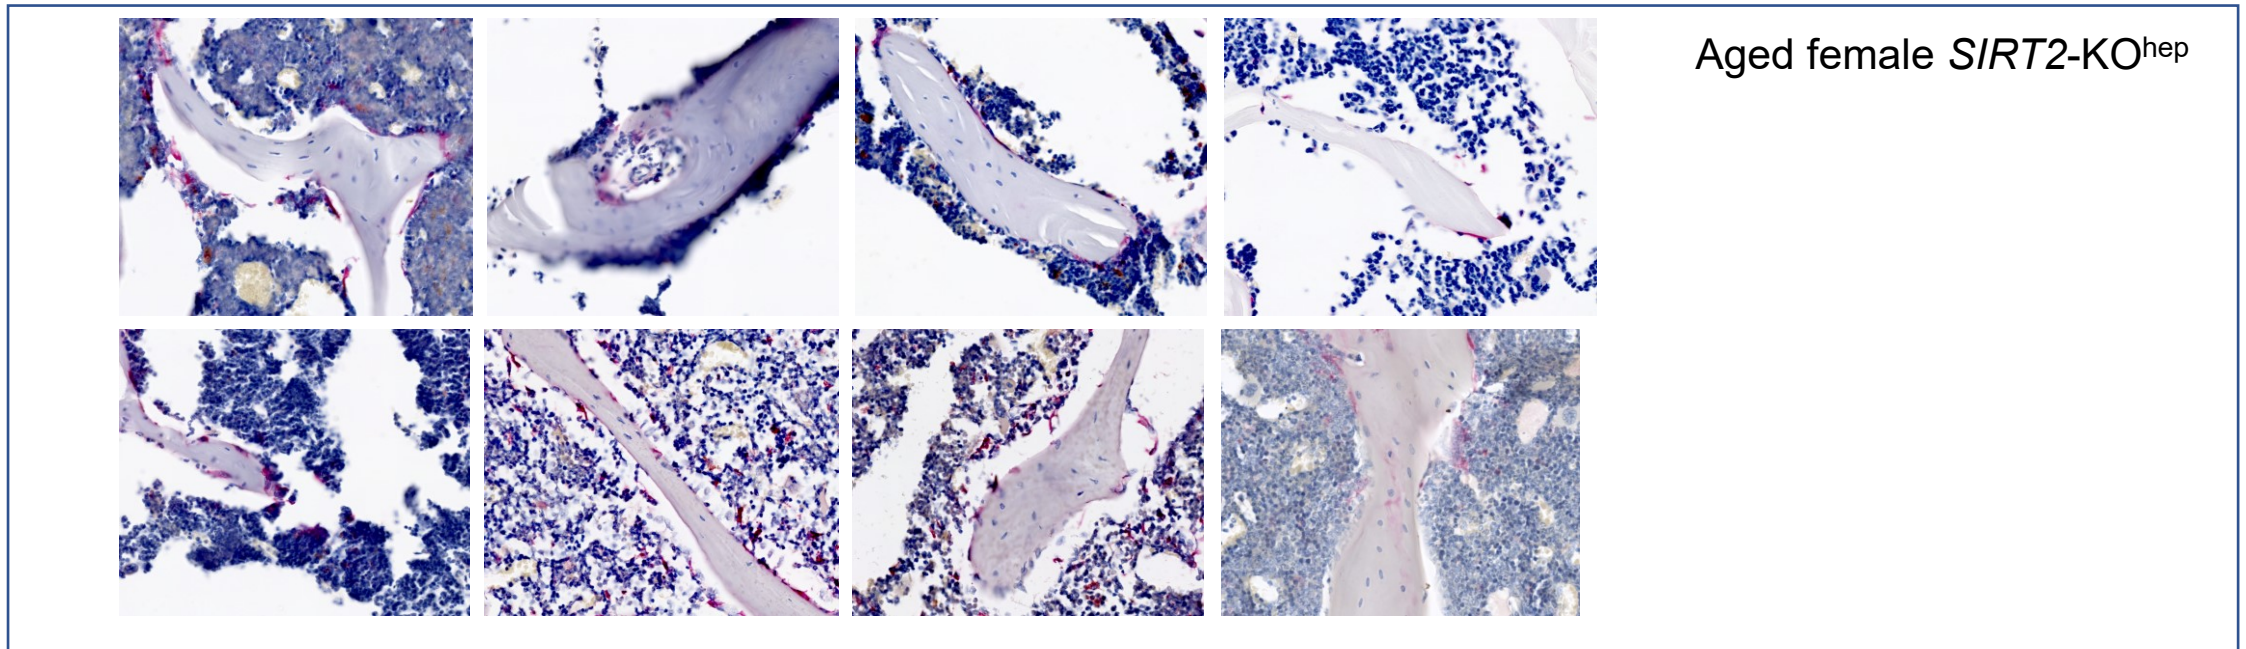



**Figure.1m**

TRAP staining on paraffin-embedded femur sections in aged mice

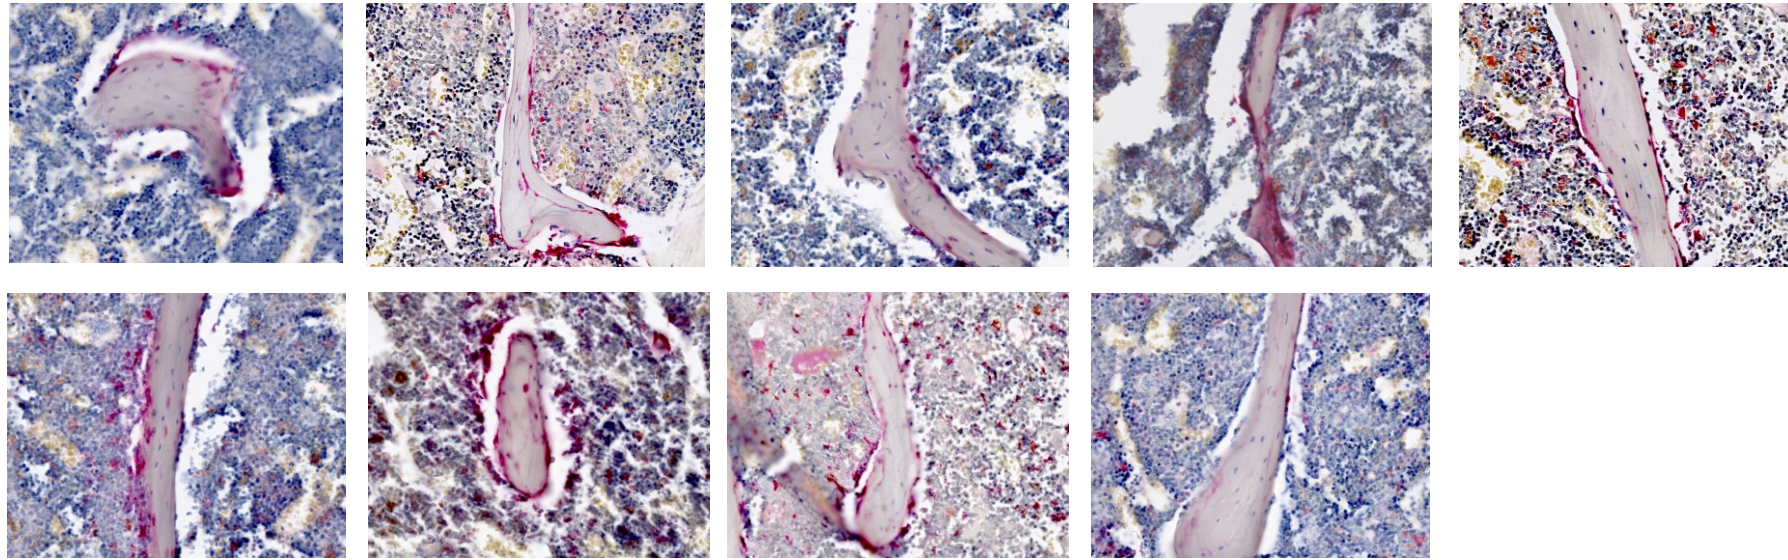

Aged male Loxp

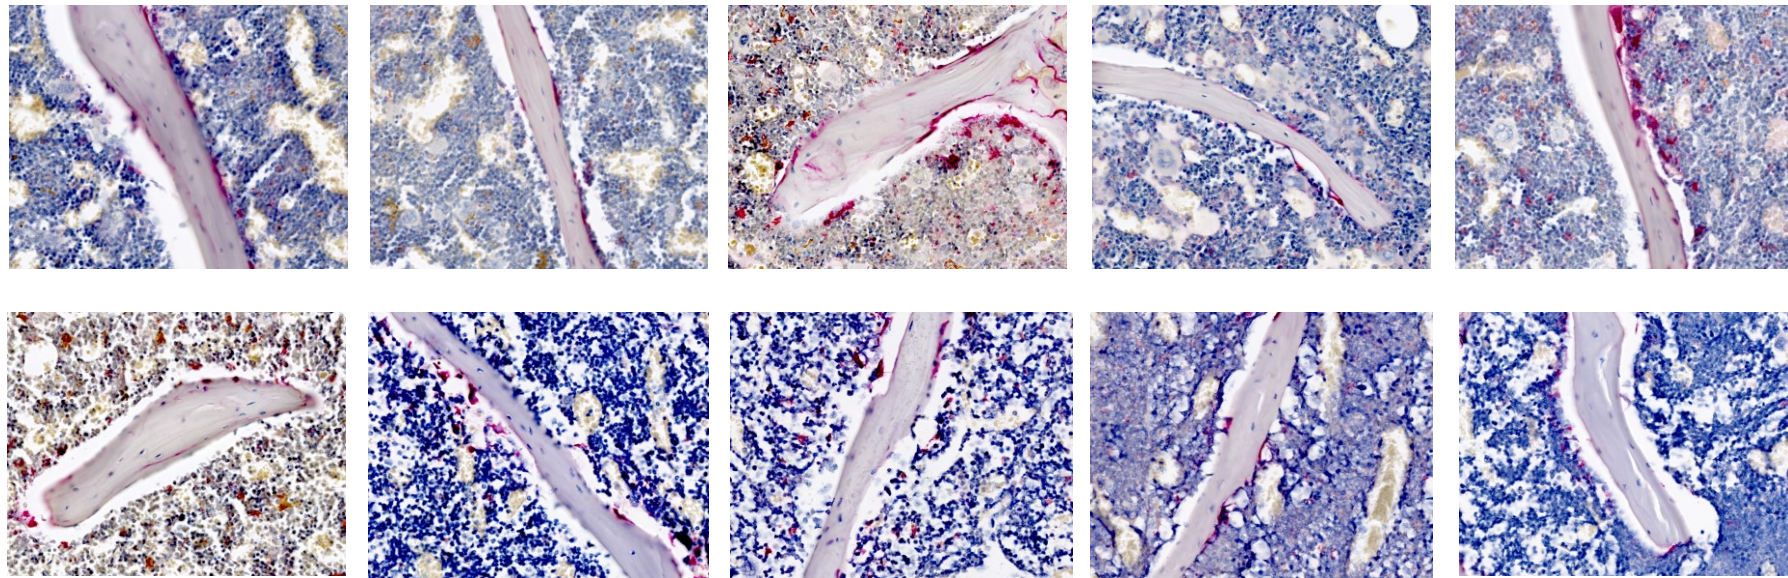

Aged male *SIRT2-KO<sup>hep</sup>*

**Figure.2a**

TRAP staining images of osteoclasts administered with the plasma of aged mice

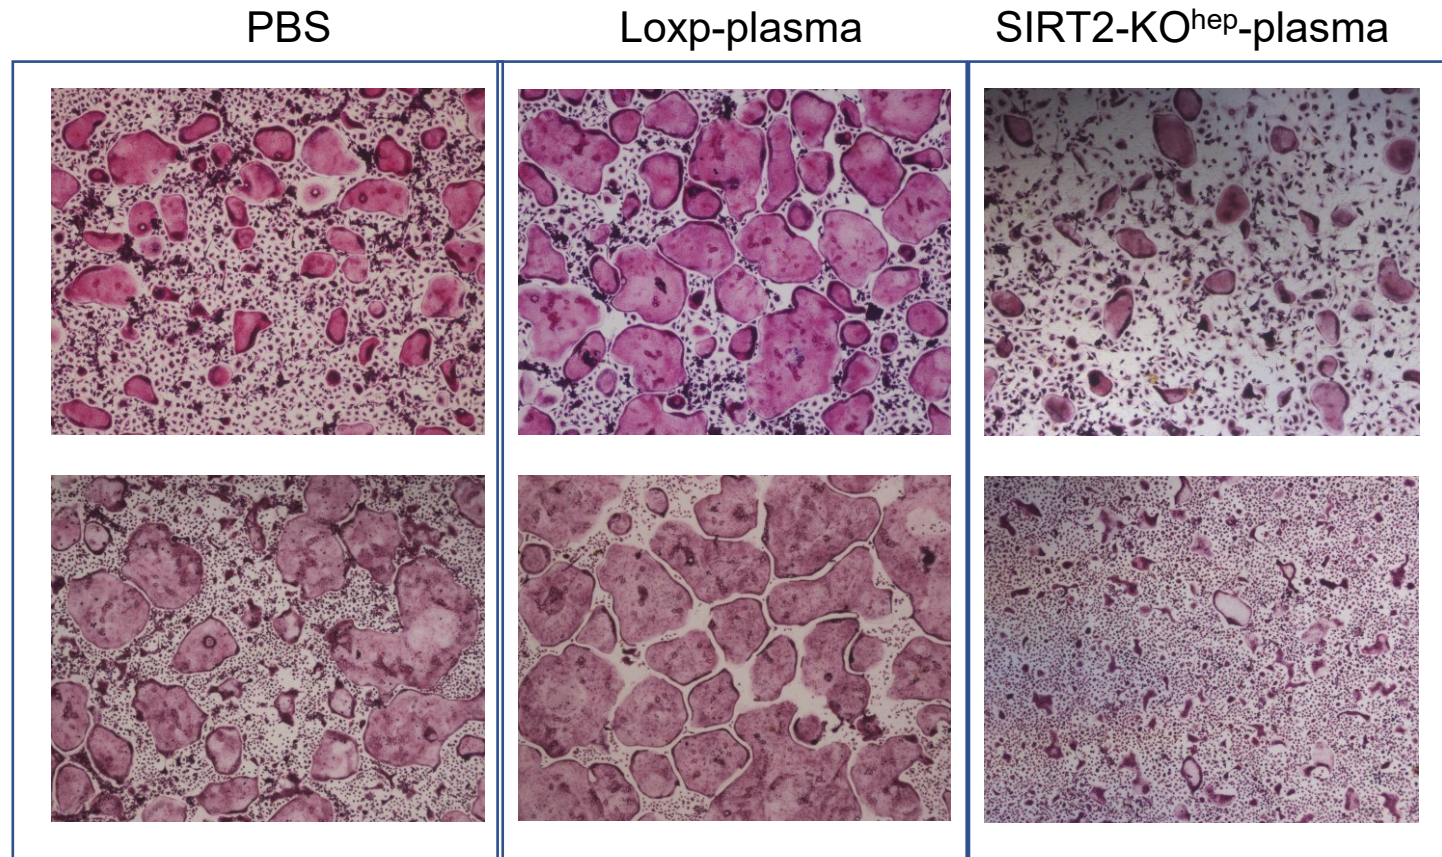

**Figure.2e**

TRAP staining images of osteoclasts treated with the sEVs derived from LoxP or SIRT2-KO<sup>hep</sup> plasma

Loxp-sEVs

SIRT2-KO<sup>hep</sup>-sEVs

SIRT2-KO<sup>hep</sup> plasma(-sEVs)

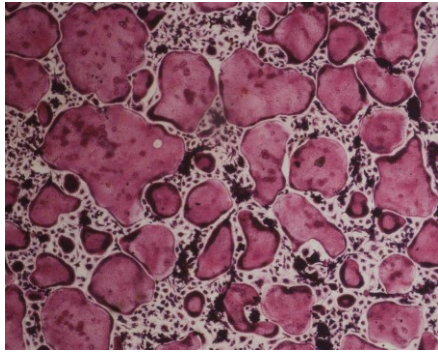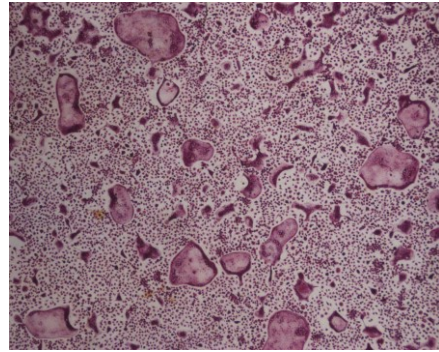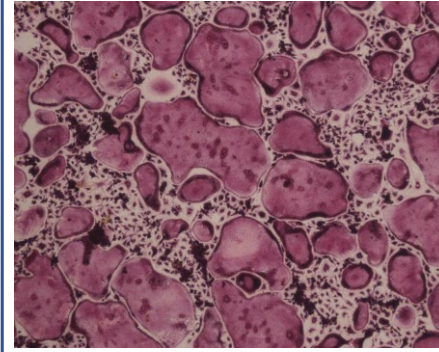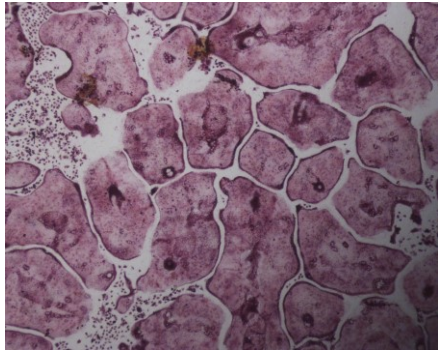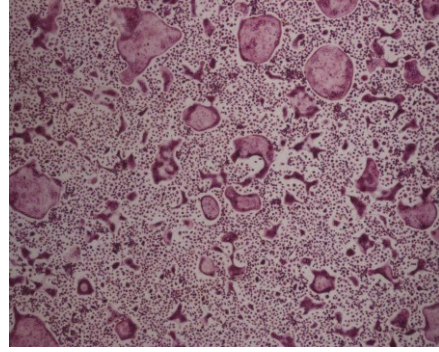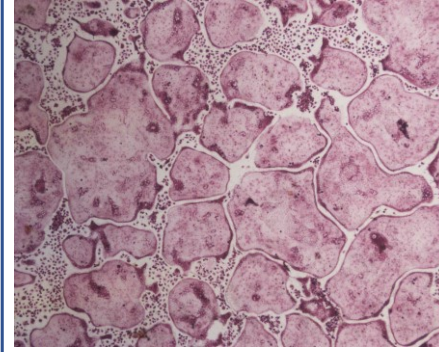

**Figure.2i** TRAP staining of osteoclasts treated with sEVs derived from the medium of the primary hepatocytes of aged female mice

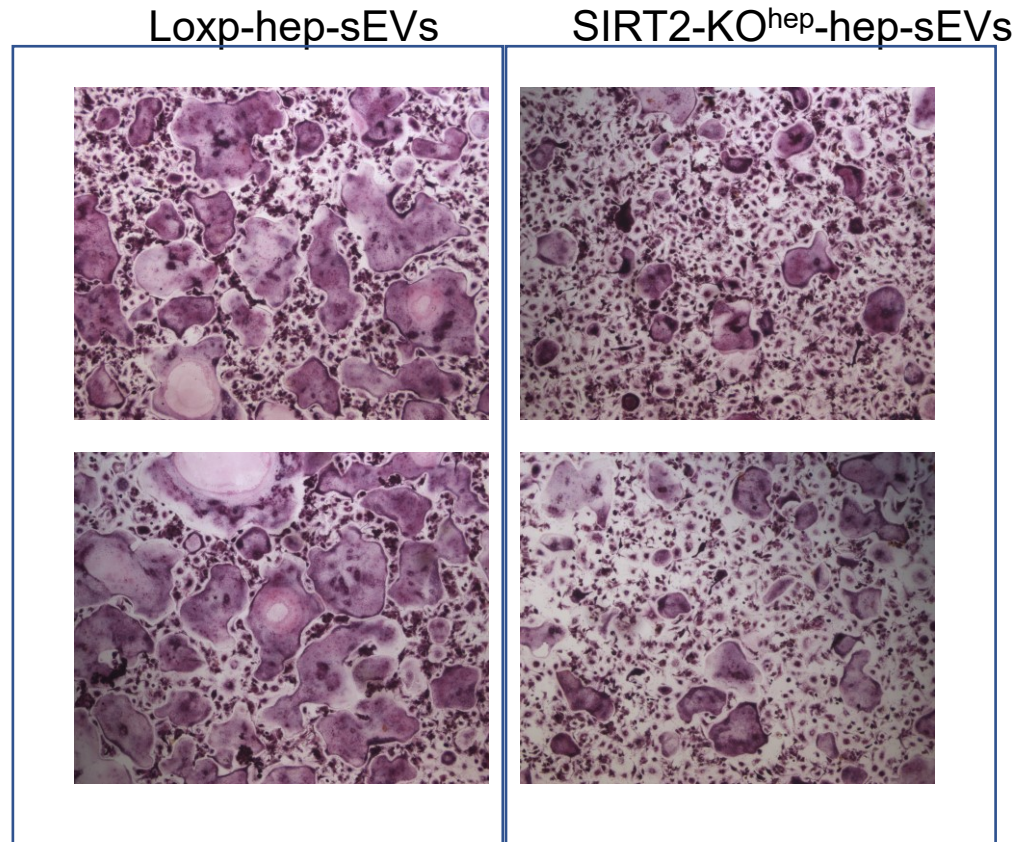

**Figure.2I** TRAP staining of osteoclasts treated with sEVs derived from the medium of the primary hepatocytes of aged male mice

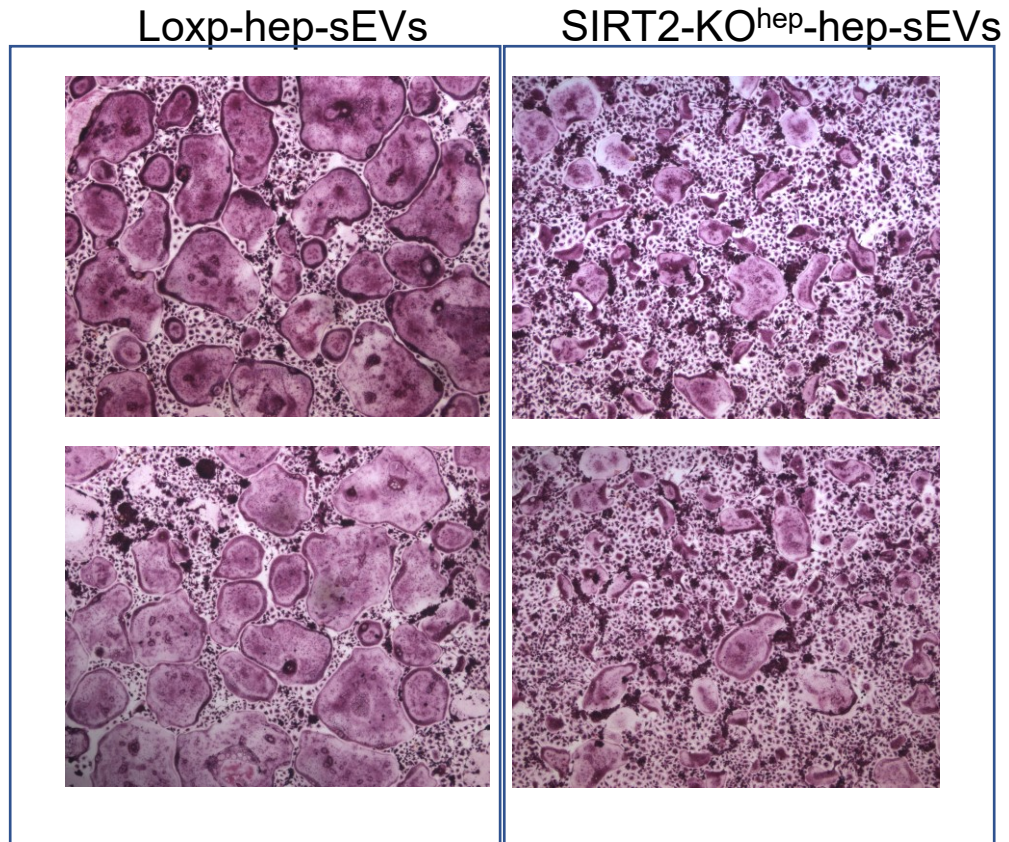

**Figure.3e** immunofluorescence images of murine femurs in aged mice

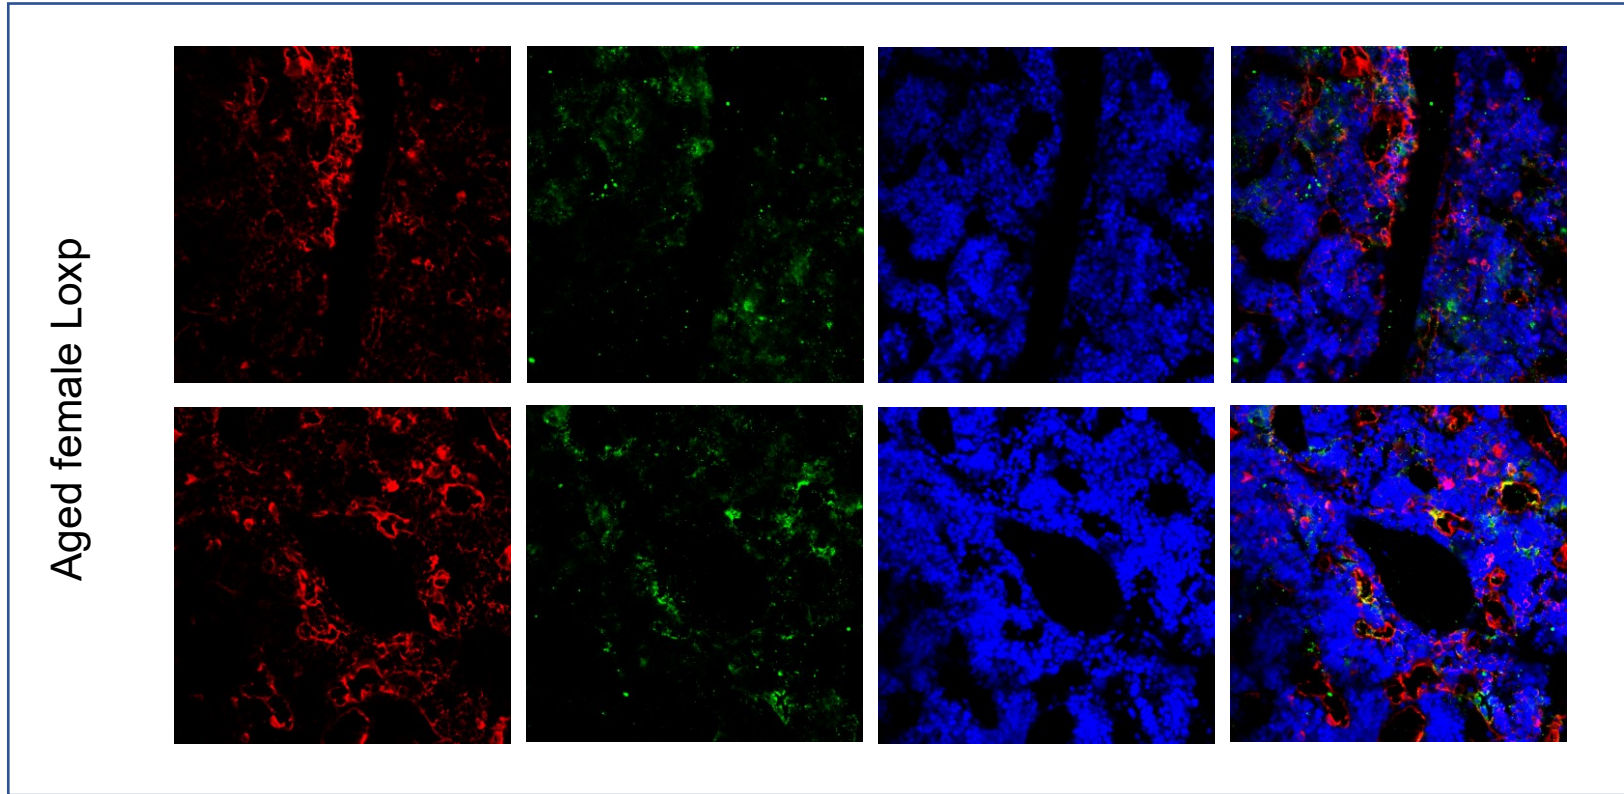

**Figure.3e** immunofluorescence images of murine femurs in aged mice

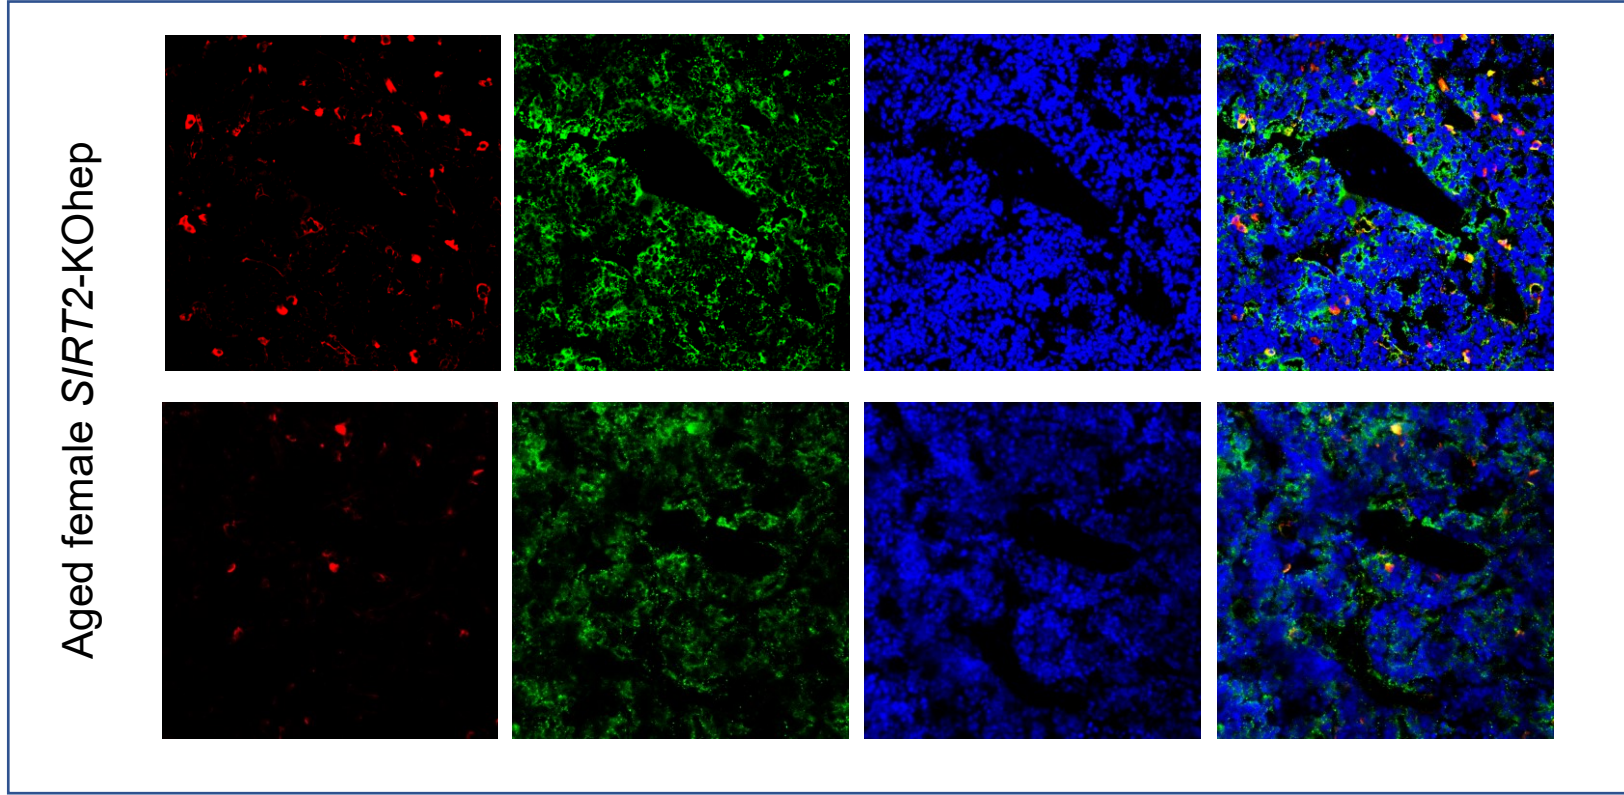

**Figure.3g** immunofluorescence images of murine femurs in aged mice

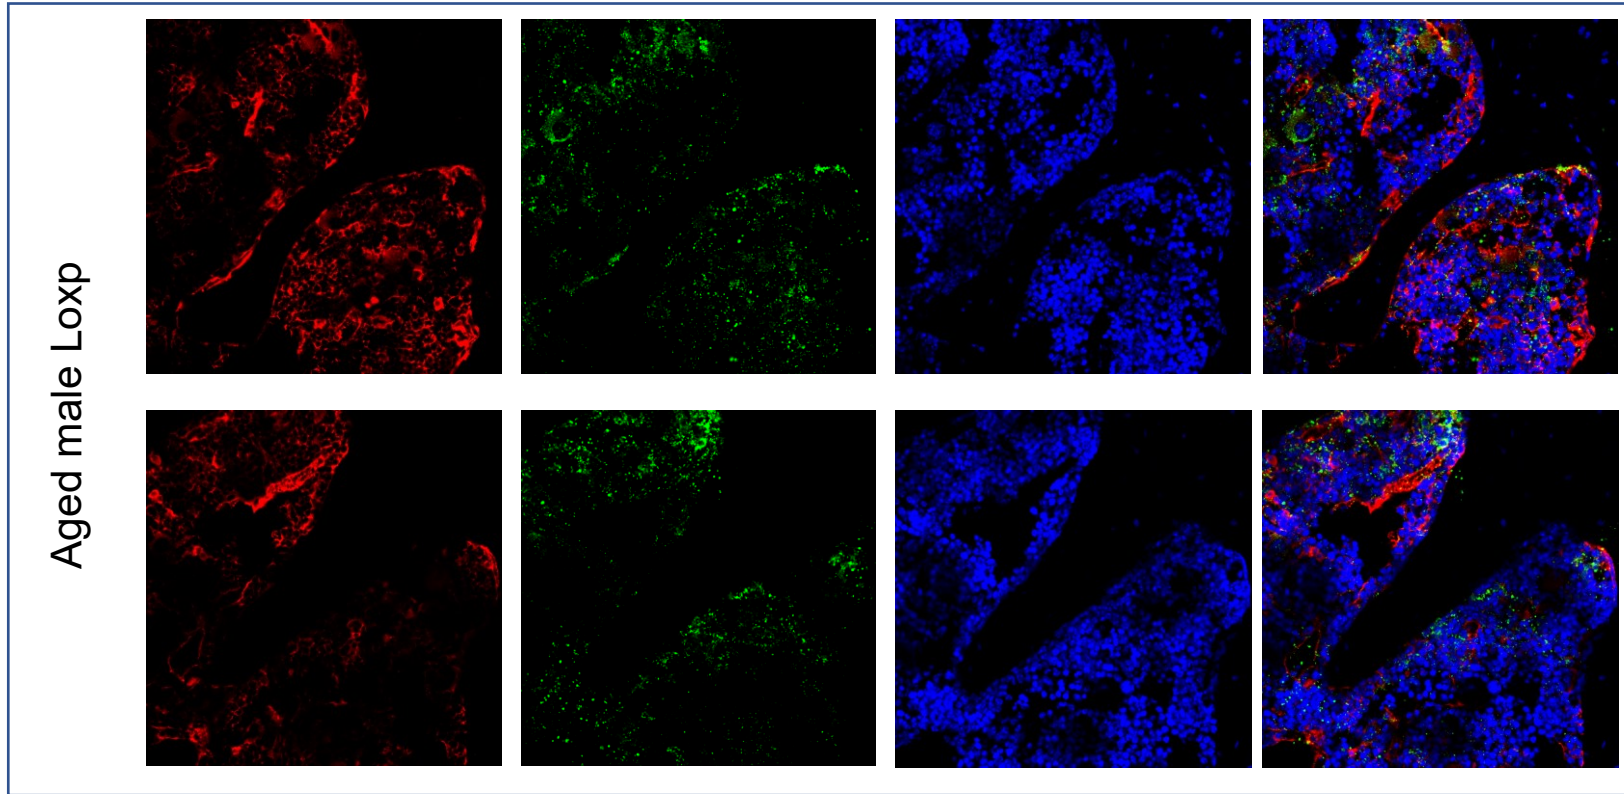



**Figure.3g** immunofluorescence images of murine femurs in aged mice

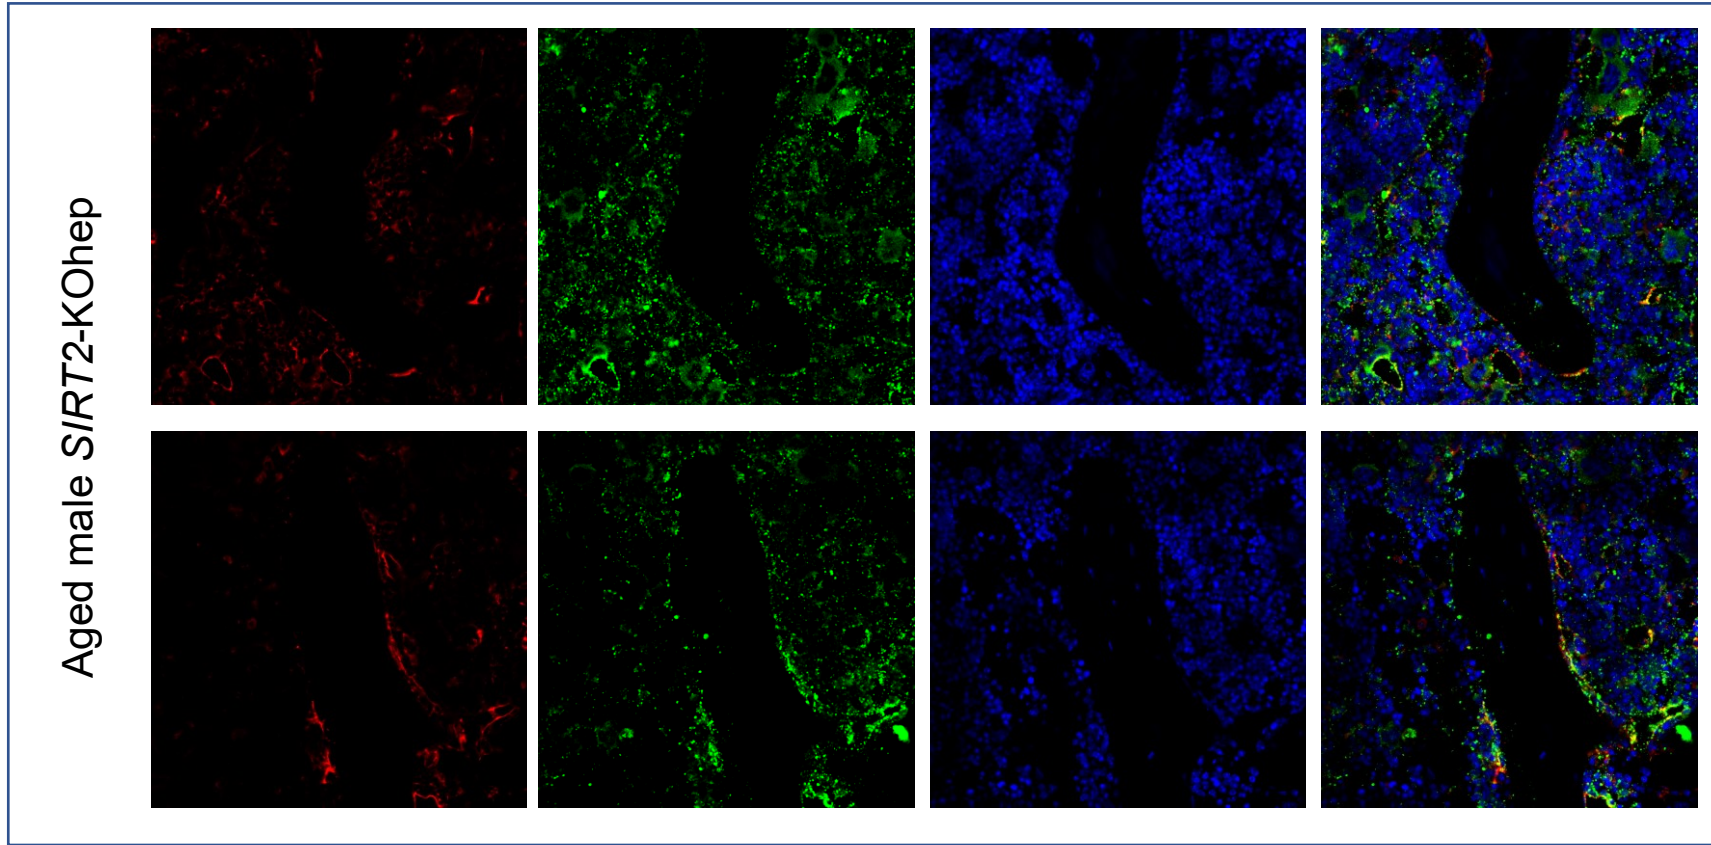

Figure.3m

sham Loxp-ctrl

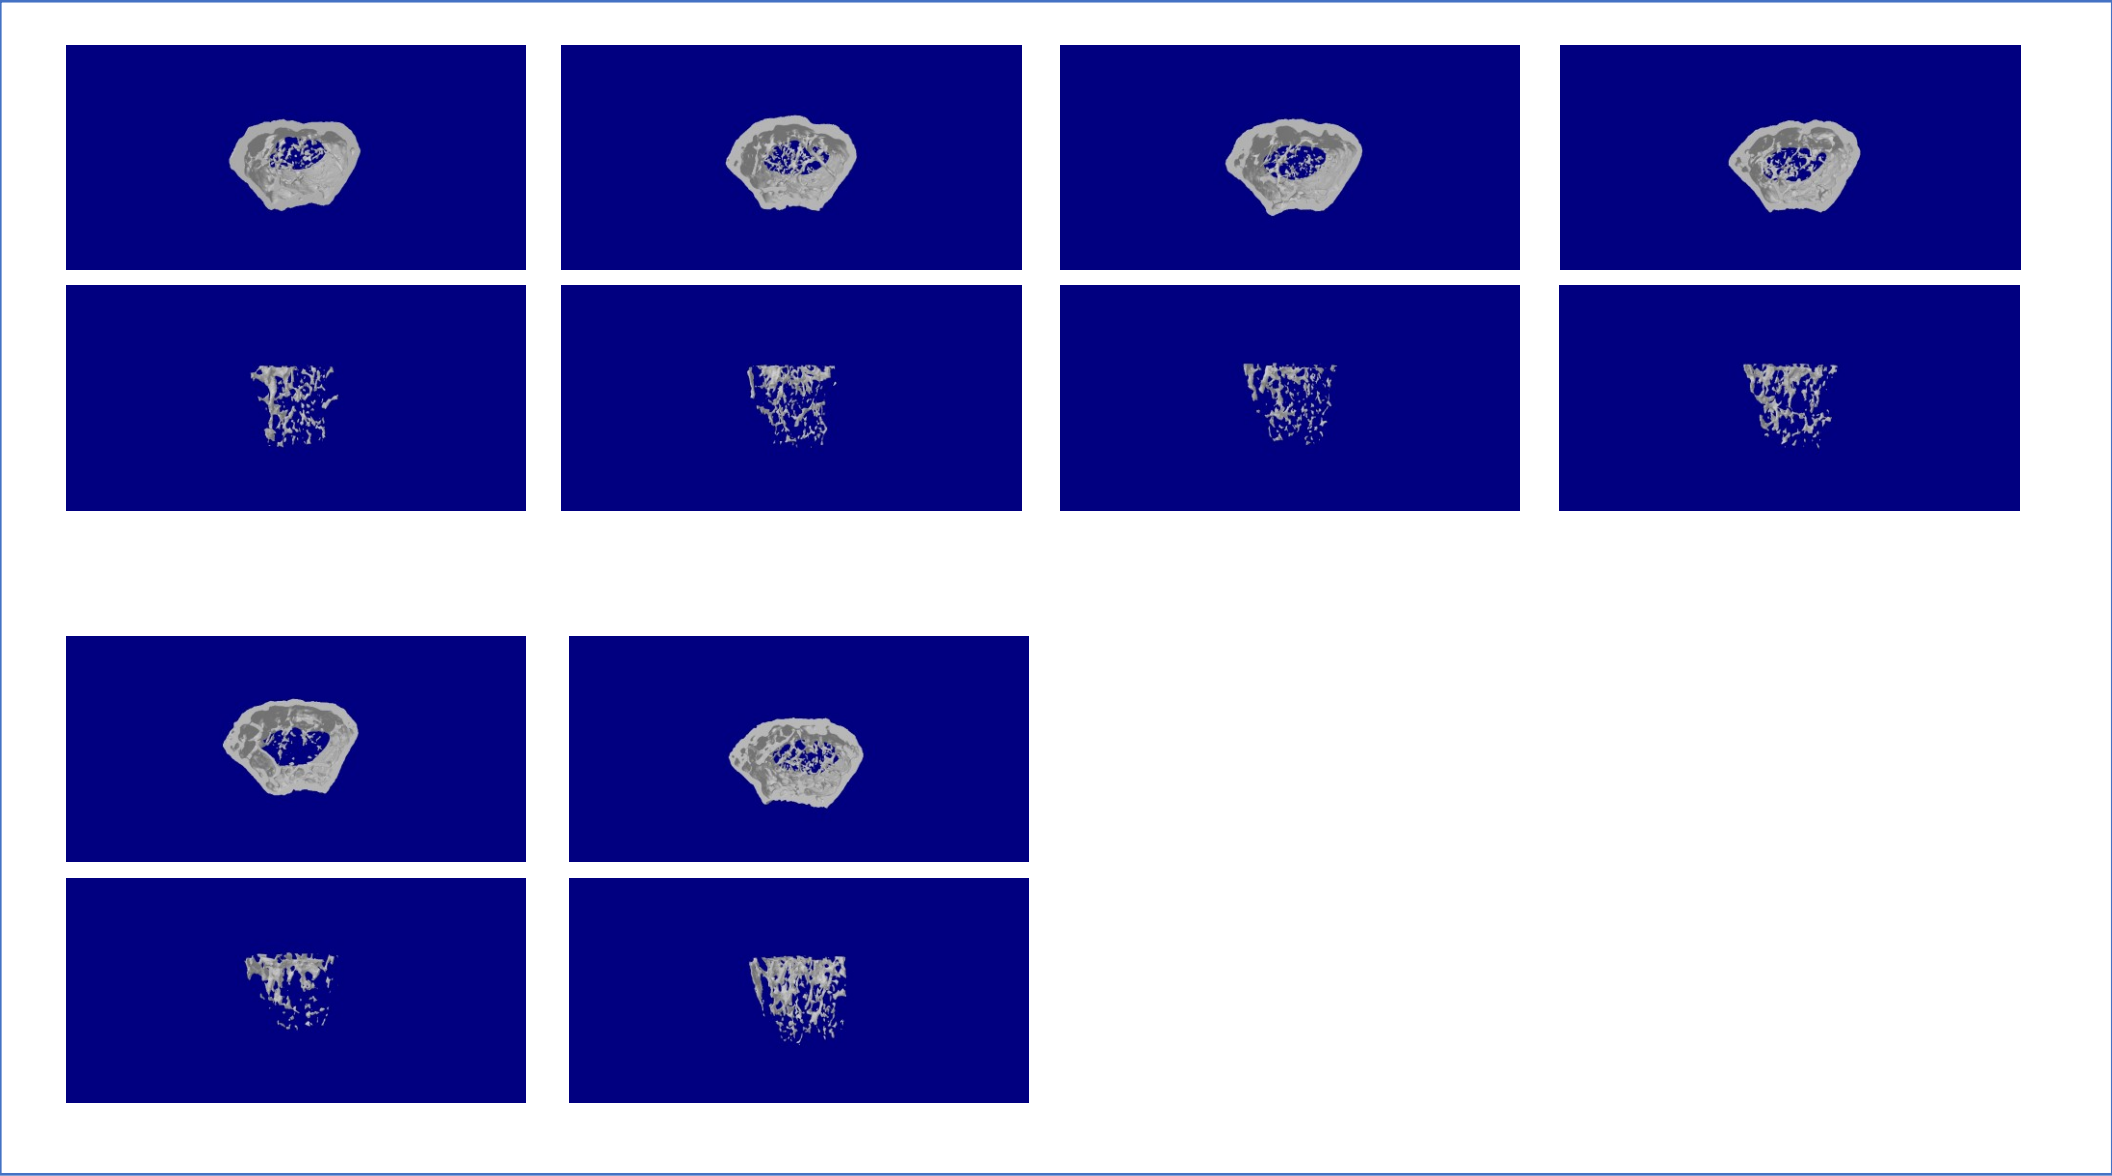

Figure.3m

sham SIRT2-KO<sup>hep-ctrl</sup>

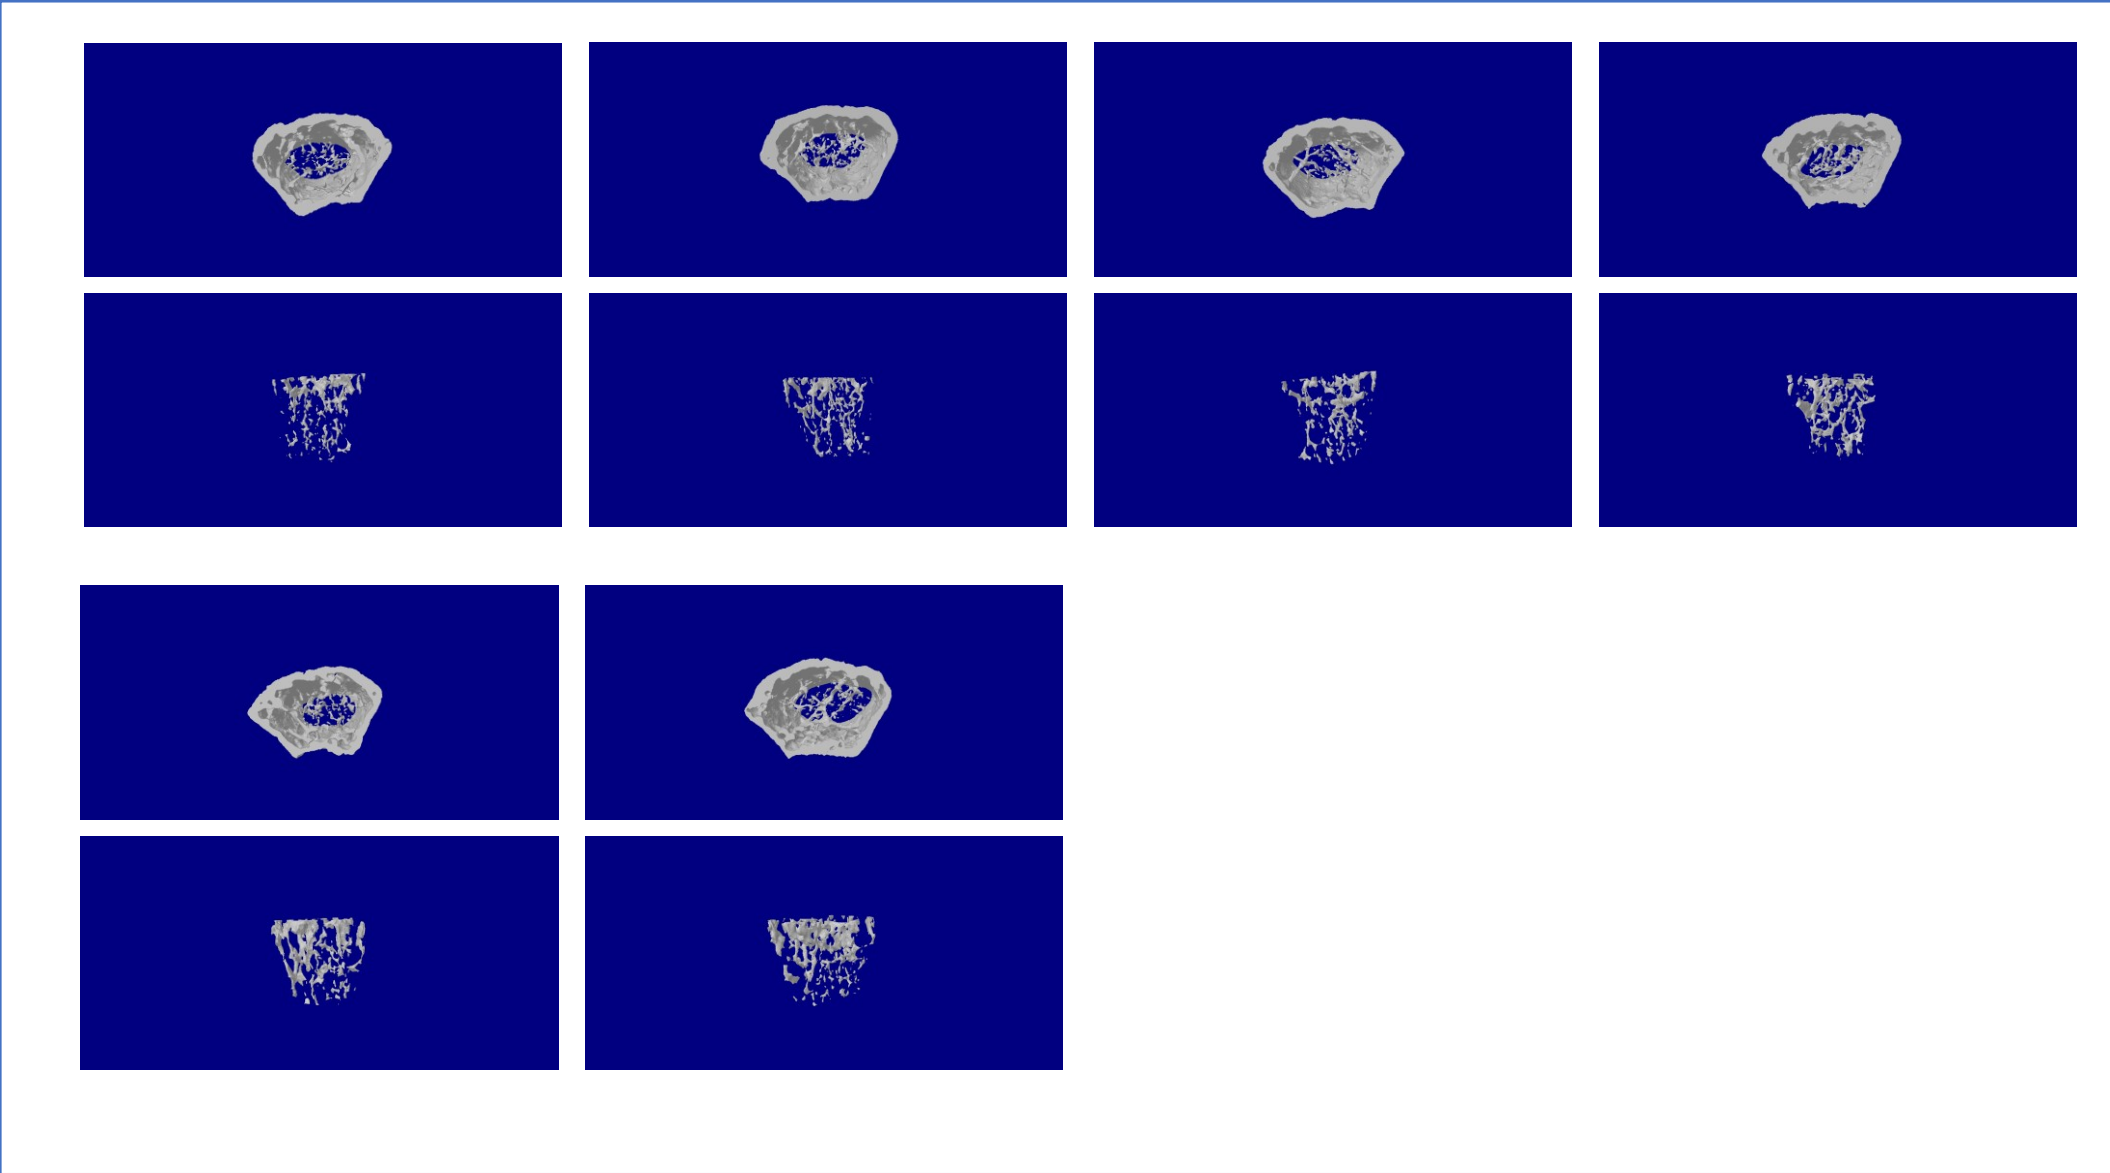

Figure.3m

OVX Loxp-ctrl

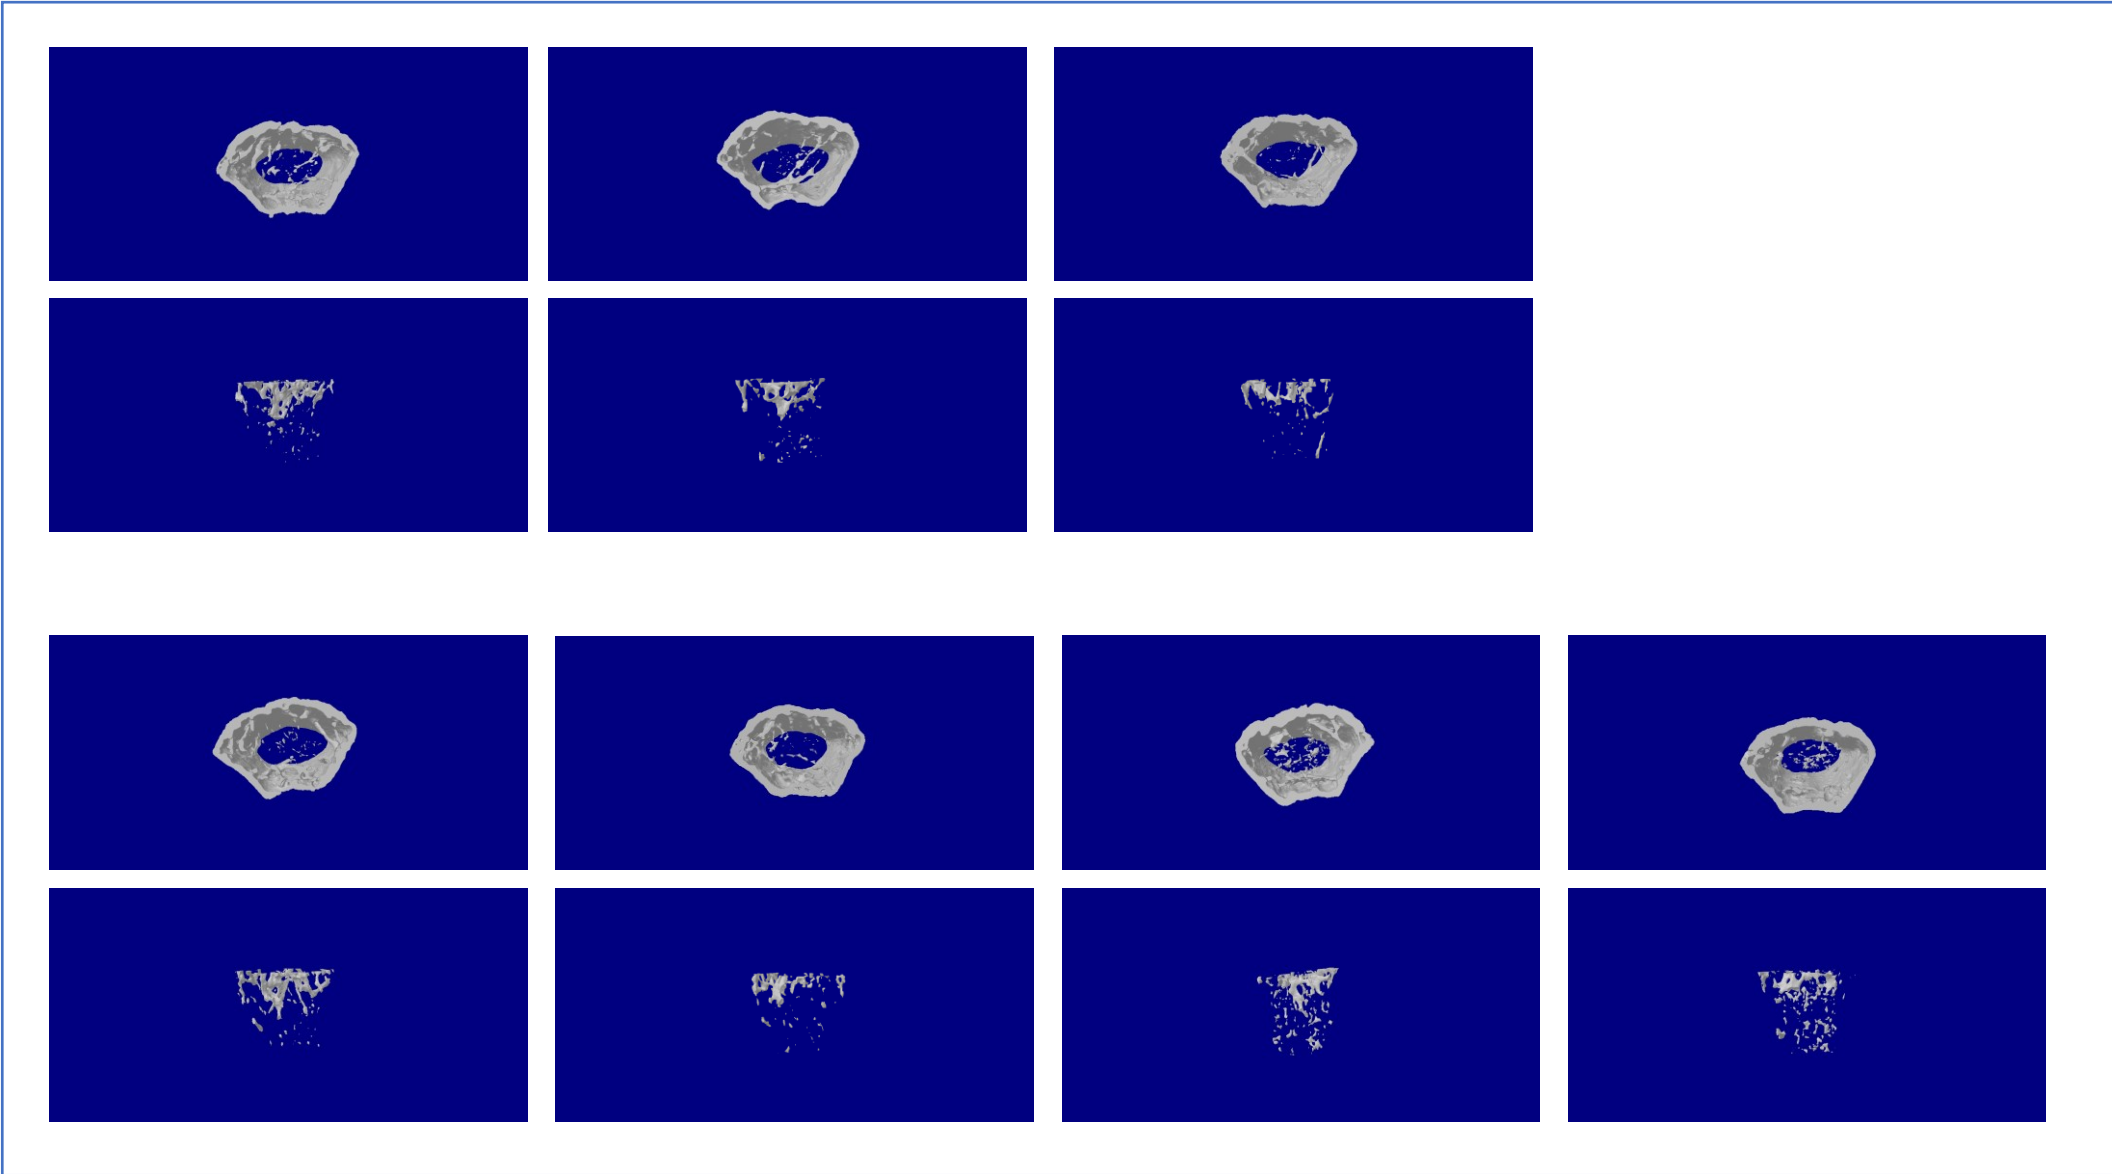

Figure.3m

OVX SIRT2-KO<sup>hep-ctrl</sup>

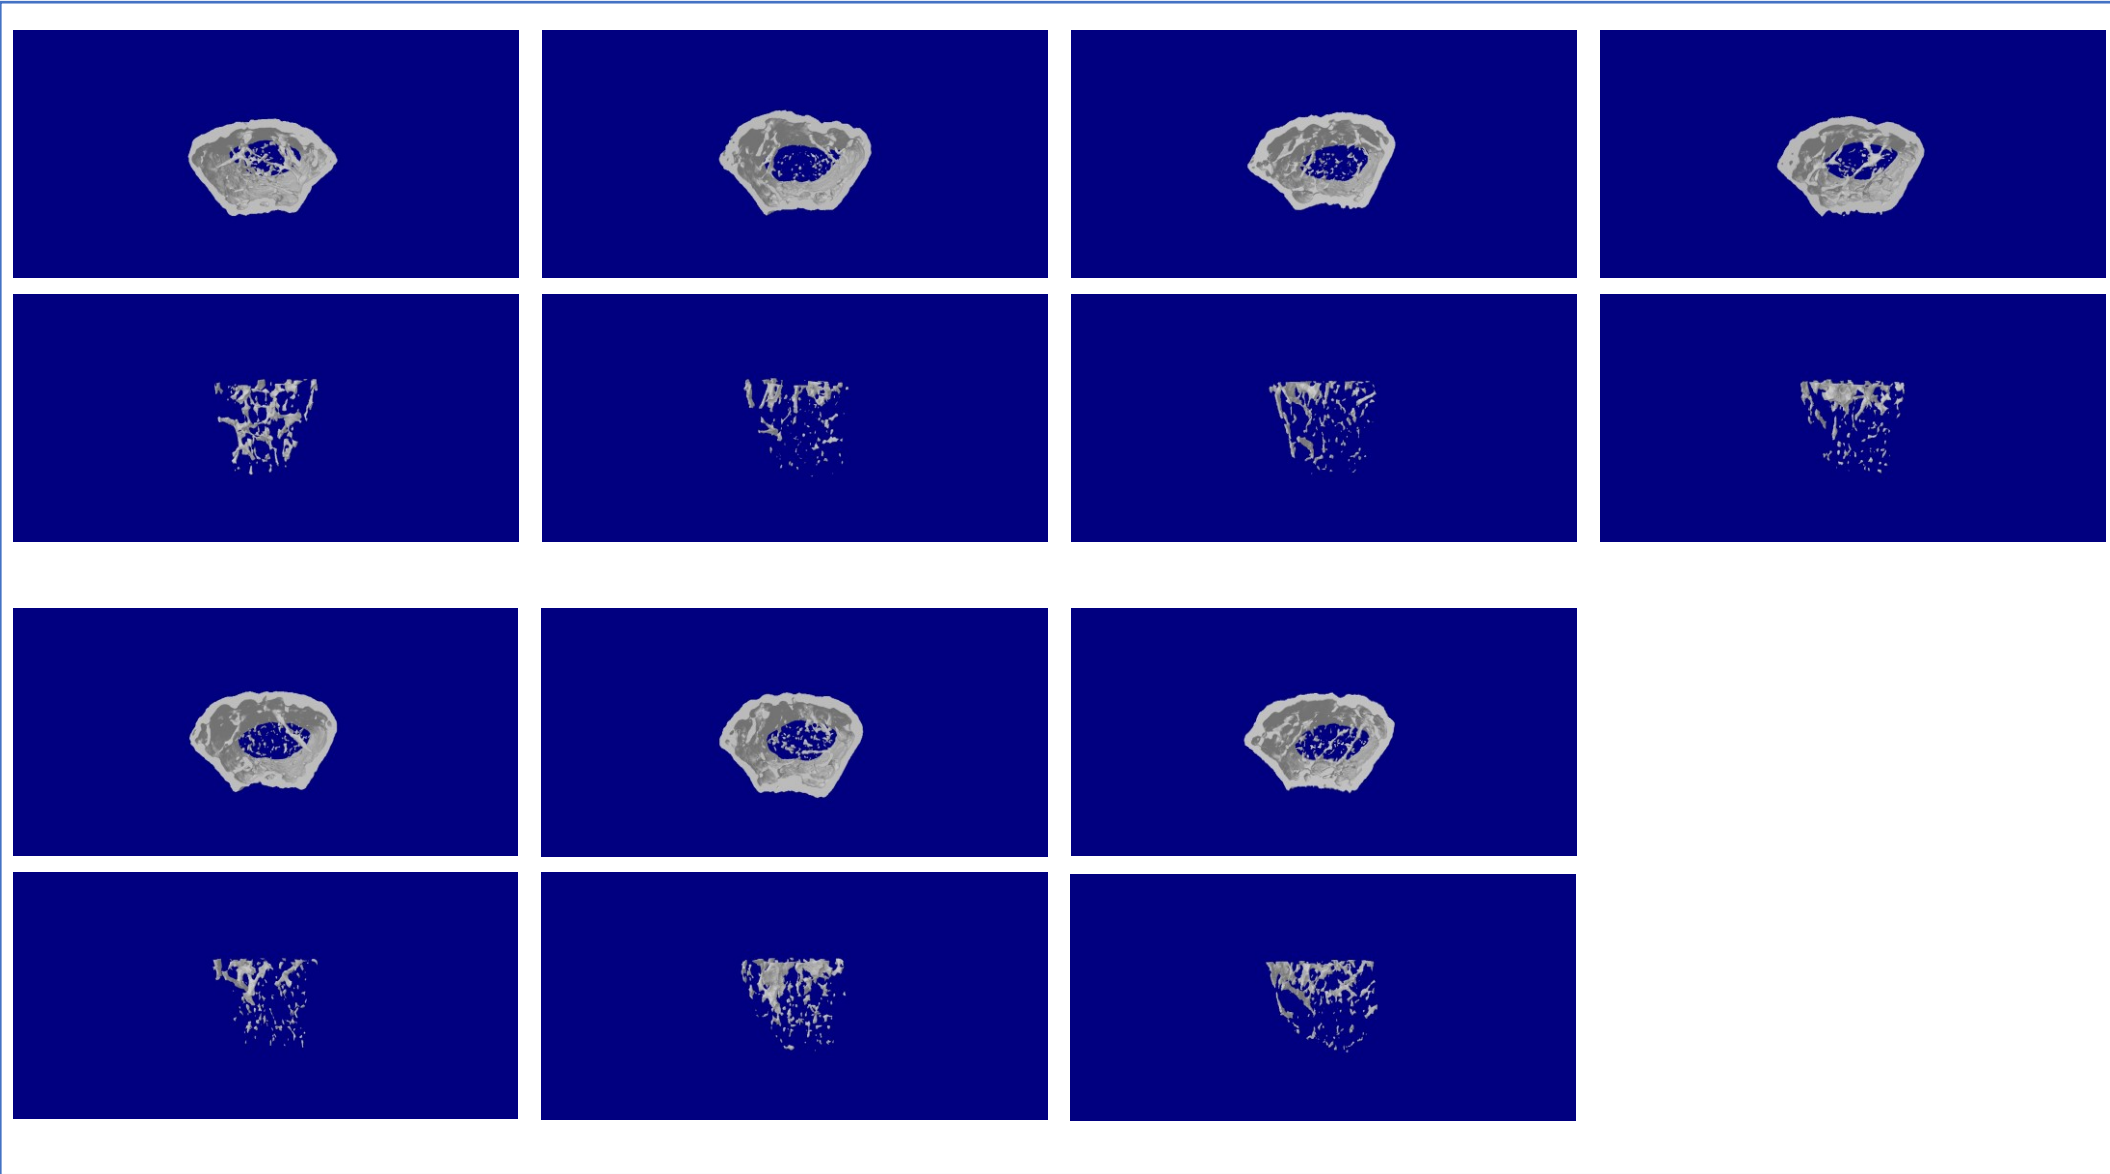

Figure.3m

OVX SIRT2-KO<sup>hep</sup>-shLRG1

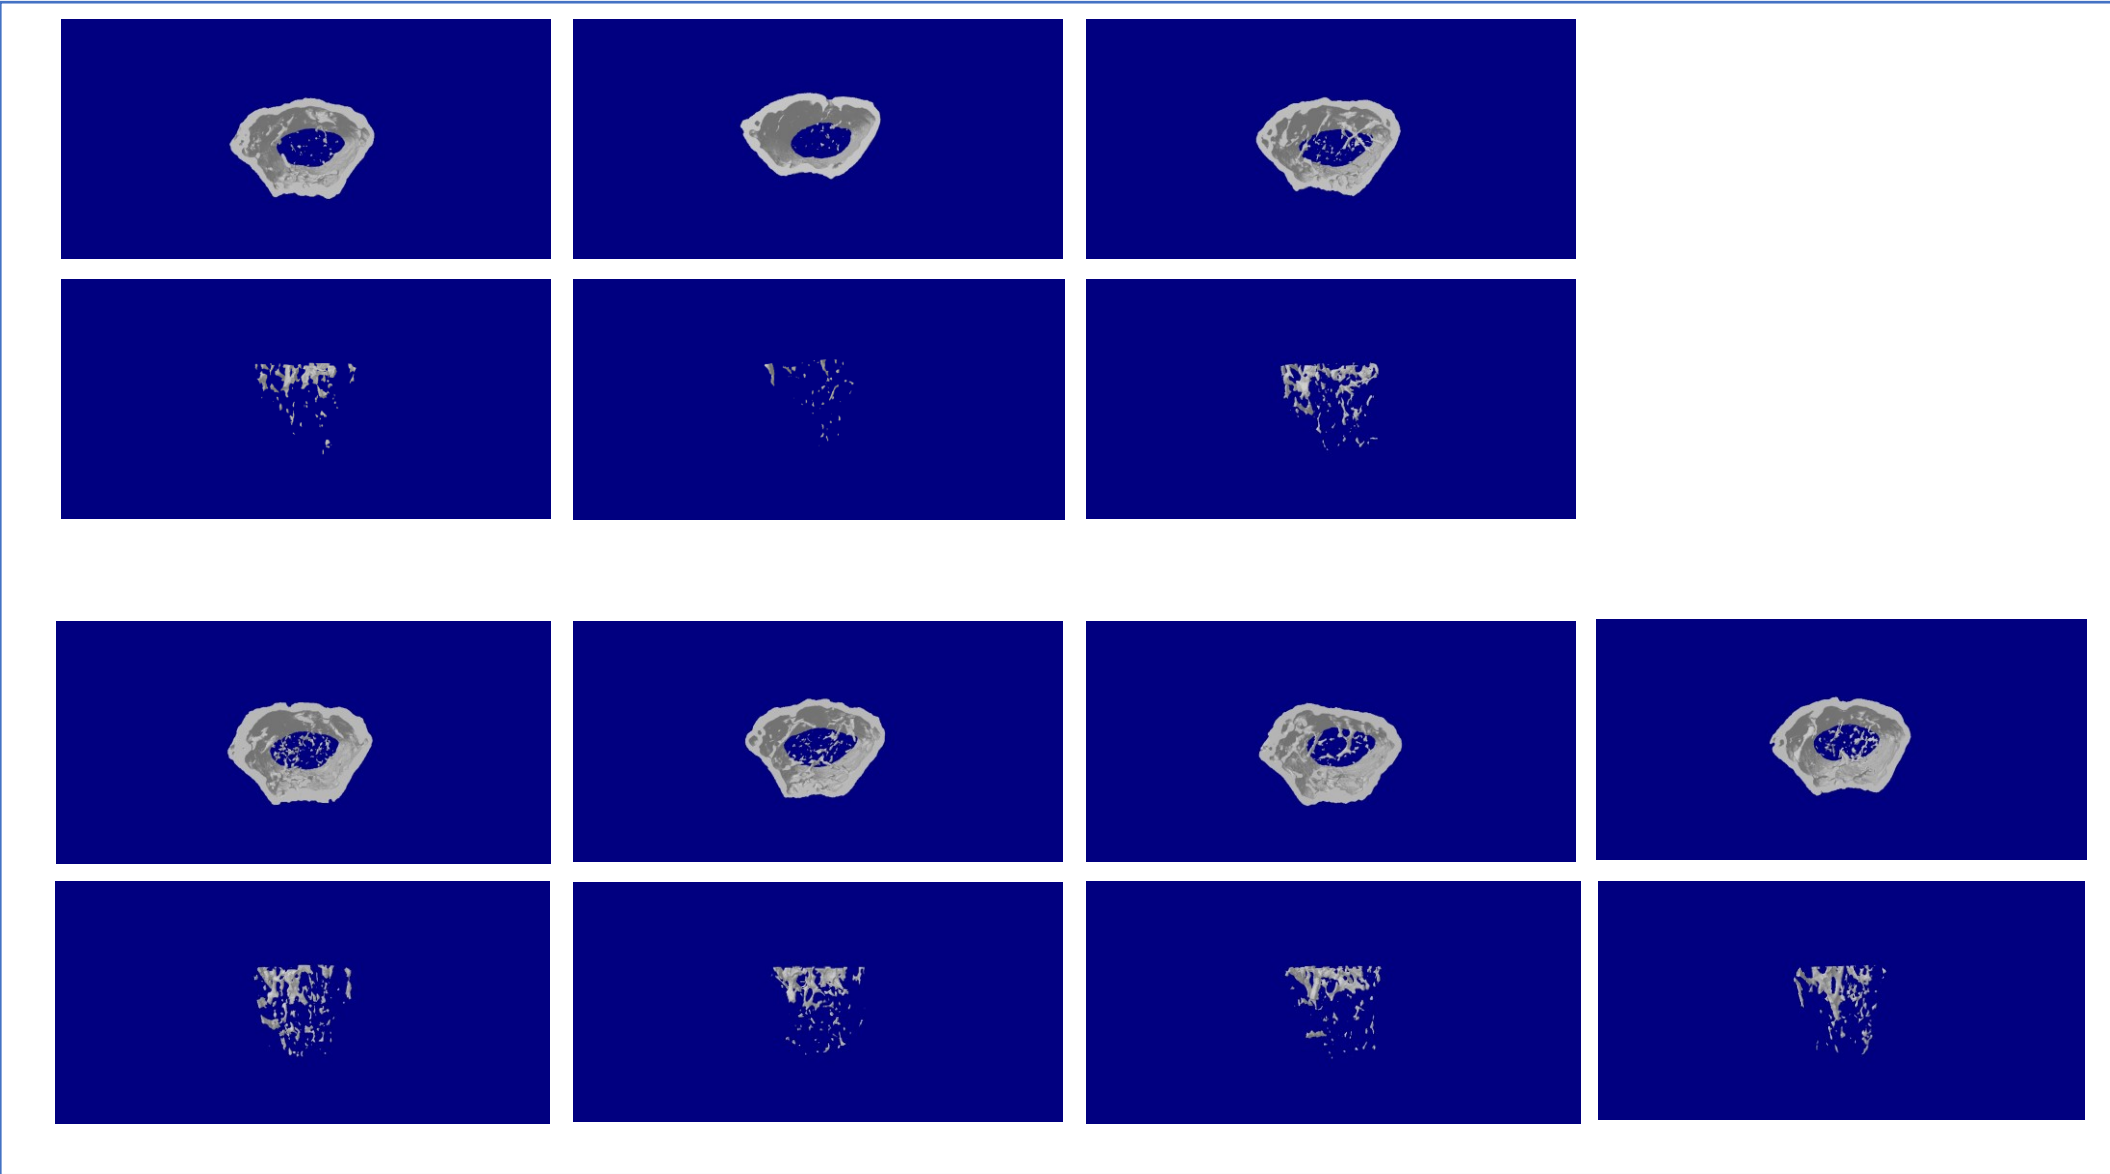

**Figure.4b**

TRAP staining of osteoclasts treated with sEVs from AML-12 cells

NC-sEVs

shSIRT2-sEVs

shSIRT2/LRG1-sEVs

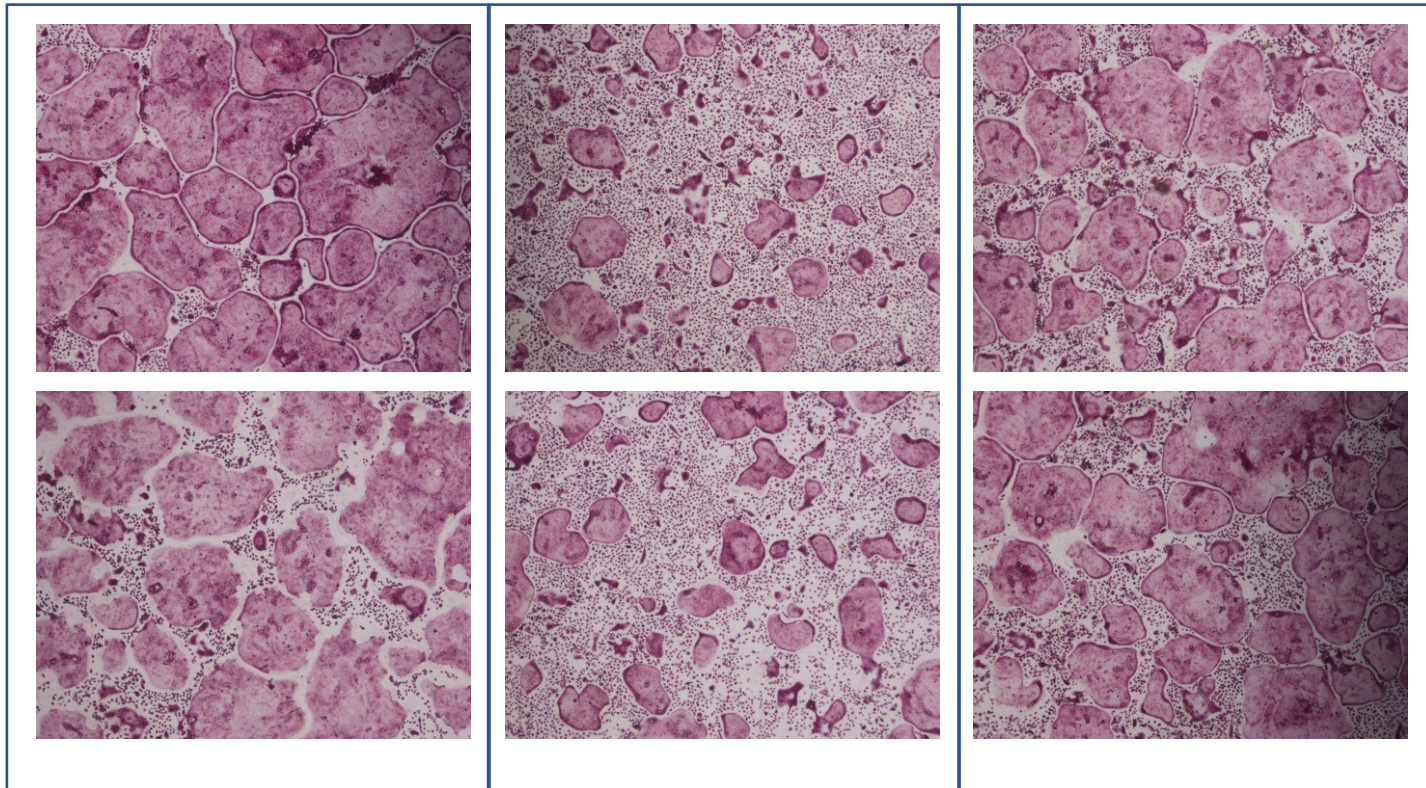

Figure.4h

sham NC-sEVs

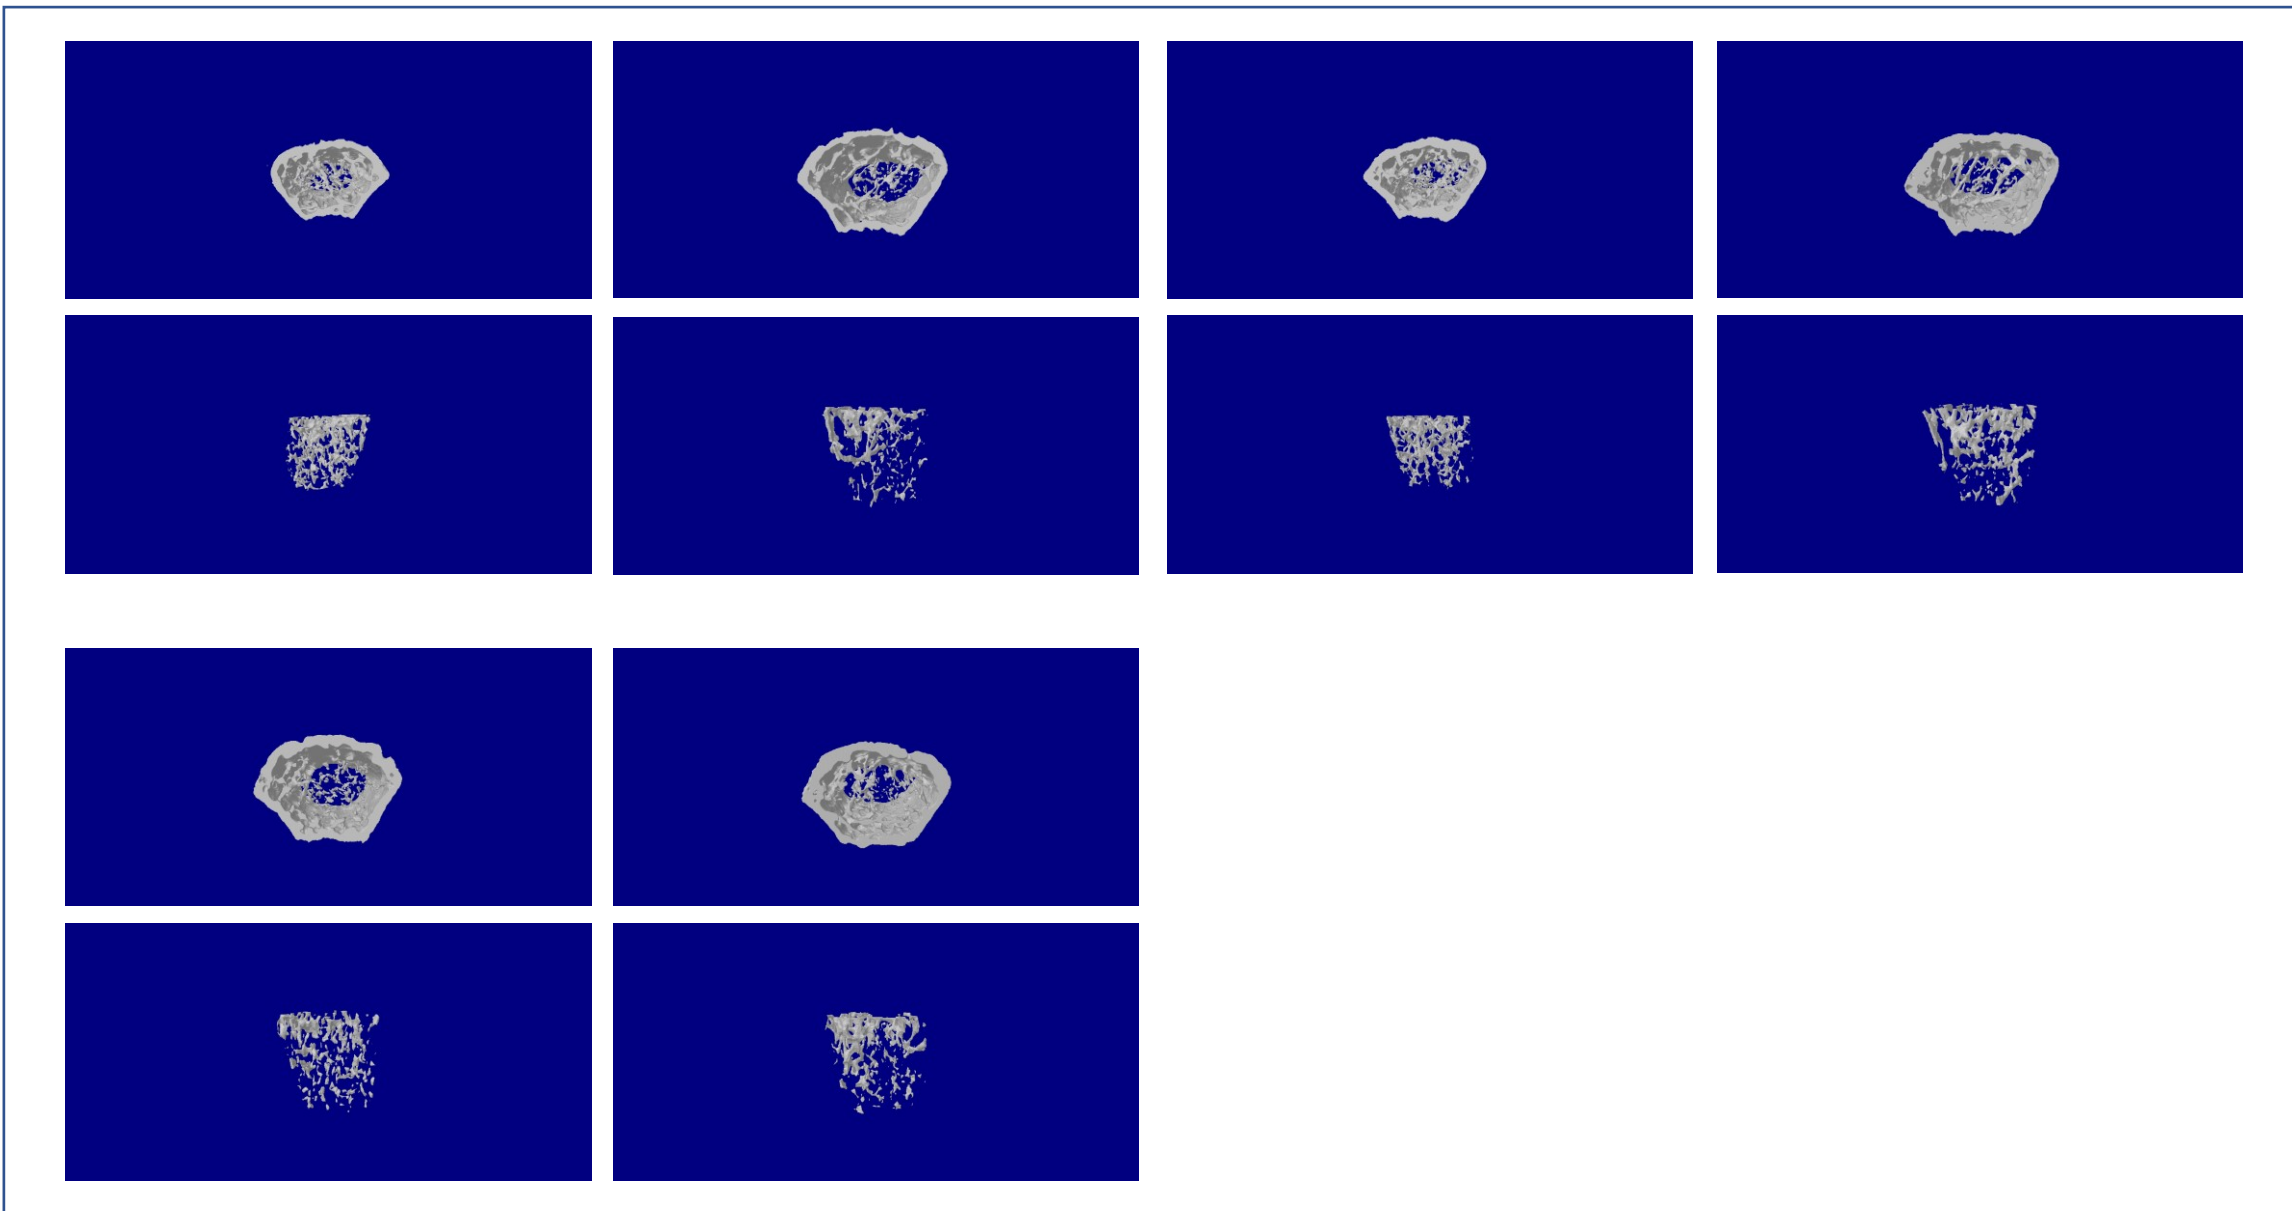



Figure.4h

OVX NC-sEVs

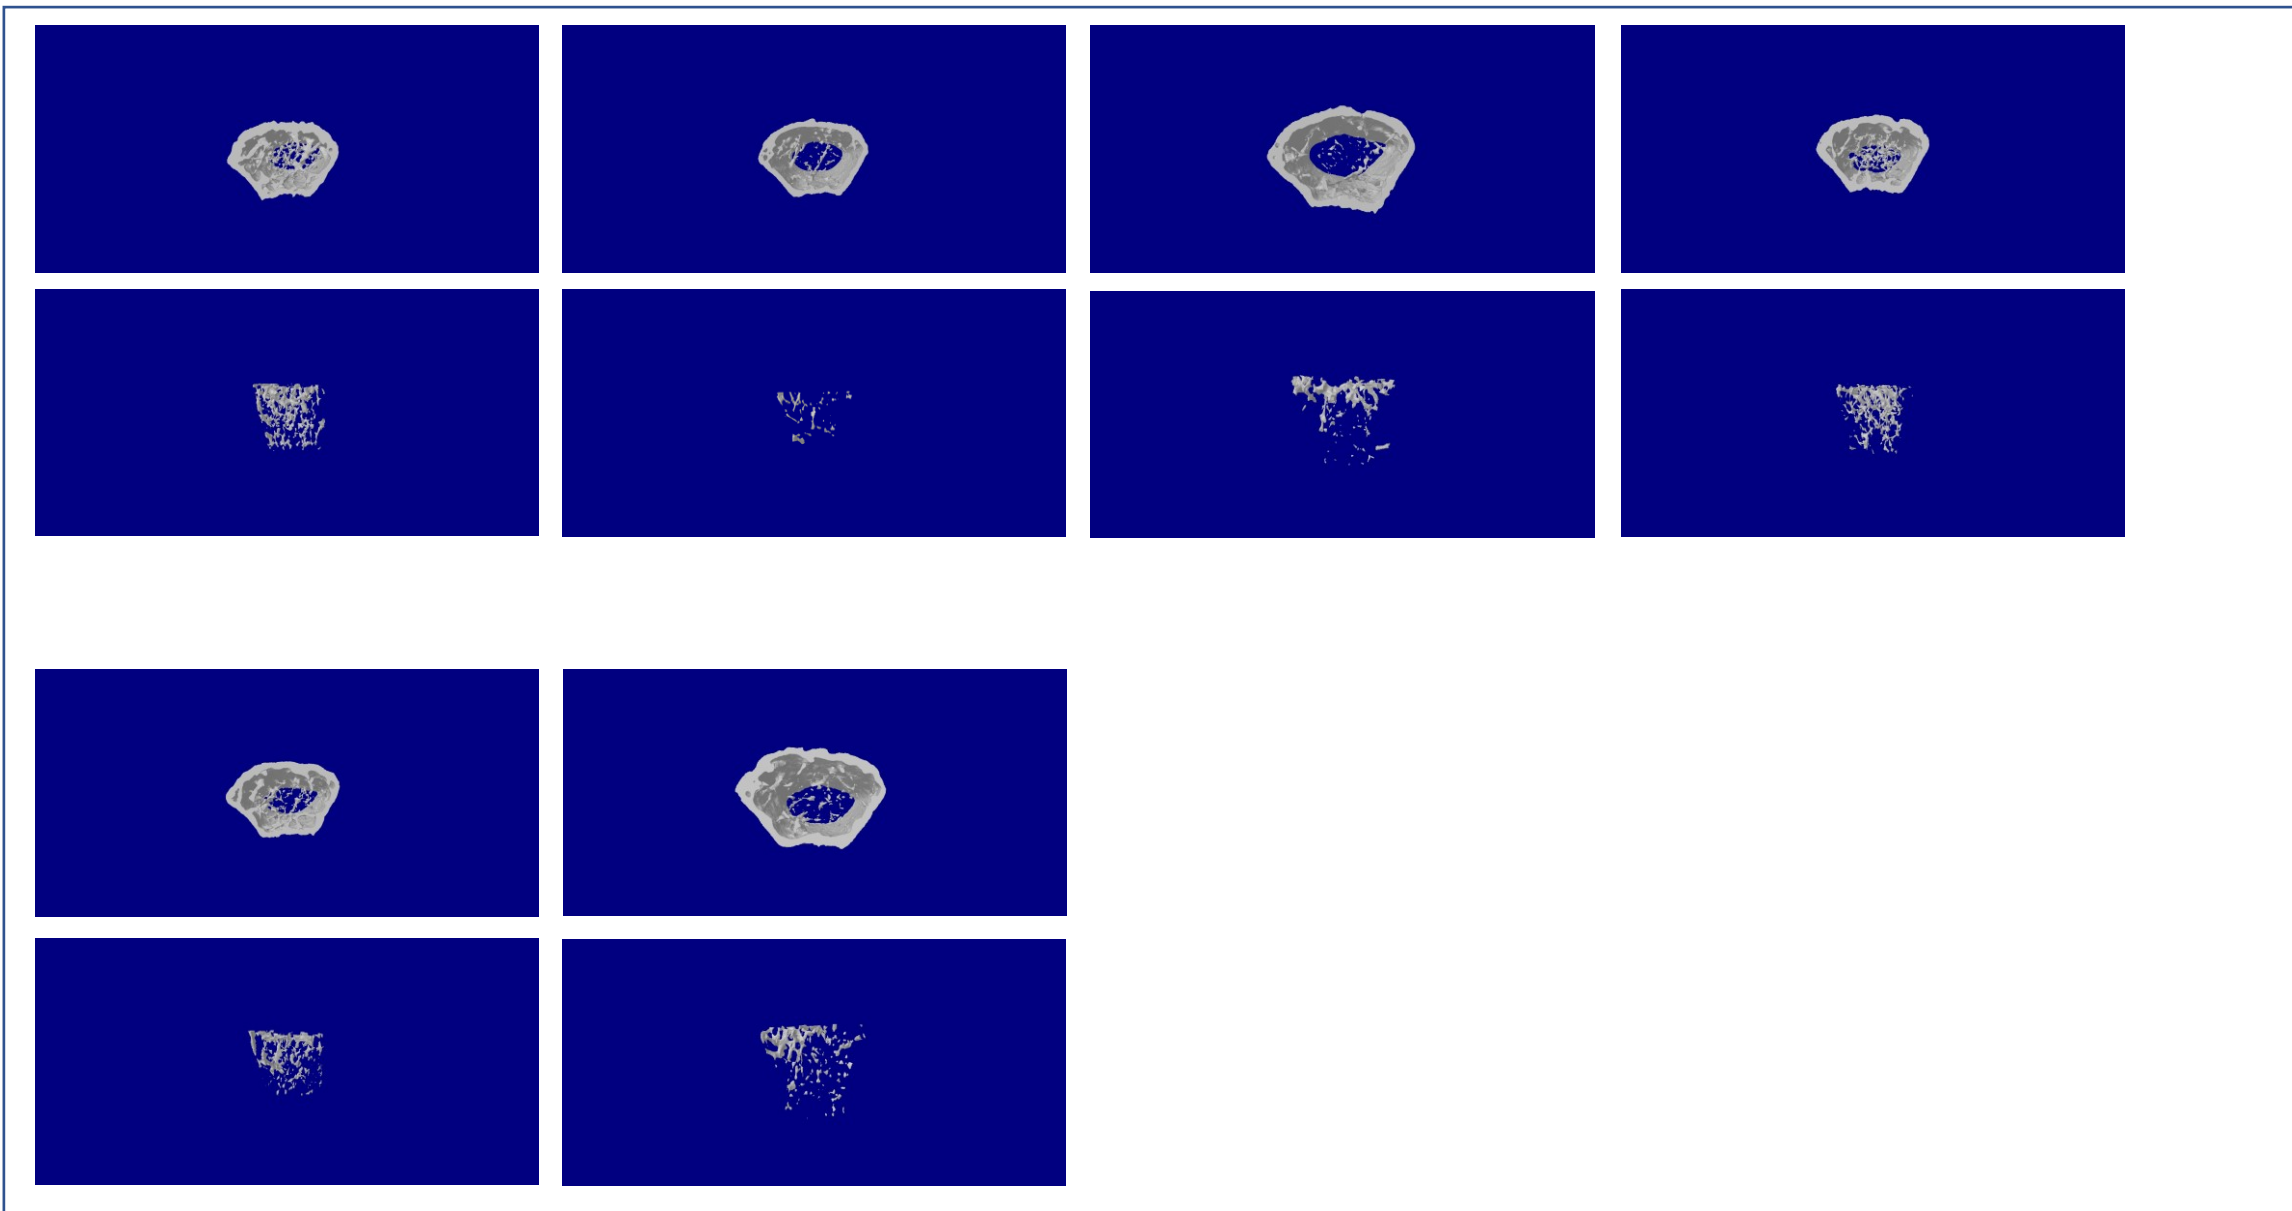

Figure.4h

OVX shSIRT2-sEVs

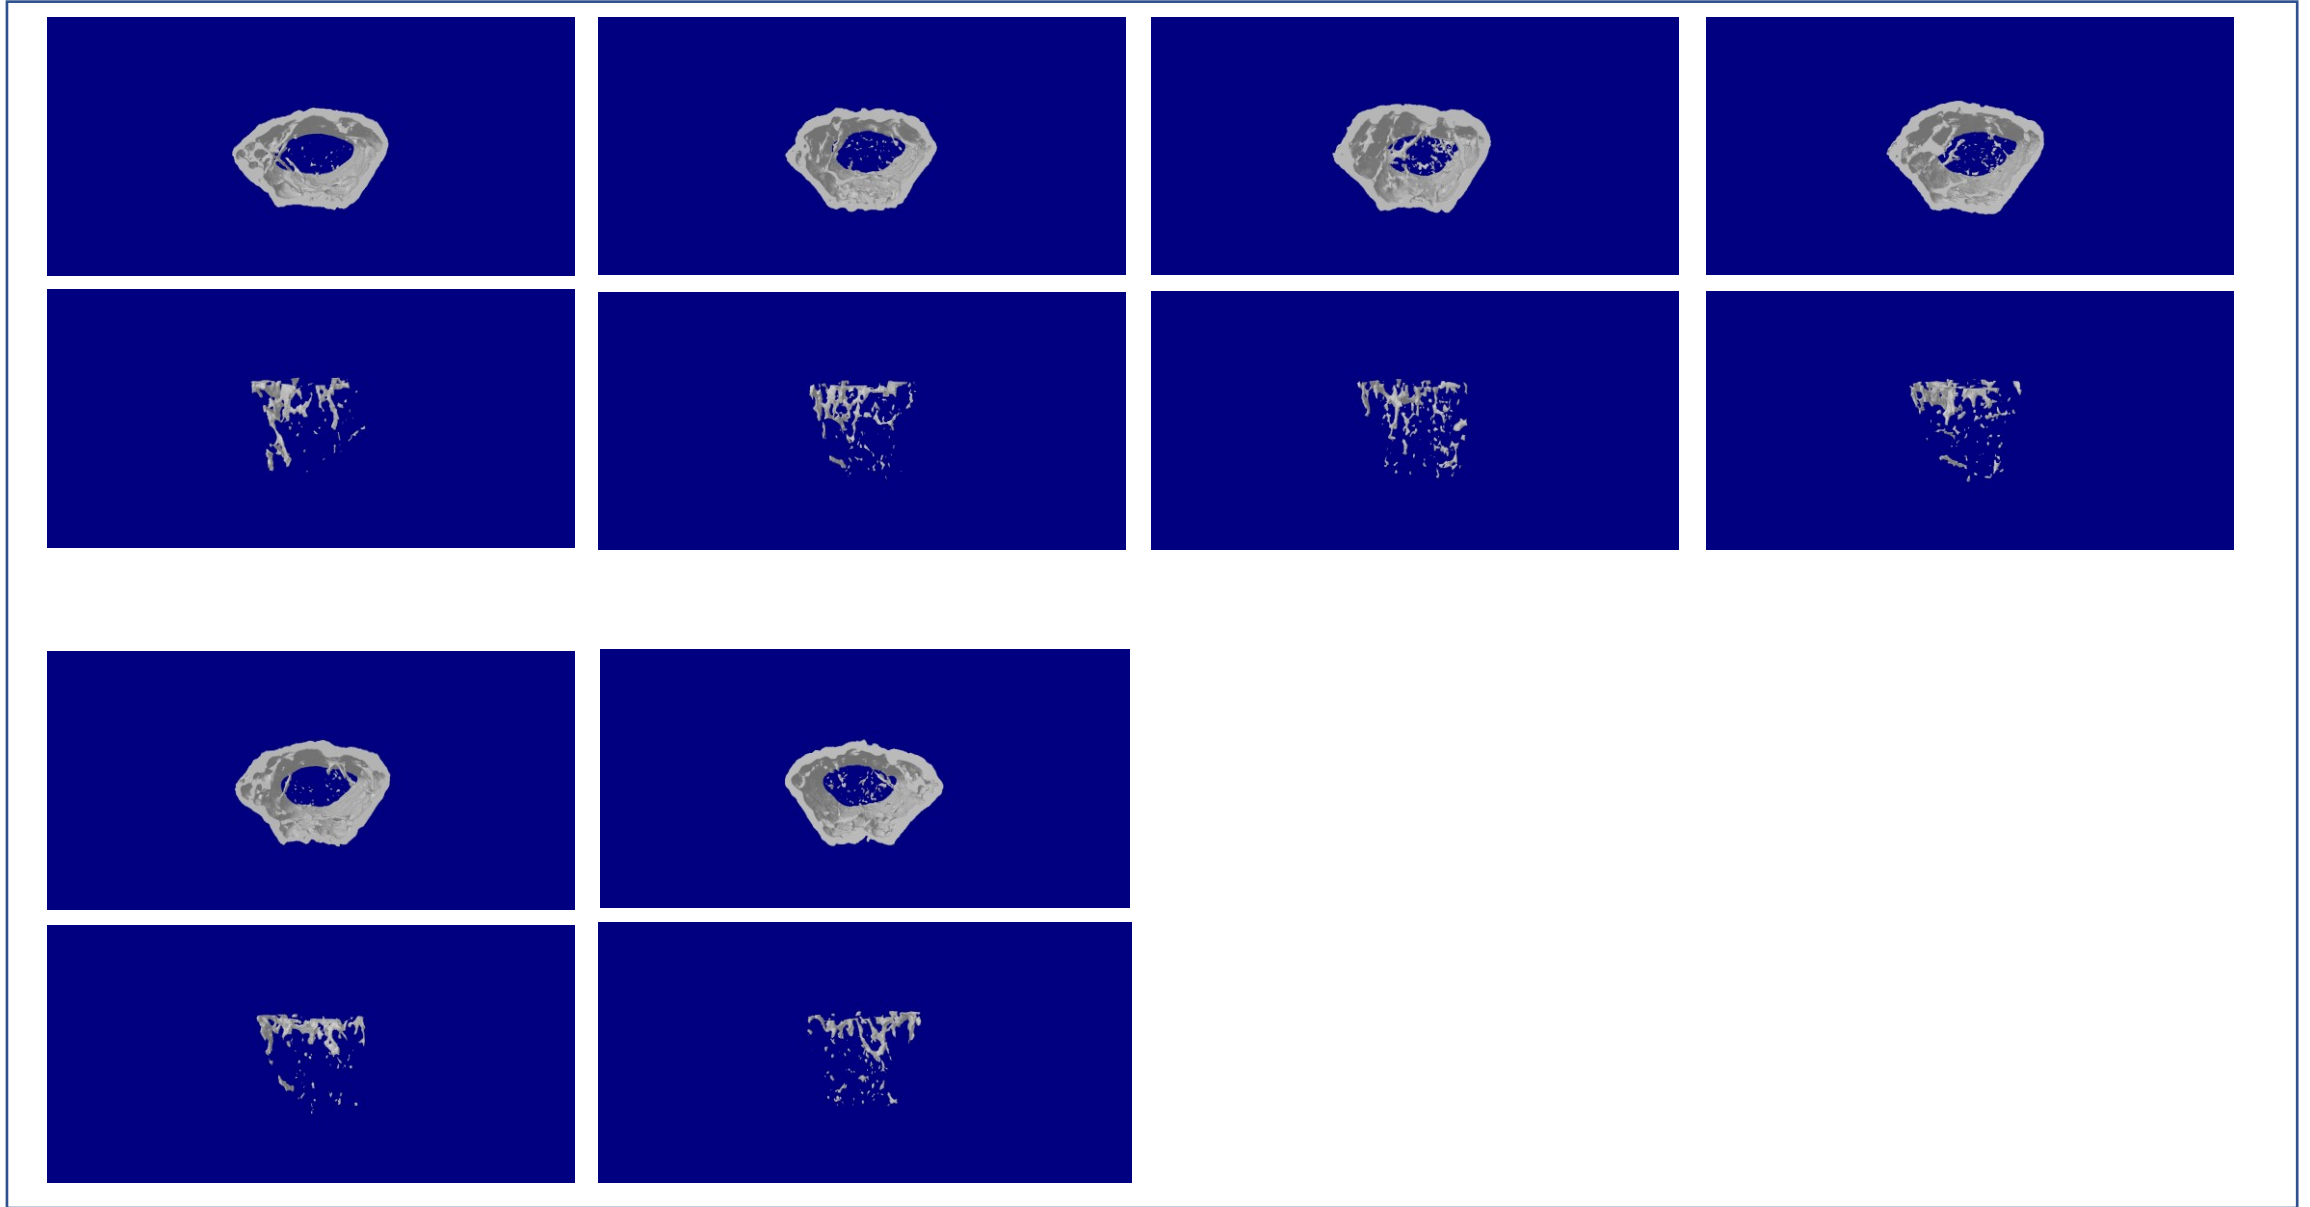

Figure.4h

OVX shSIRT2-shLRG1-sEVs

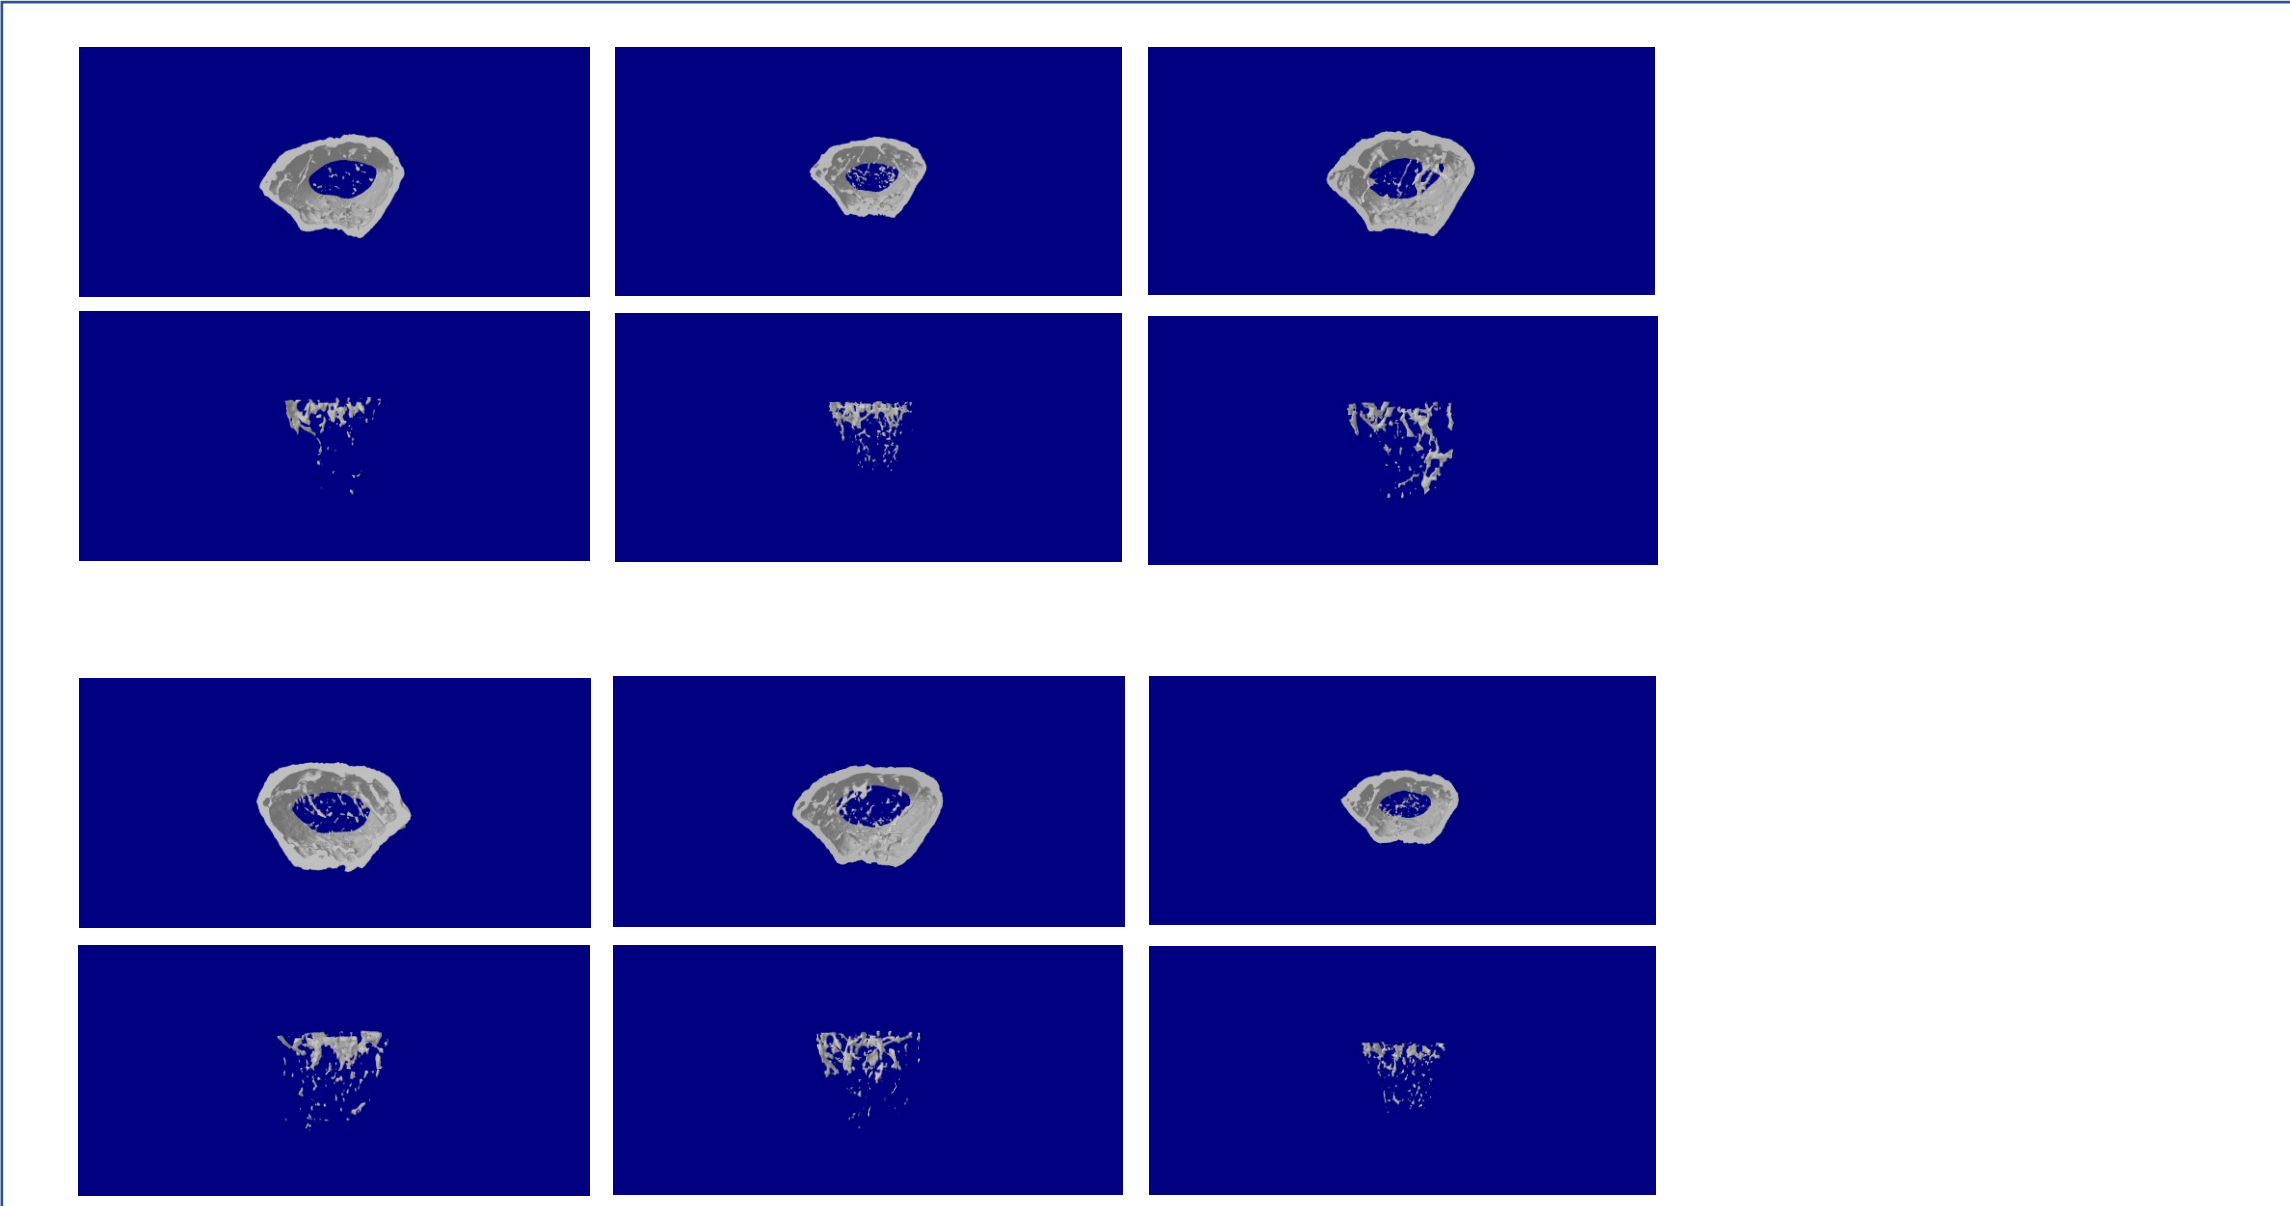

Figure.4h

OVX LRG1-sEVs

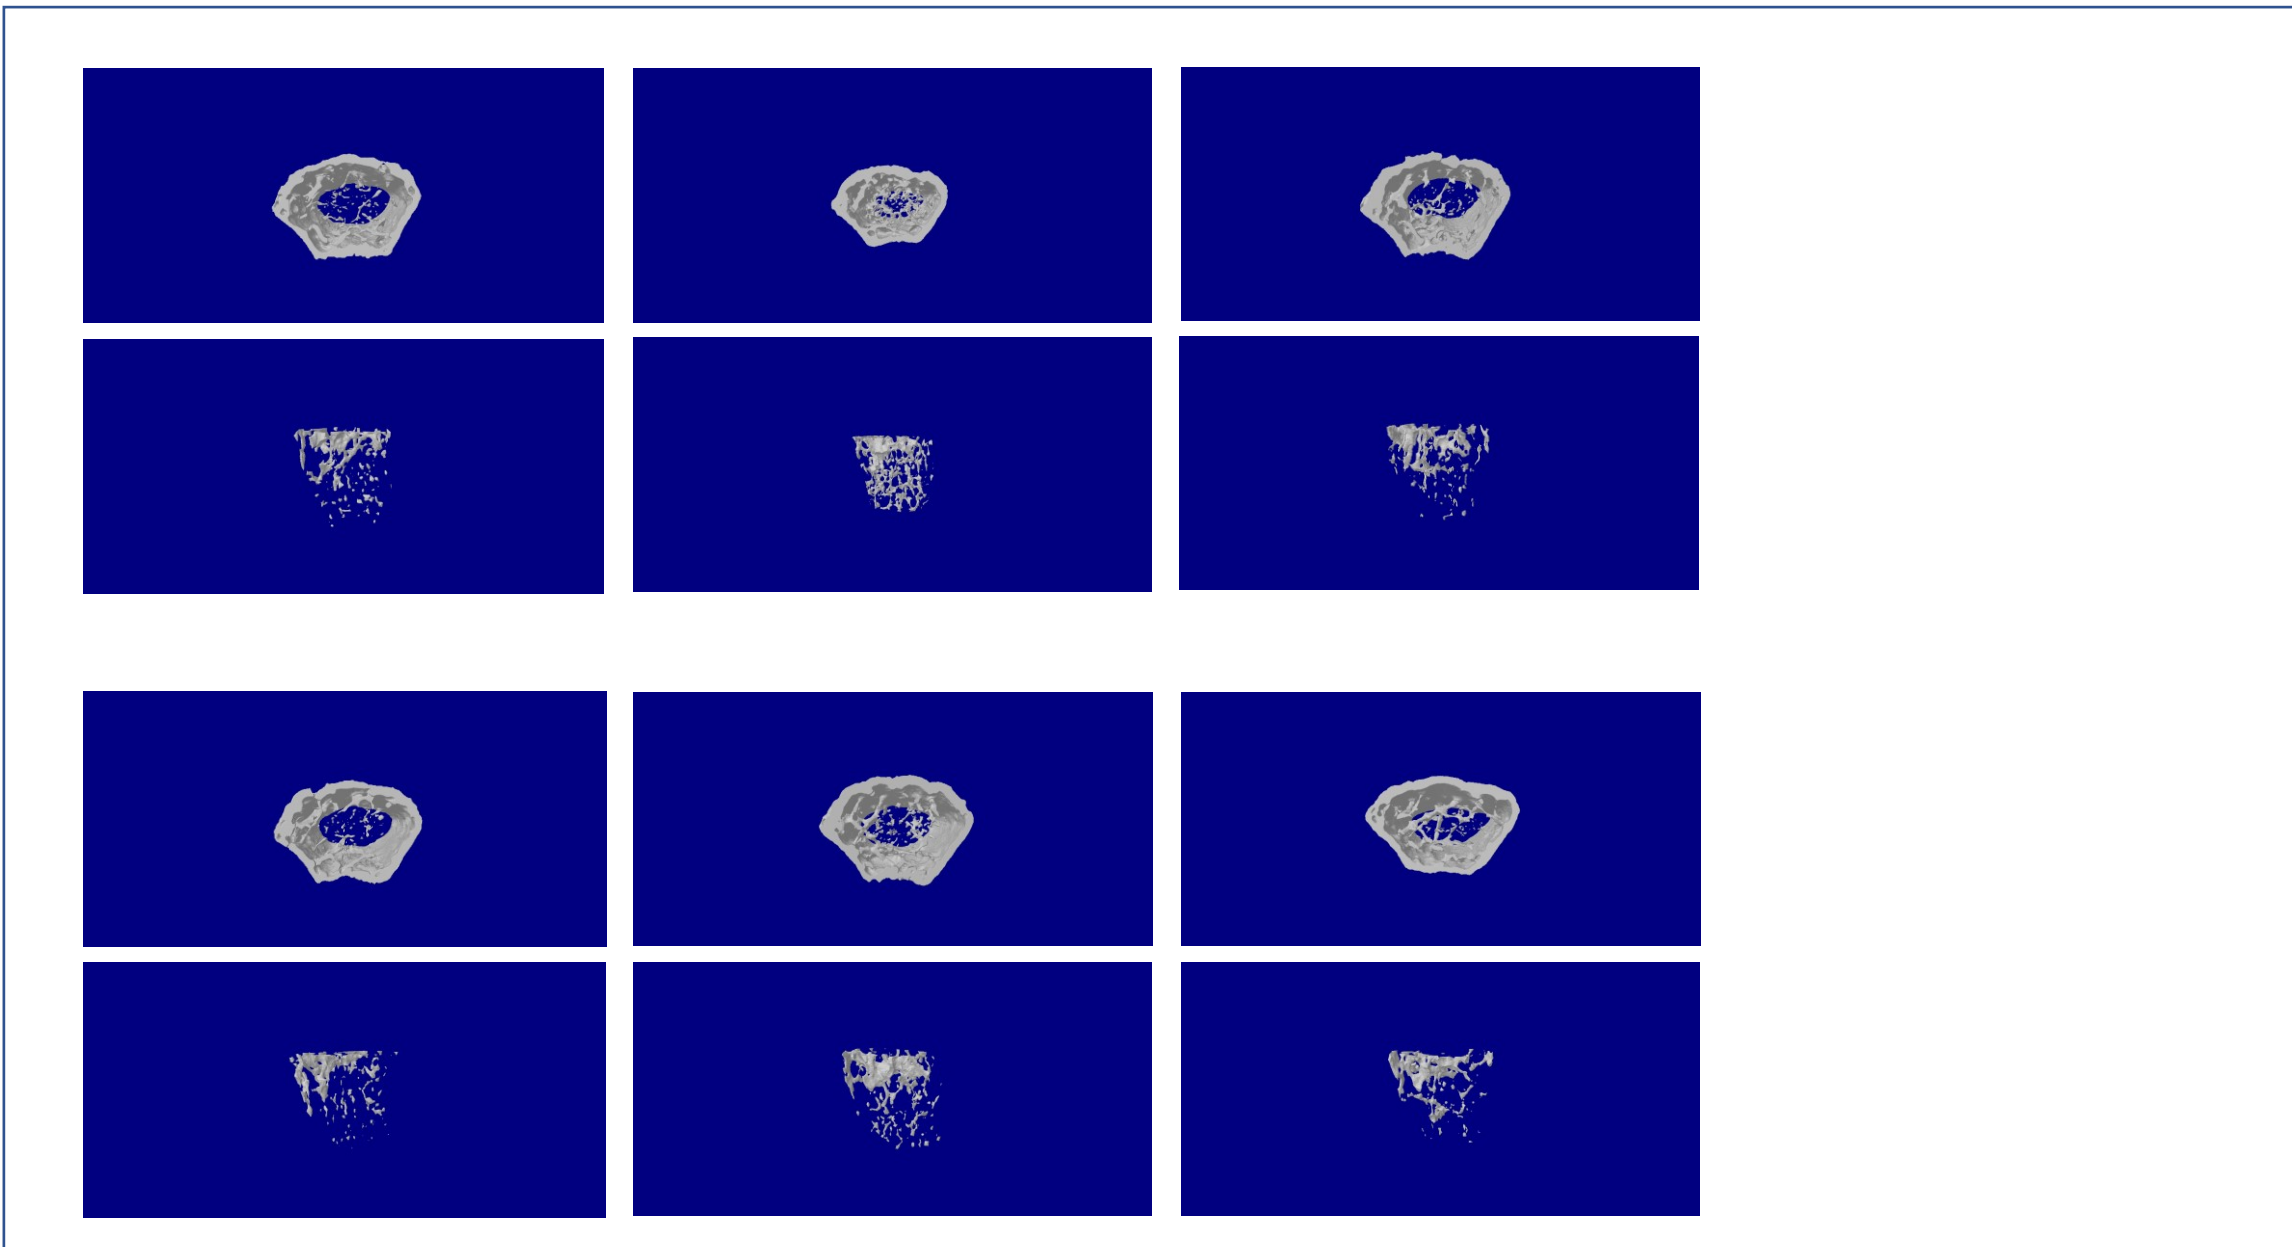

**Figure.4k** TRAP staining on paraffin-embedded femur sections in each group after corresponding sEVs treatment

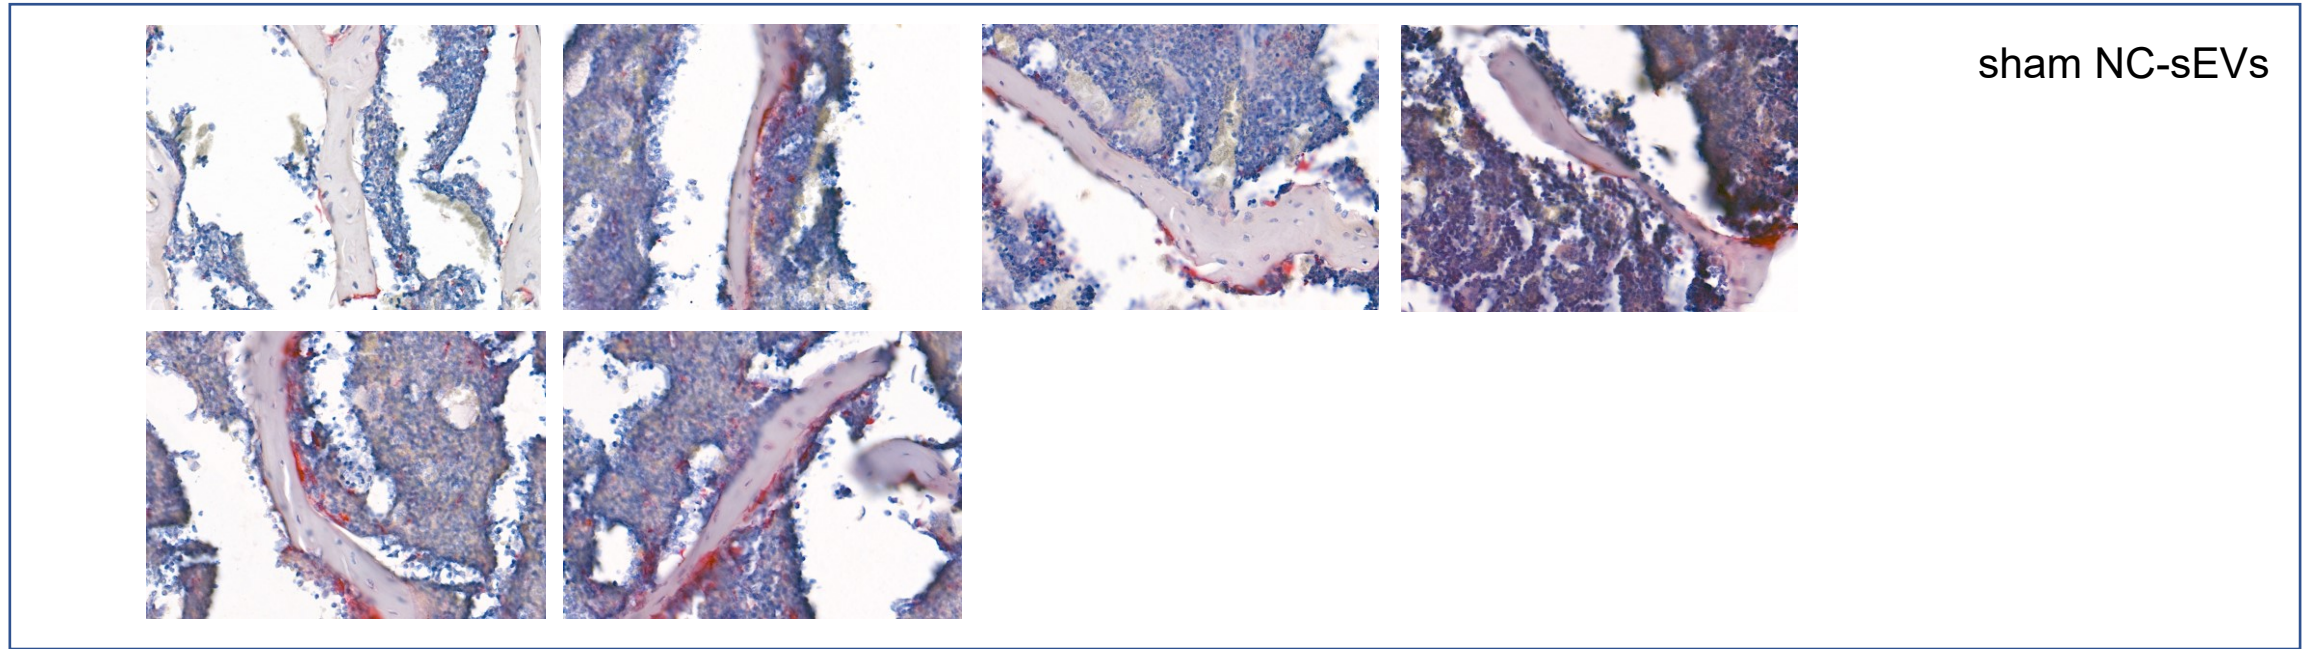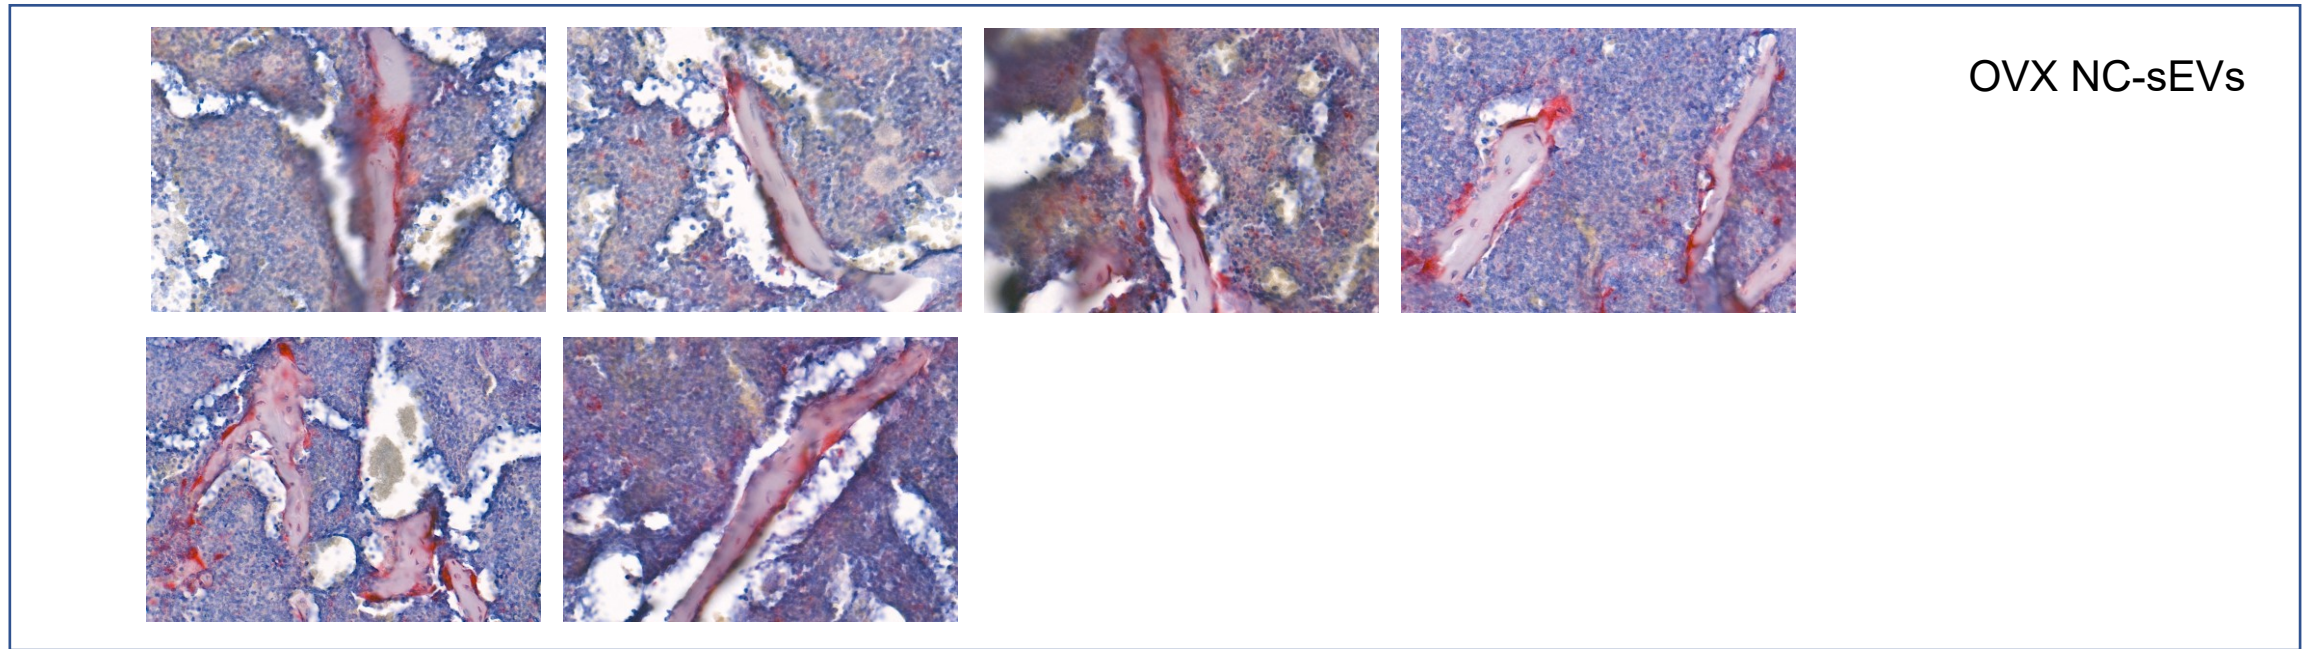

**Figure.4k** TRAP staining on paraffin-embedded femur sections in each group after corresponding sEVs treatment

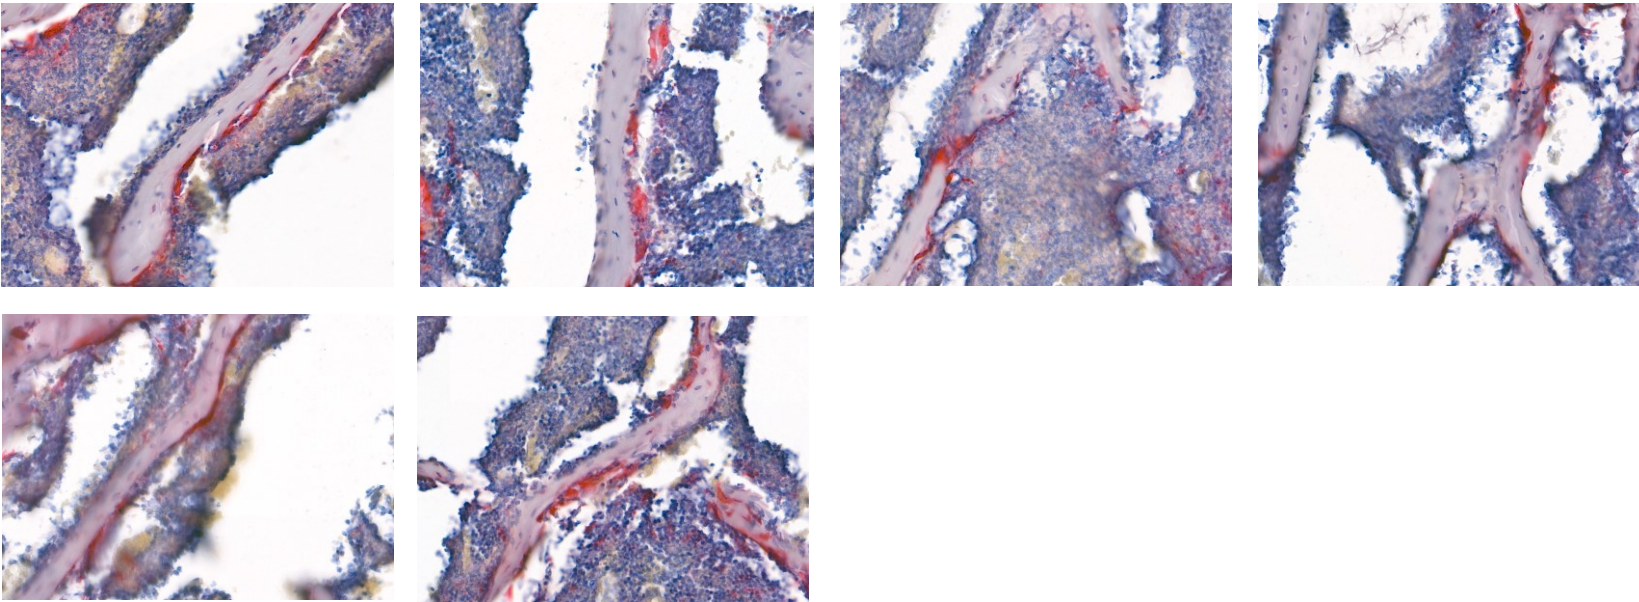

OVX shSIRT2-sEVs

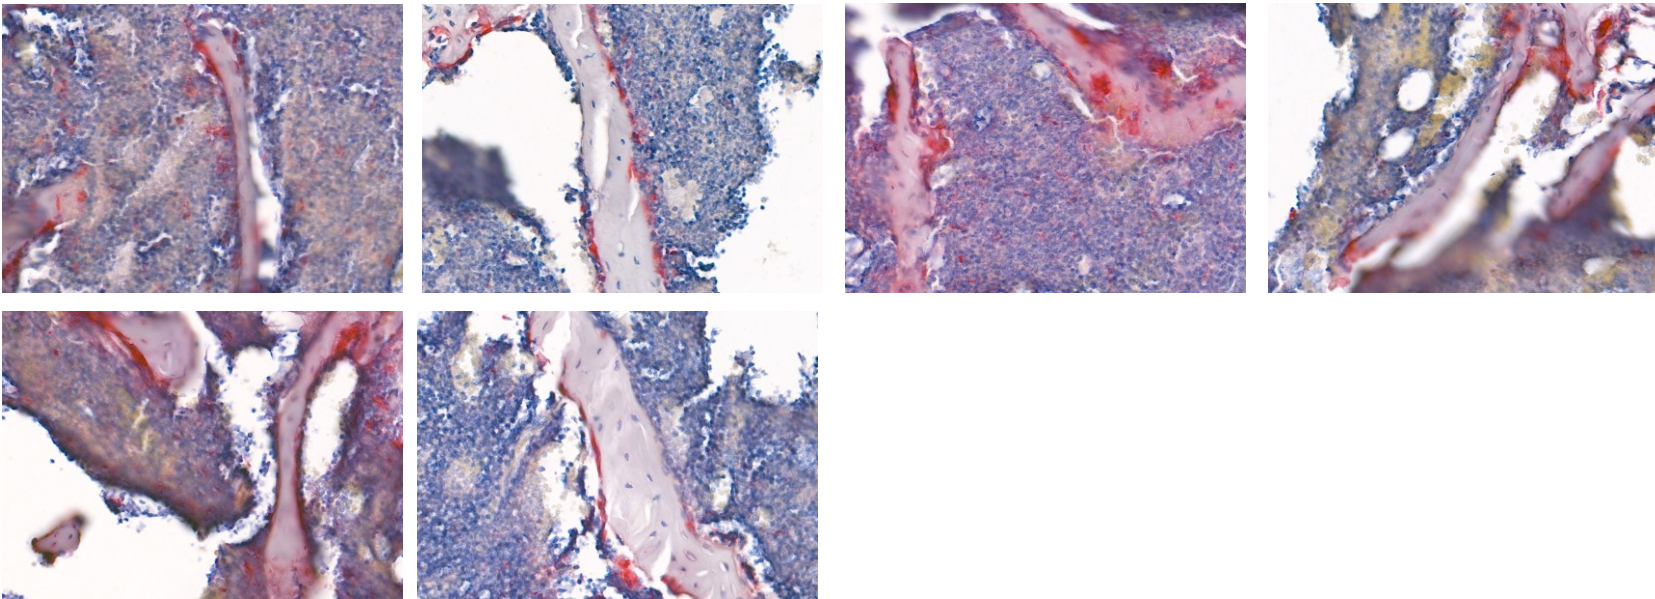

OVX shSIRT2-shLRG1-sEVs

**Figure.4k** TRAP staining on paraffin-embedded femur sections in each group after corresponding sEVs treatment

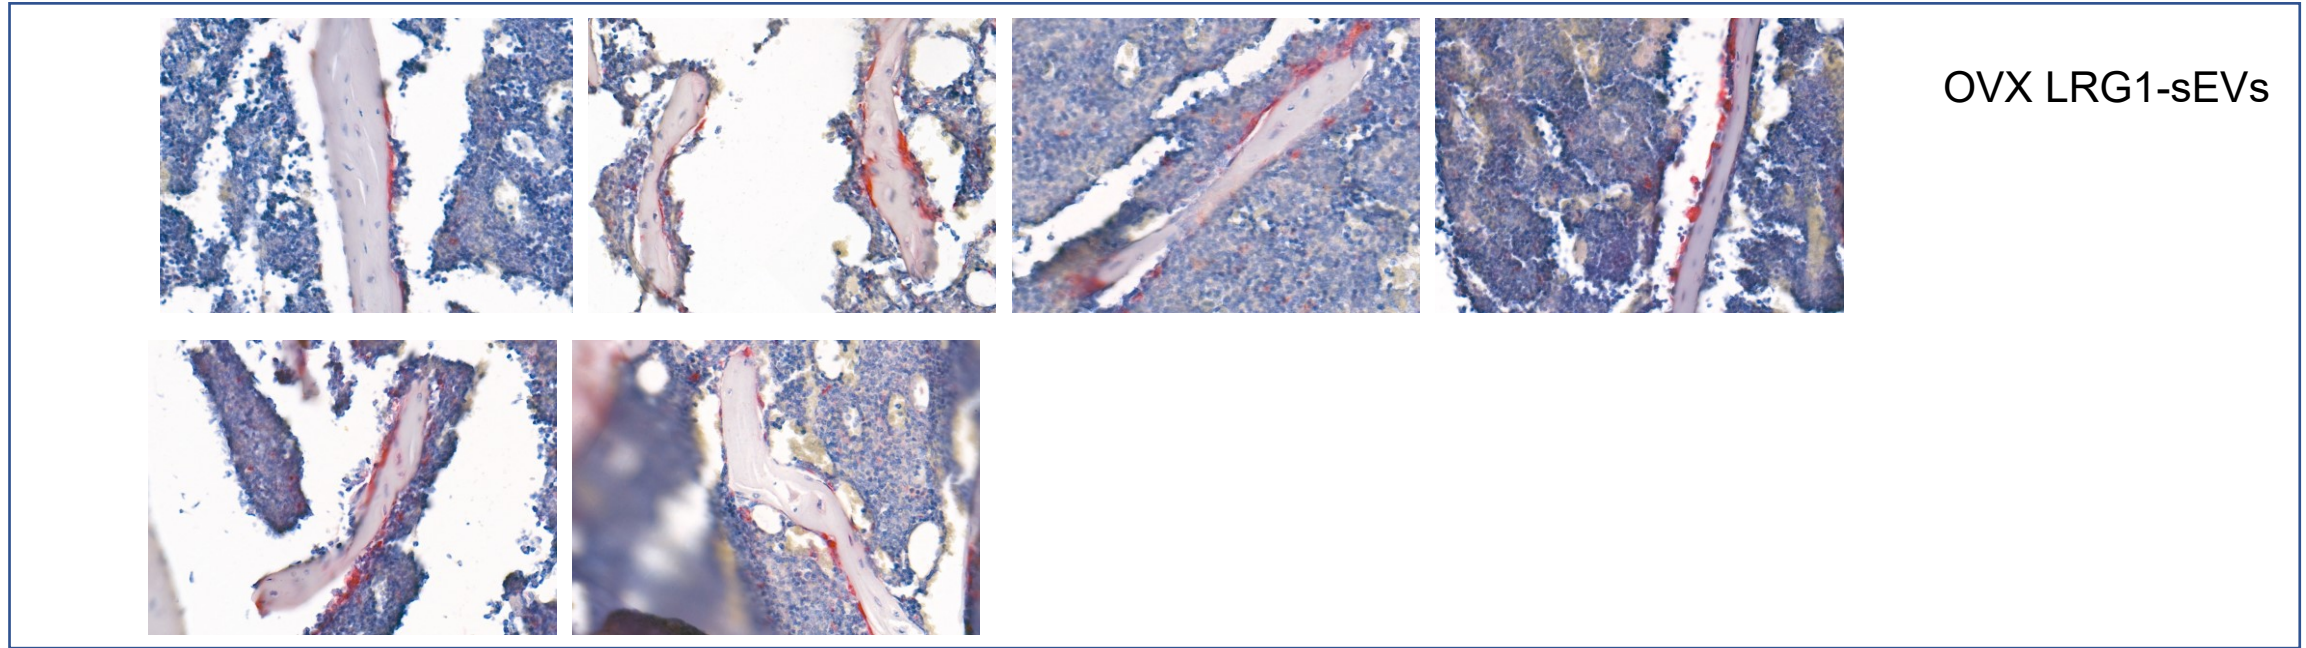

**Figure. 5b**

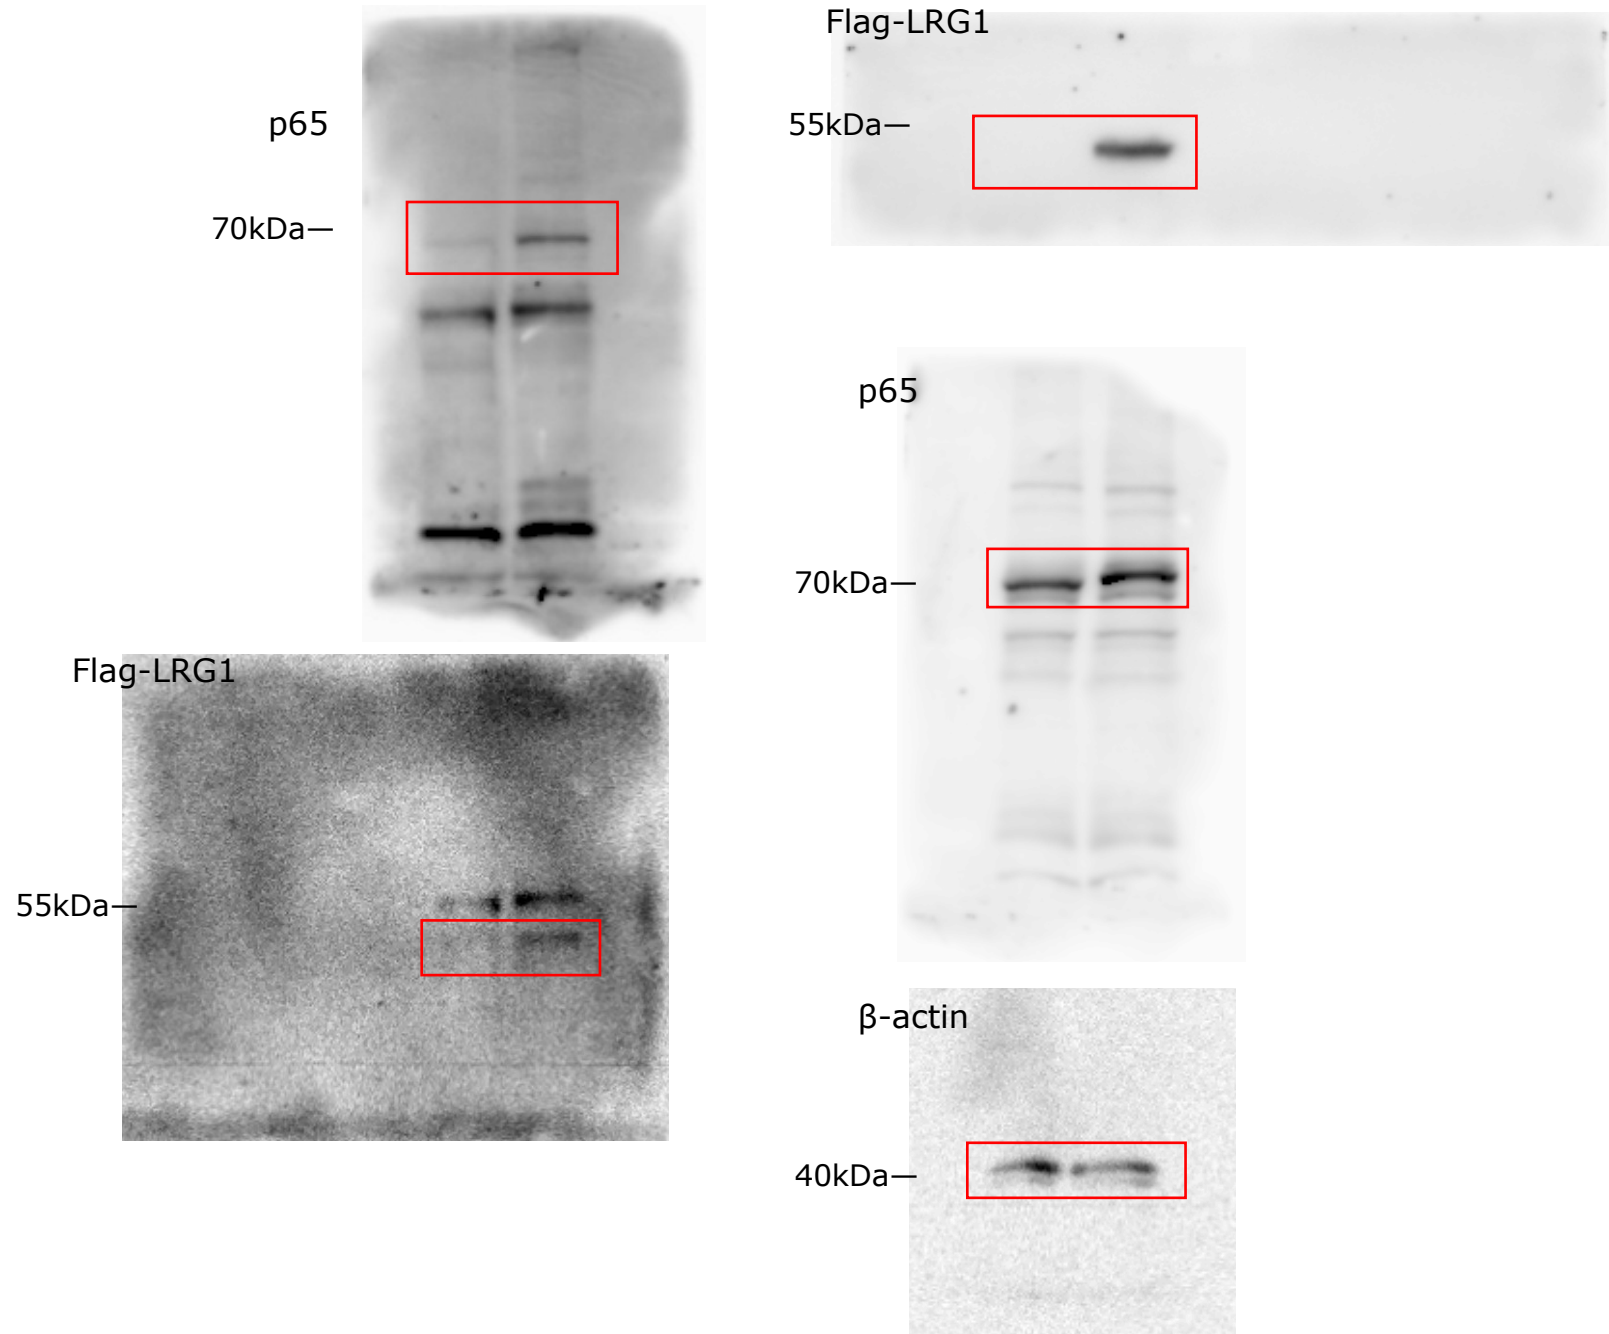



**Figure. 5c**

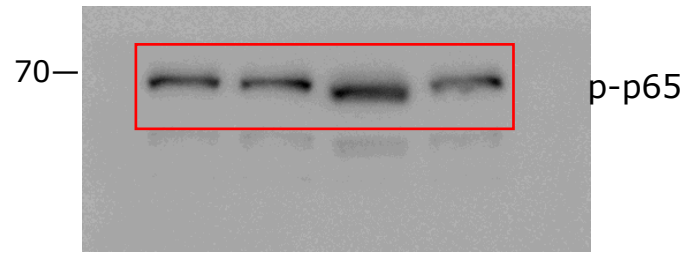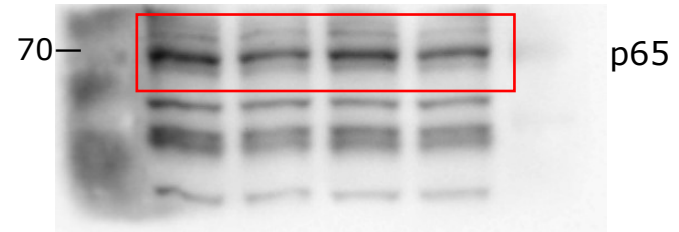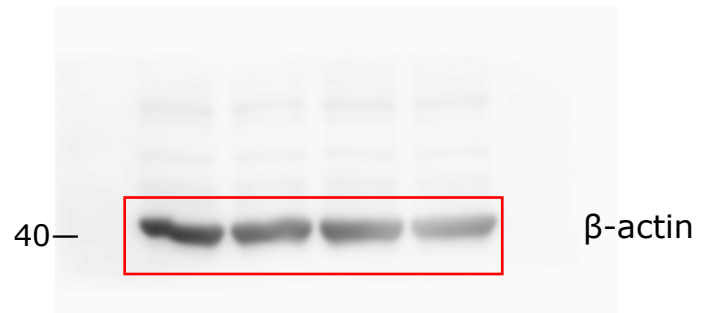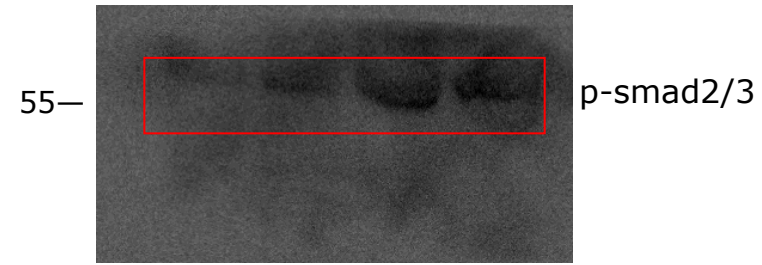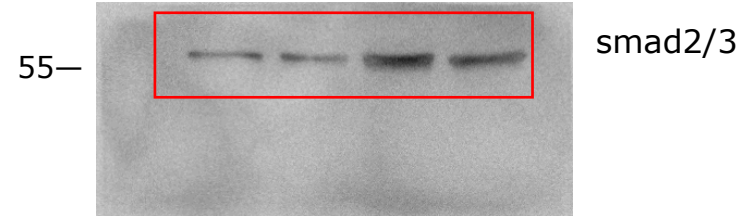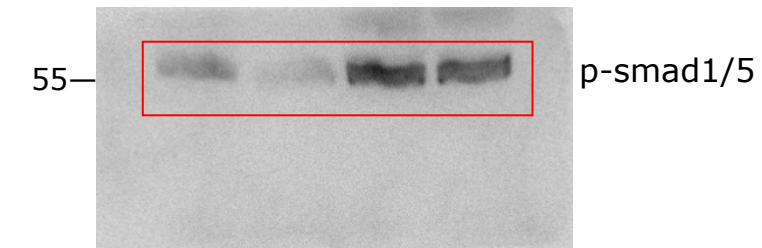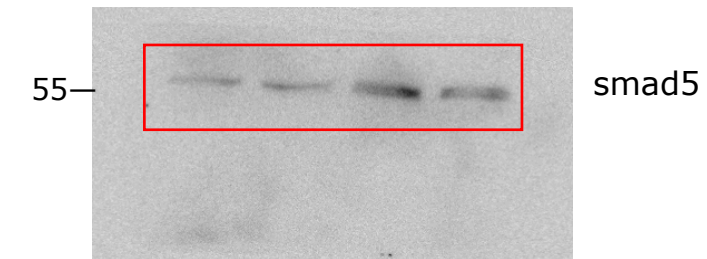

**Figure. 5f**

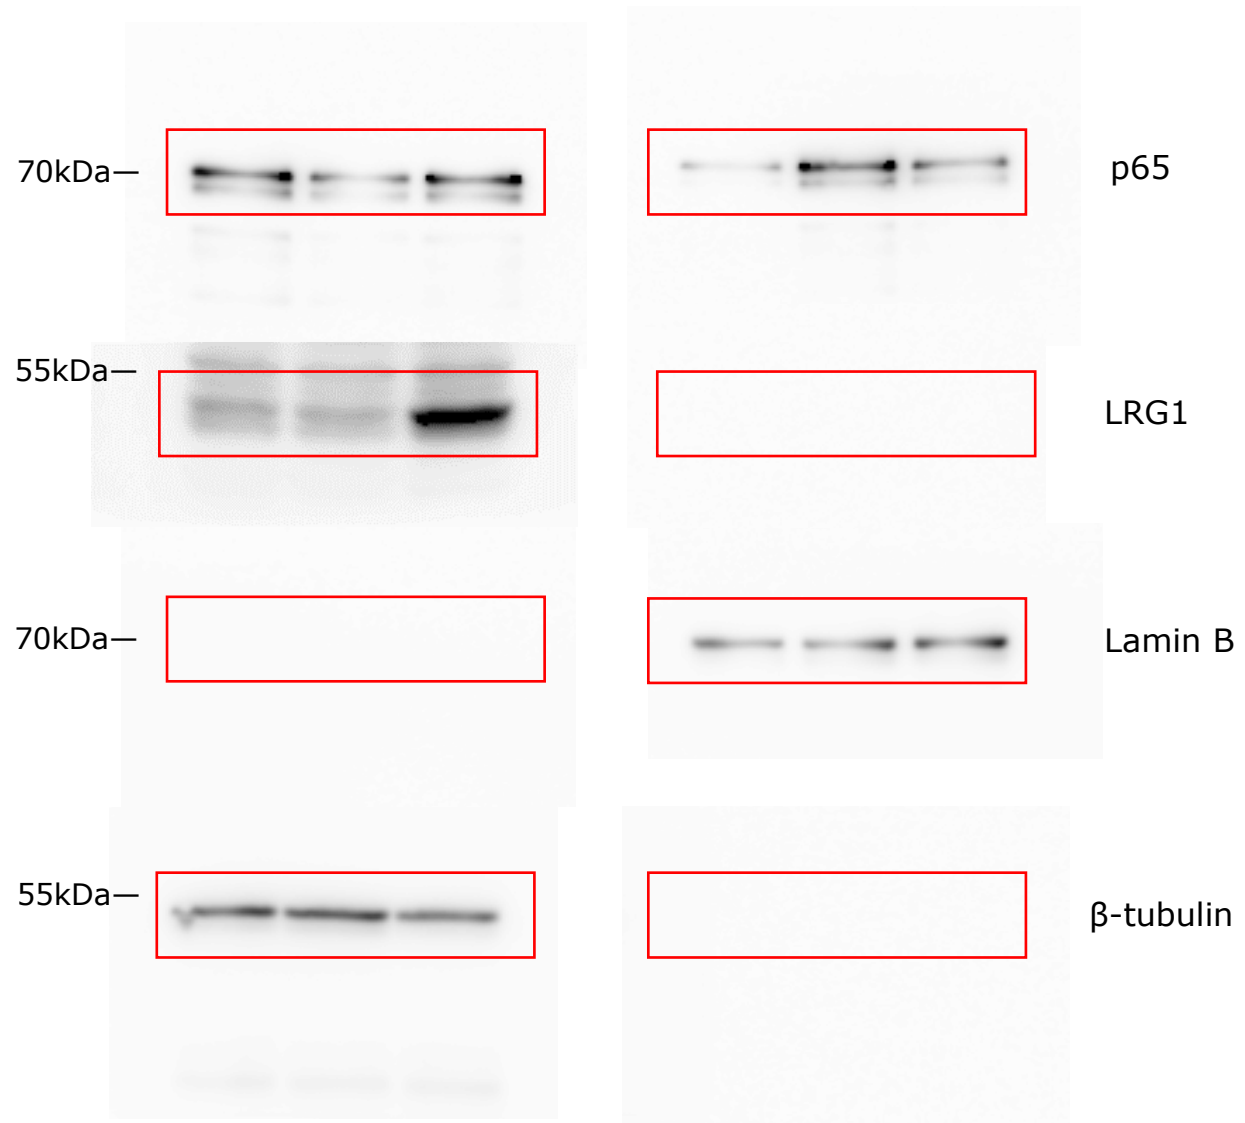

**Figure.5d** Immunofluorescence analysis of p65 (red) location in RANKL-induced BMDMs treated with LRG1-GFP-sEVs

CTRL

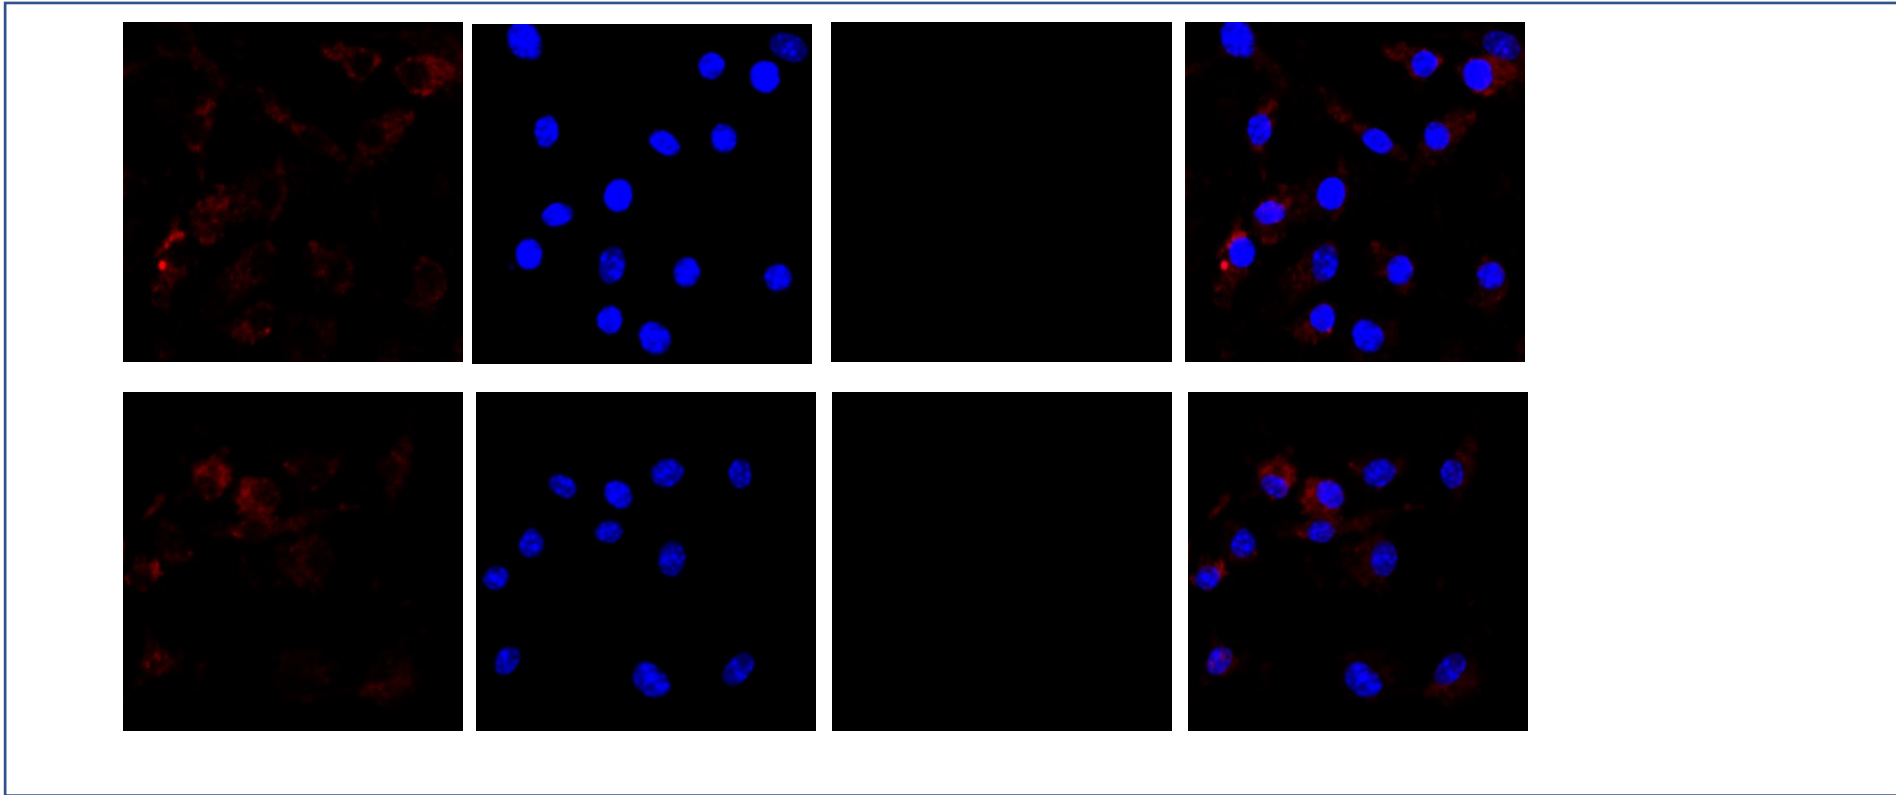

Figure.5d

RANKL

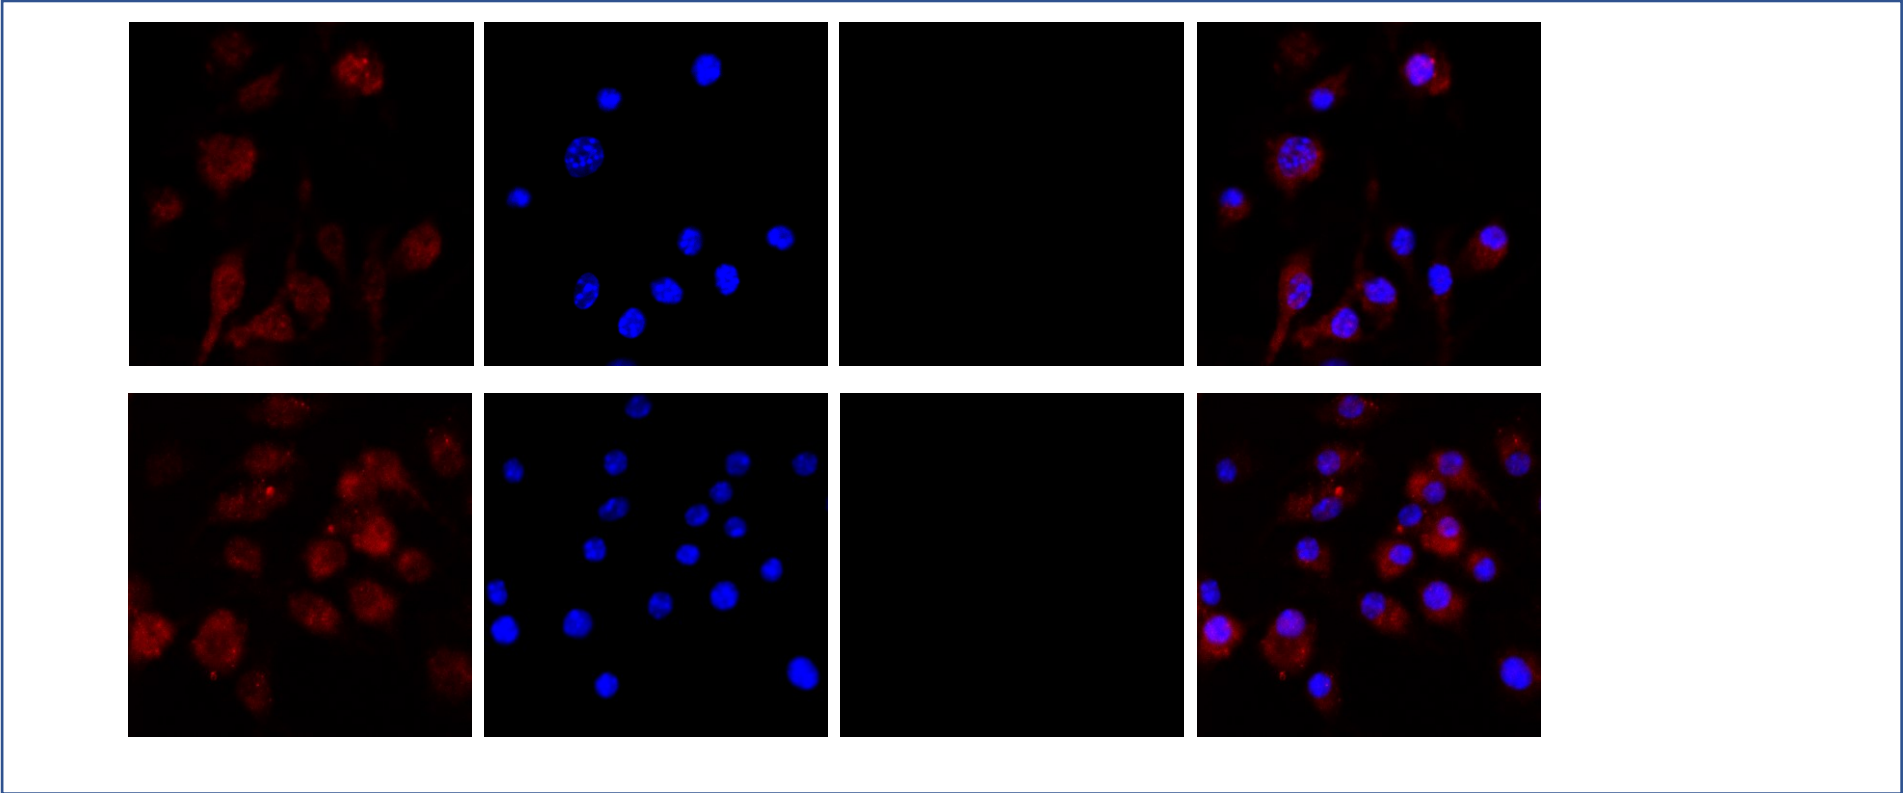

Figure.5d

RANKL+GPF-LRG1-sEVs

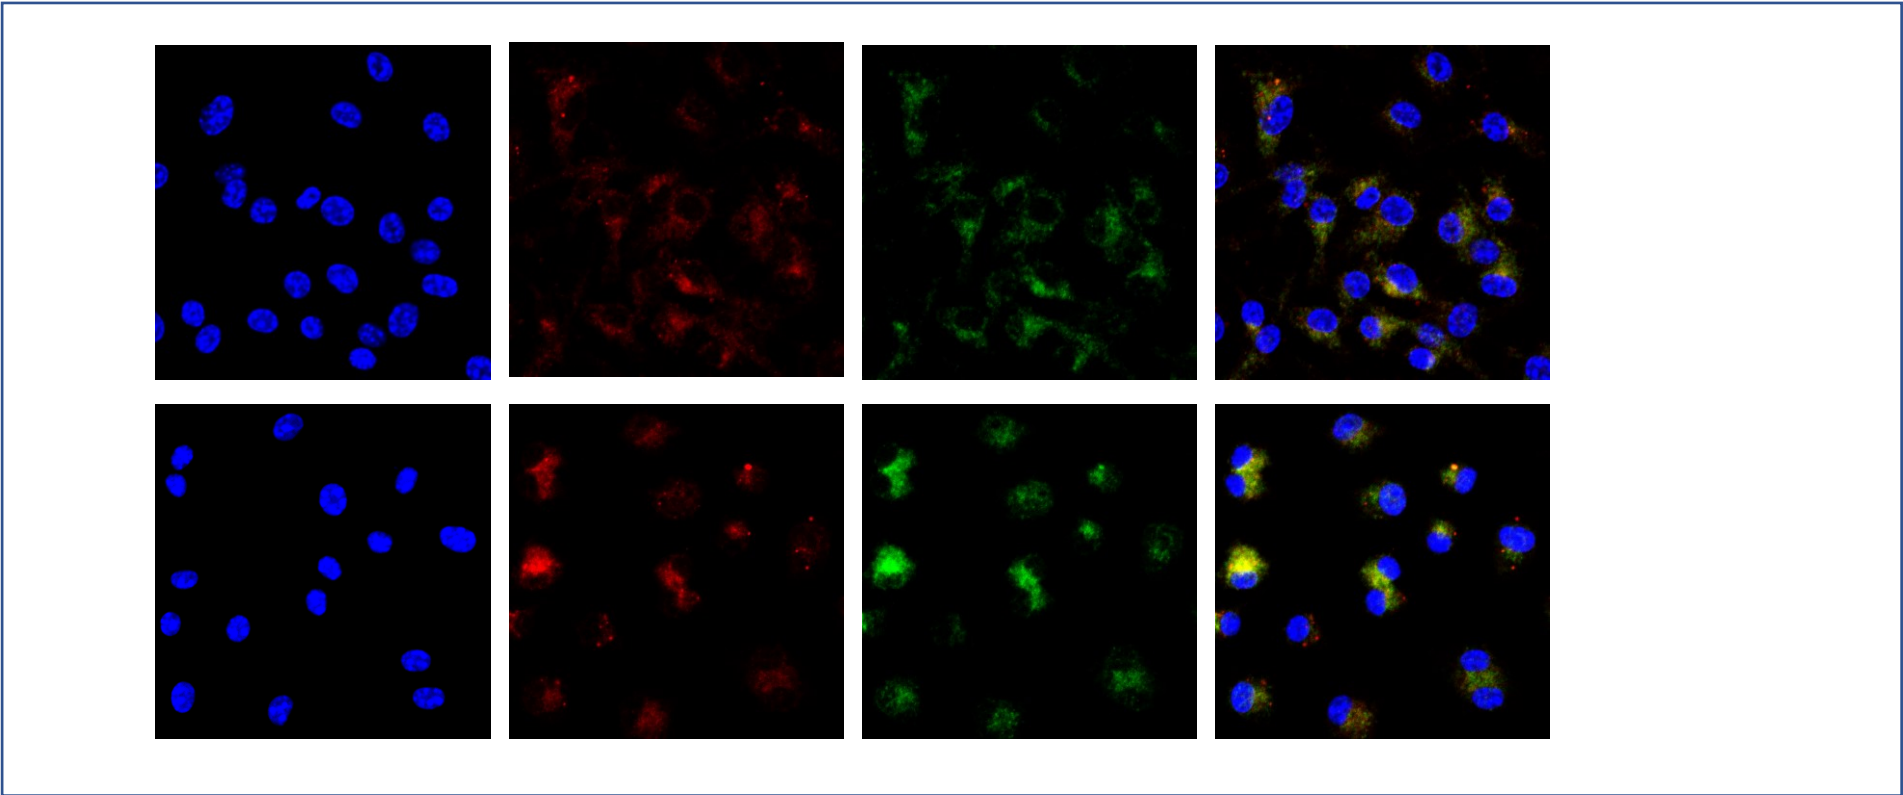

**Figure.5g** immunofluorescence images of primary BMDMs isolated from aged mice

Aged female mice *Loxp*

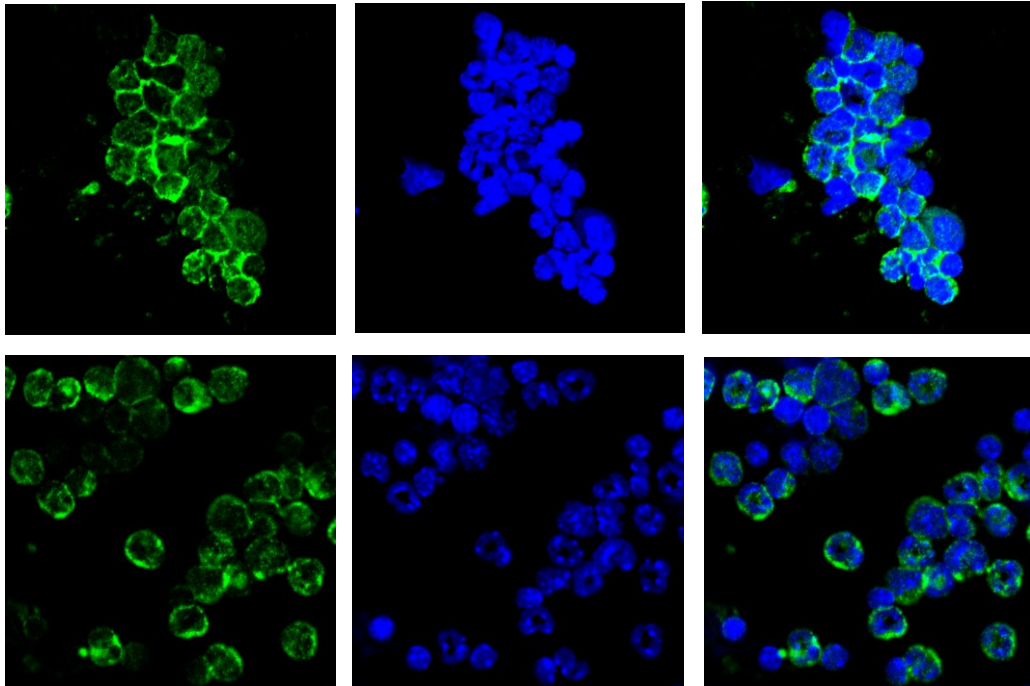

Aged female mice *SIRT2-KO* hep

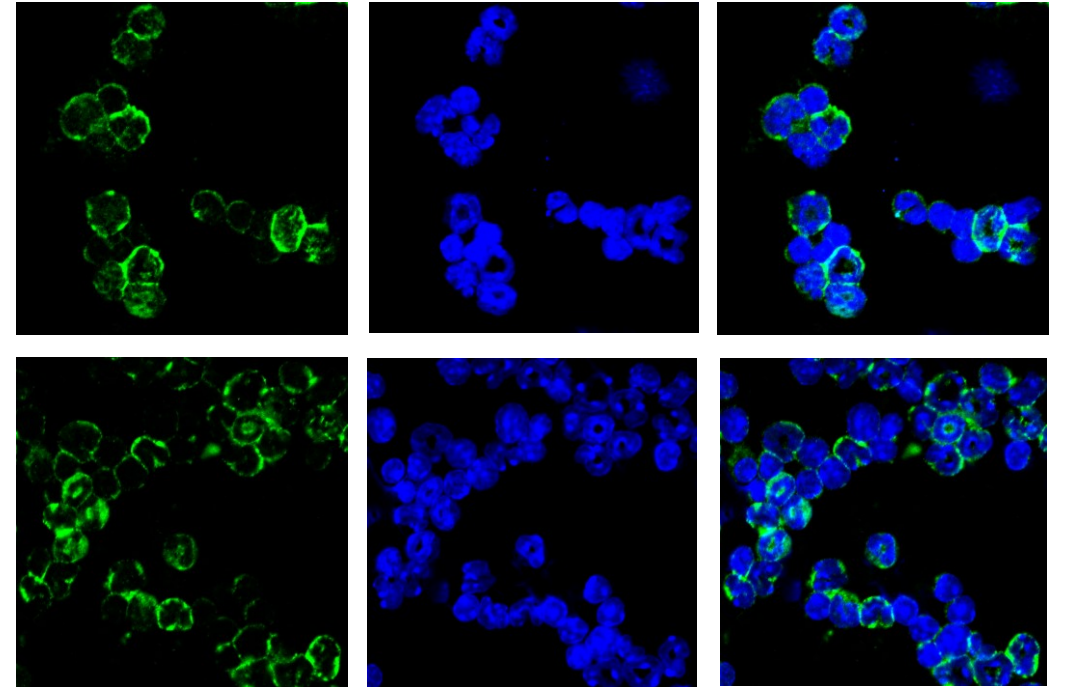

**Figure.5i** immunofluorescence images of primary BMDMs isolated from aged mice

Aged male mice Loxp

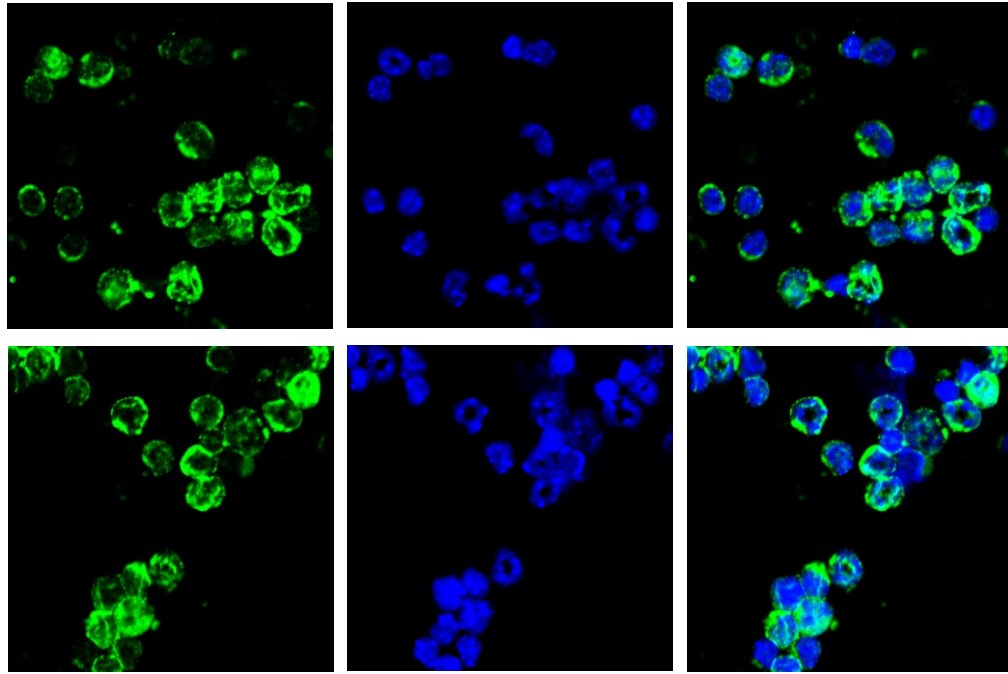

Aged male mice SIRT2-KOhep

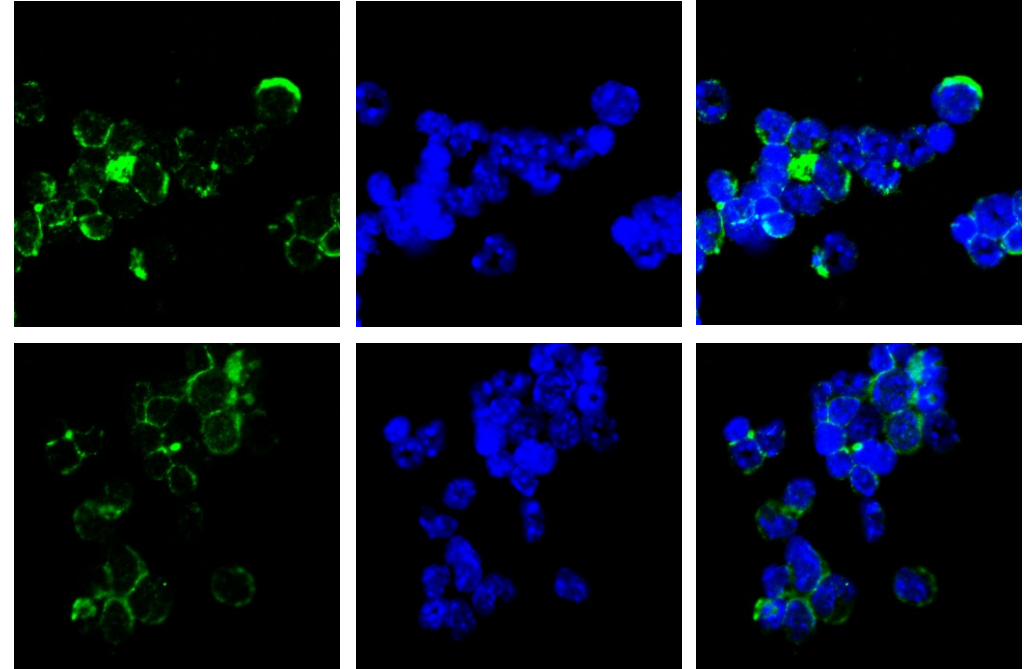

**Figure.5k**

TRAP staining of osteoclasts treated with LRG1-sEVs and the inhibitors of p65 nuclear translocation

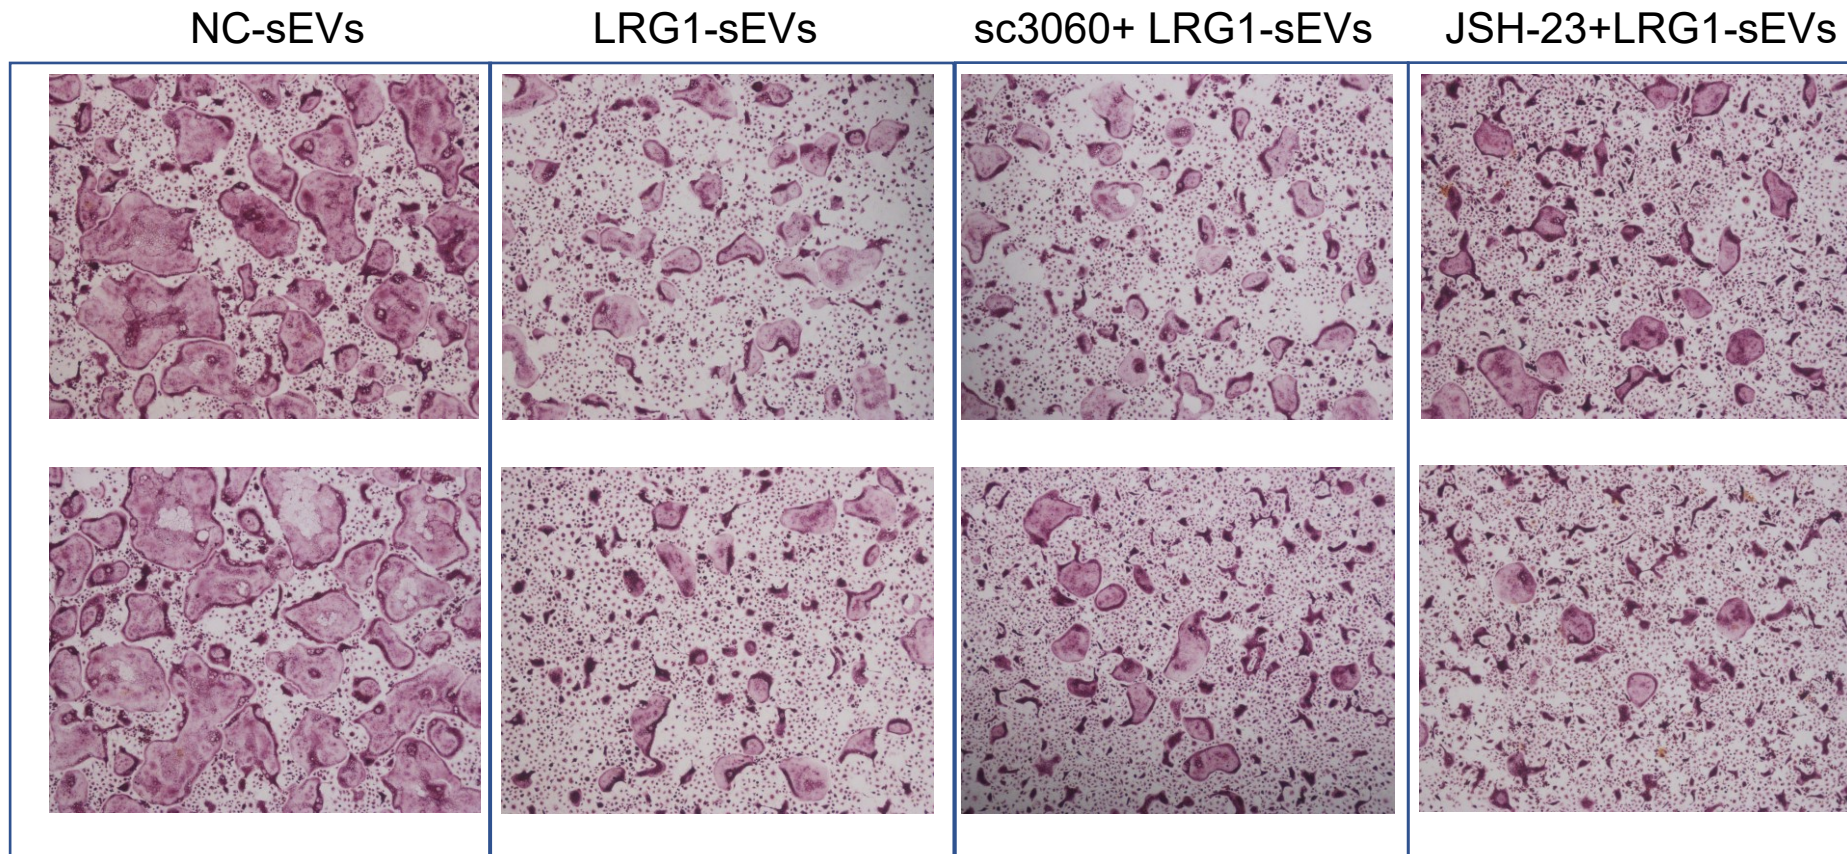



**Figure.5n**

TRAP staining of RAW264.7 cells overexpressed p65 and treated with LRG1-sEVs

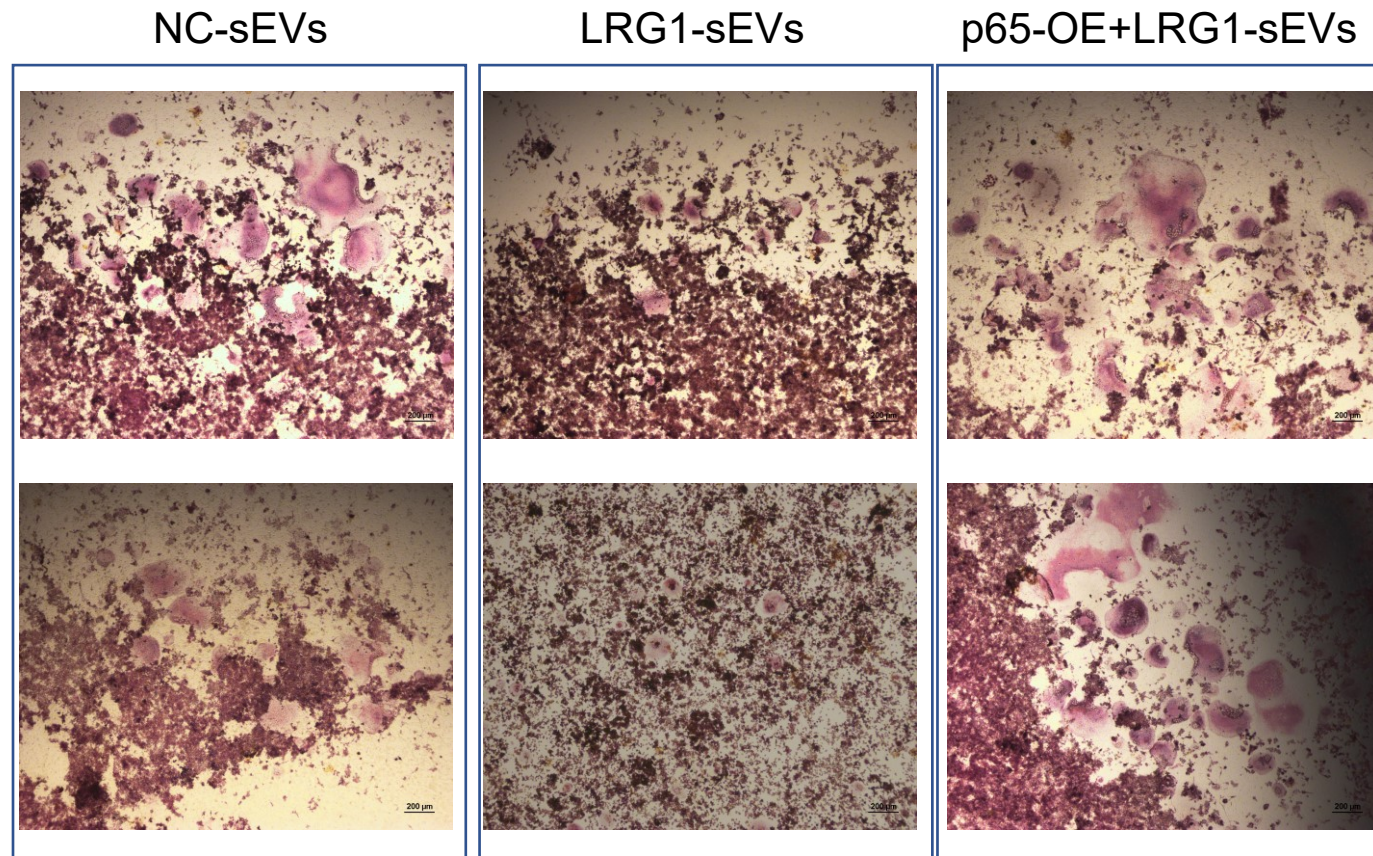

**Figure.6b**

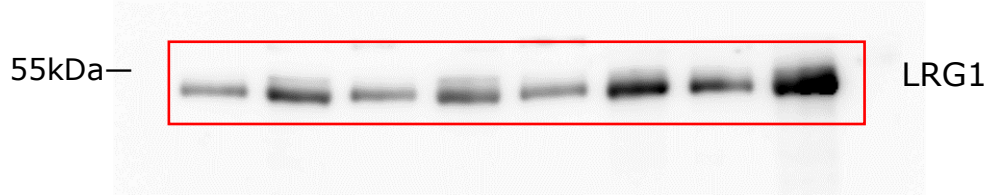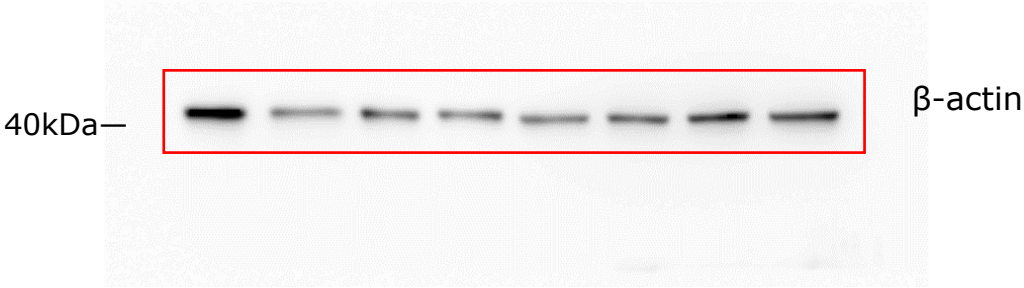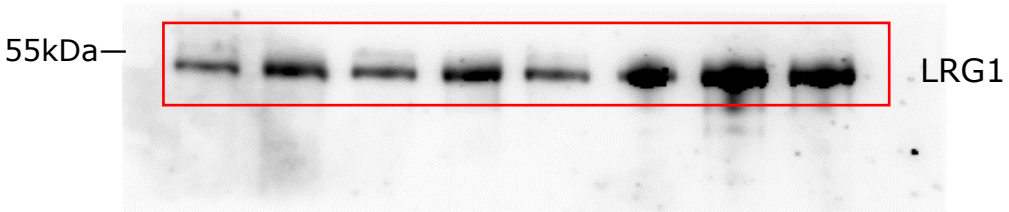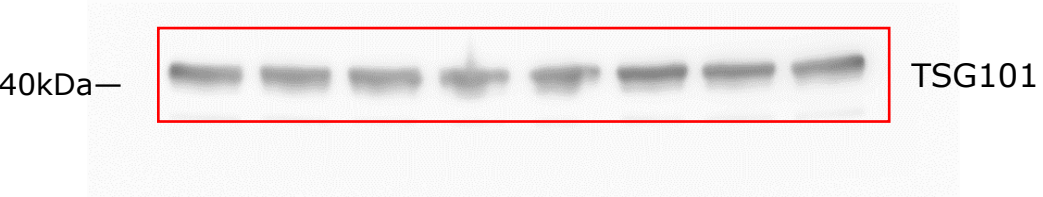

Figure.6c

sham

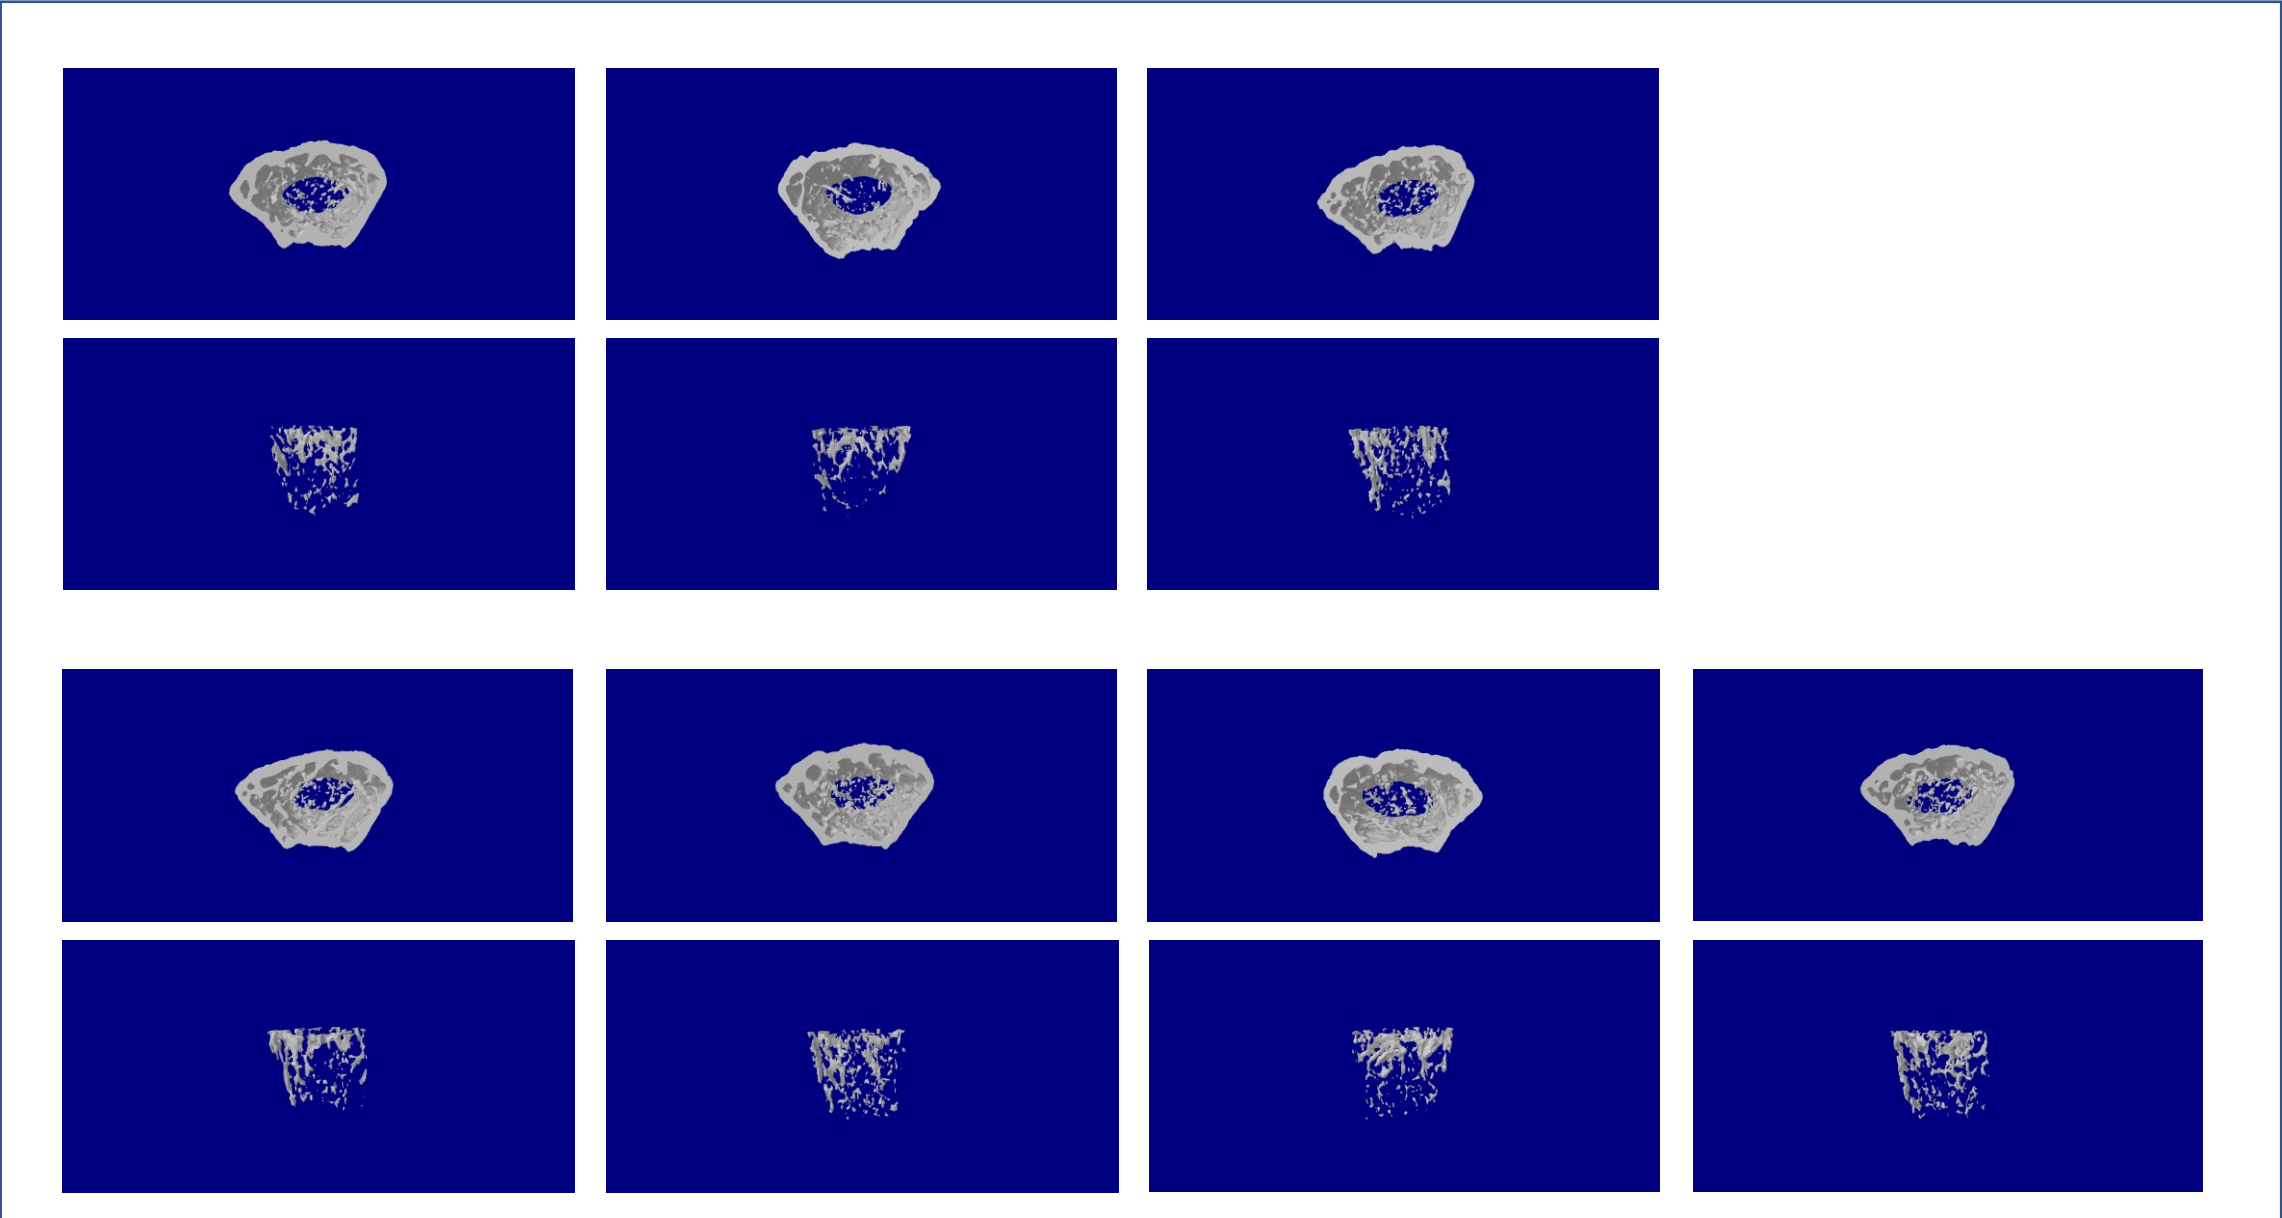

Figure.6c

OVX

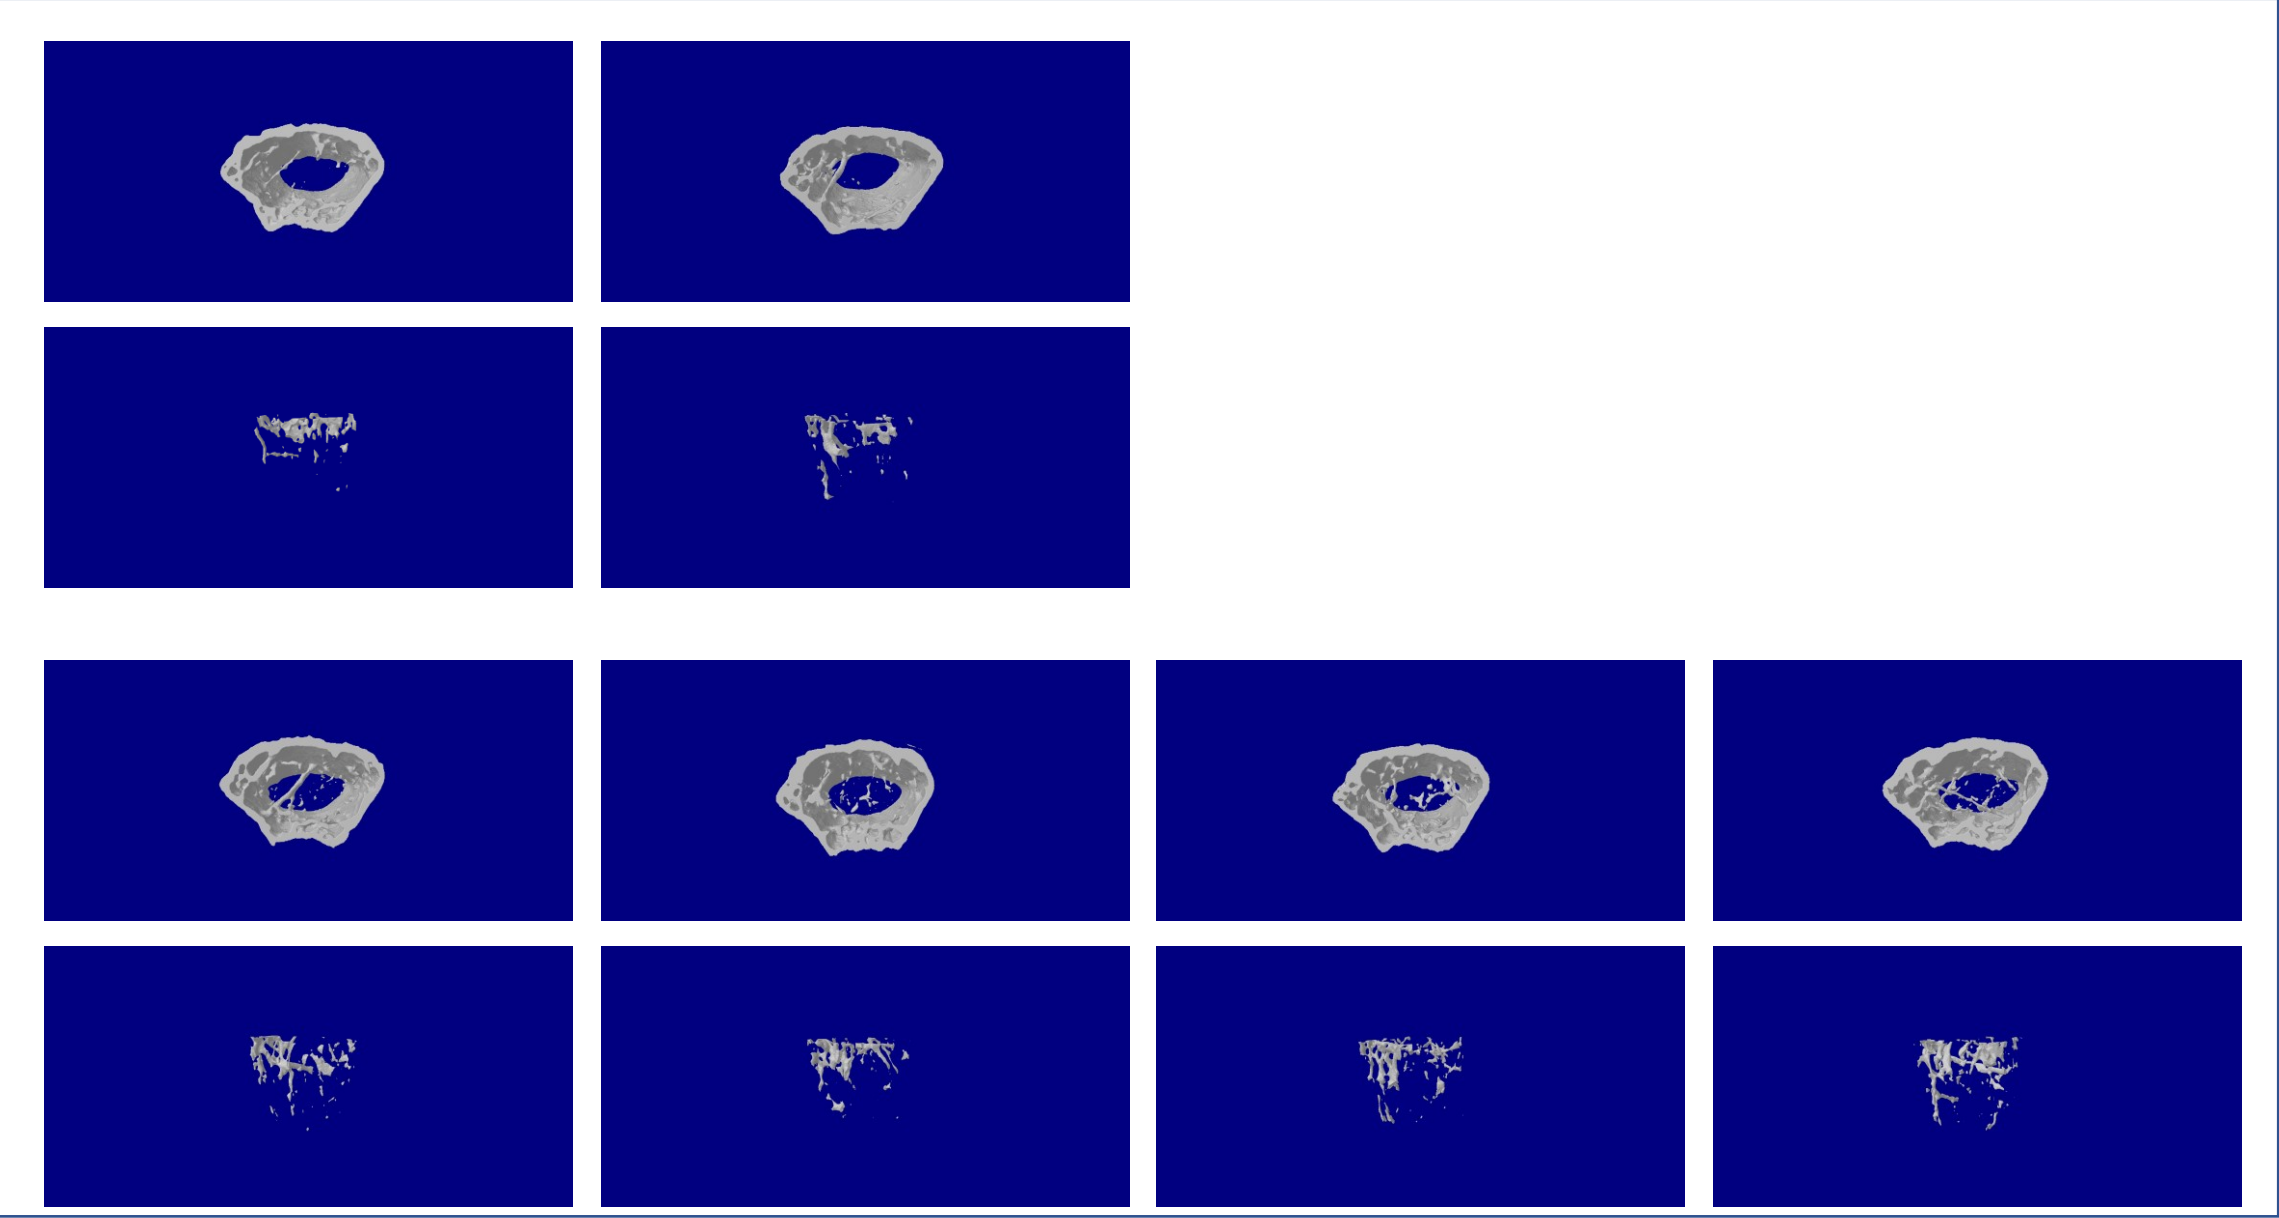

Figure.6c

OVX+AGK2

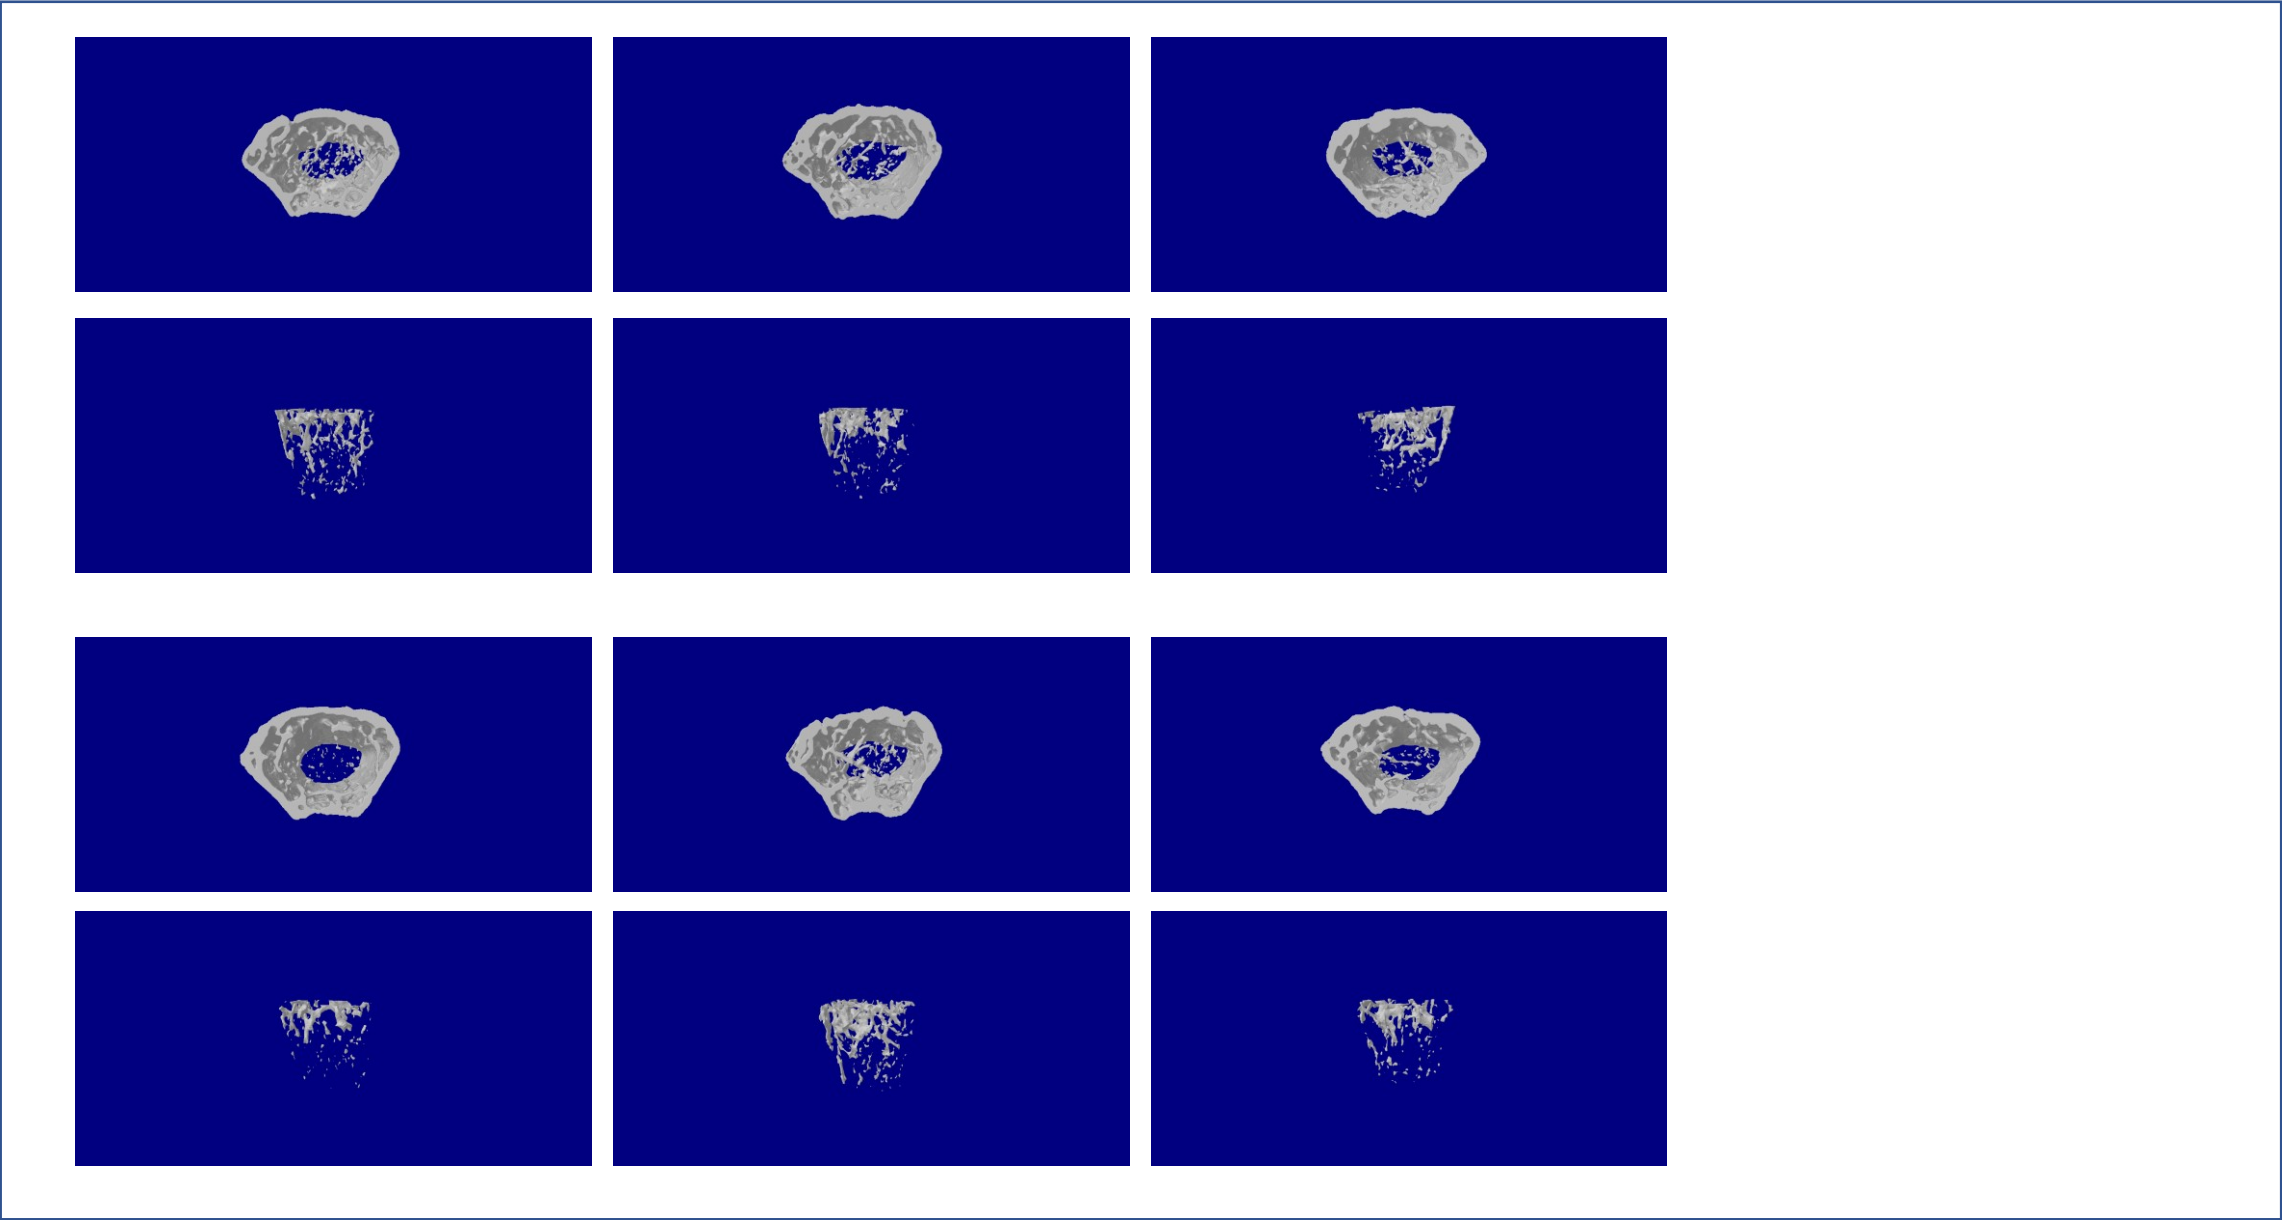

Figure.6e

OVX+Loxp

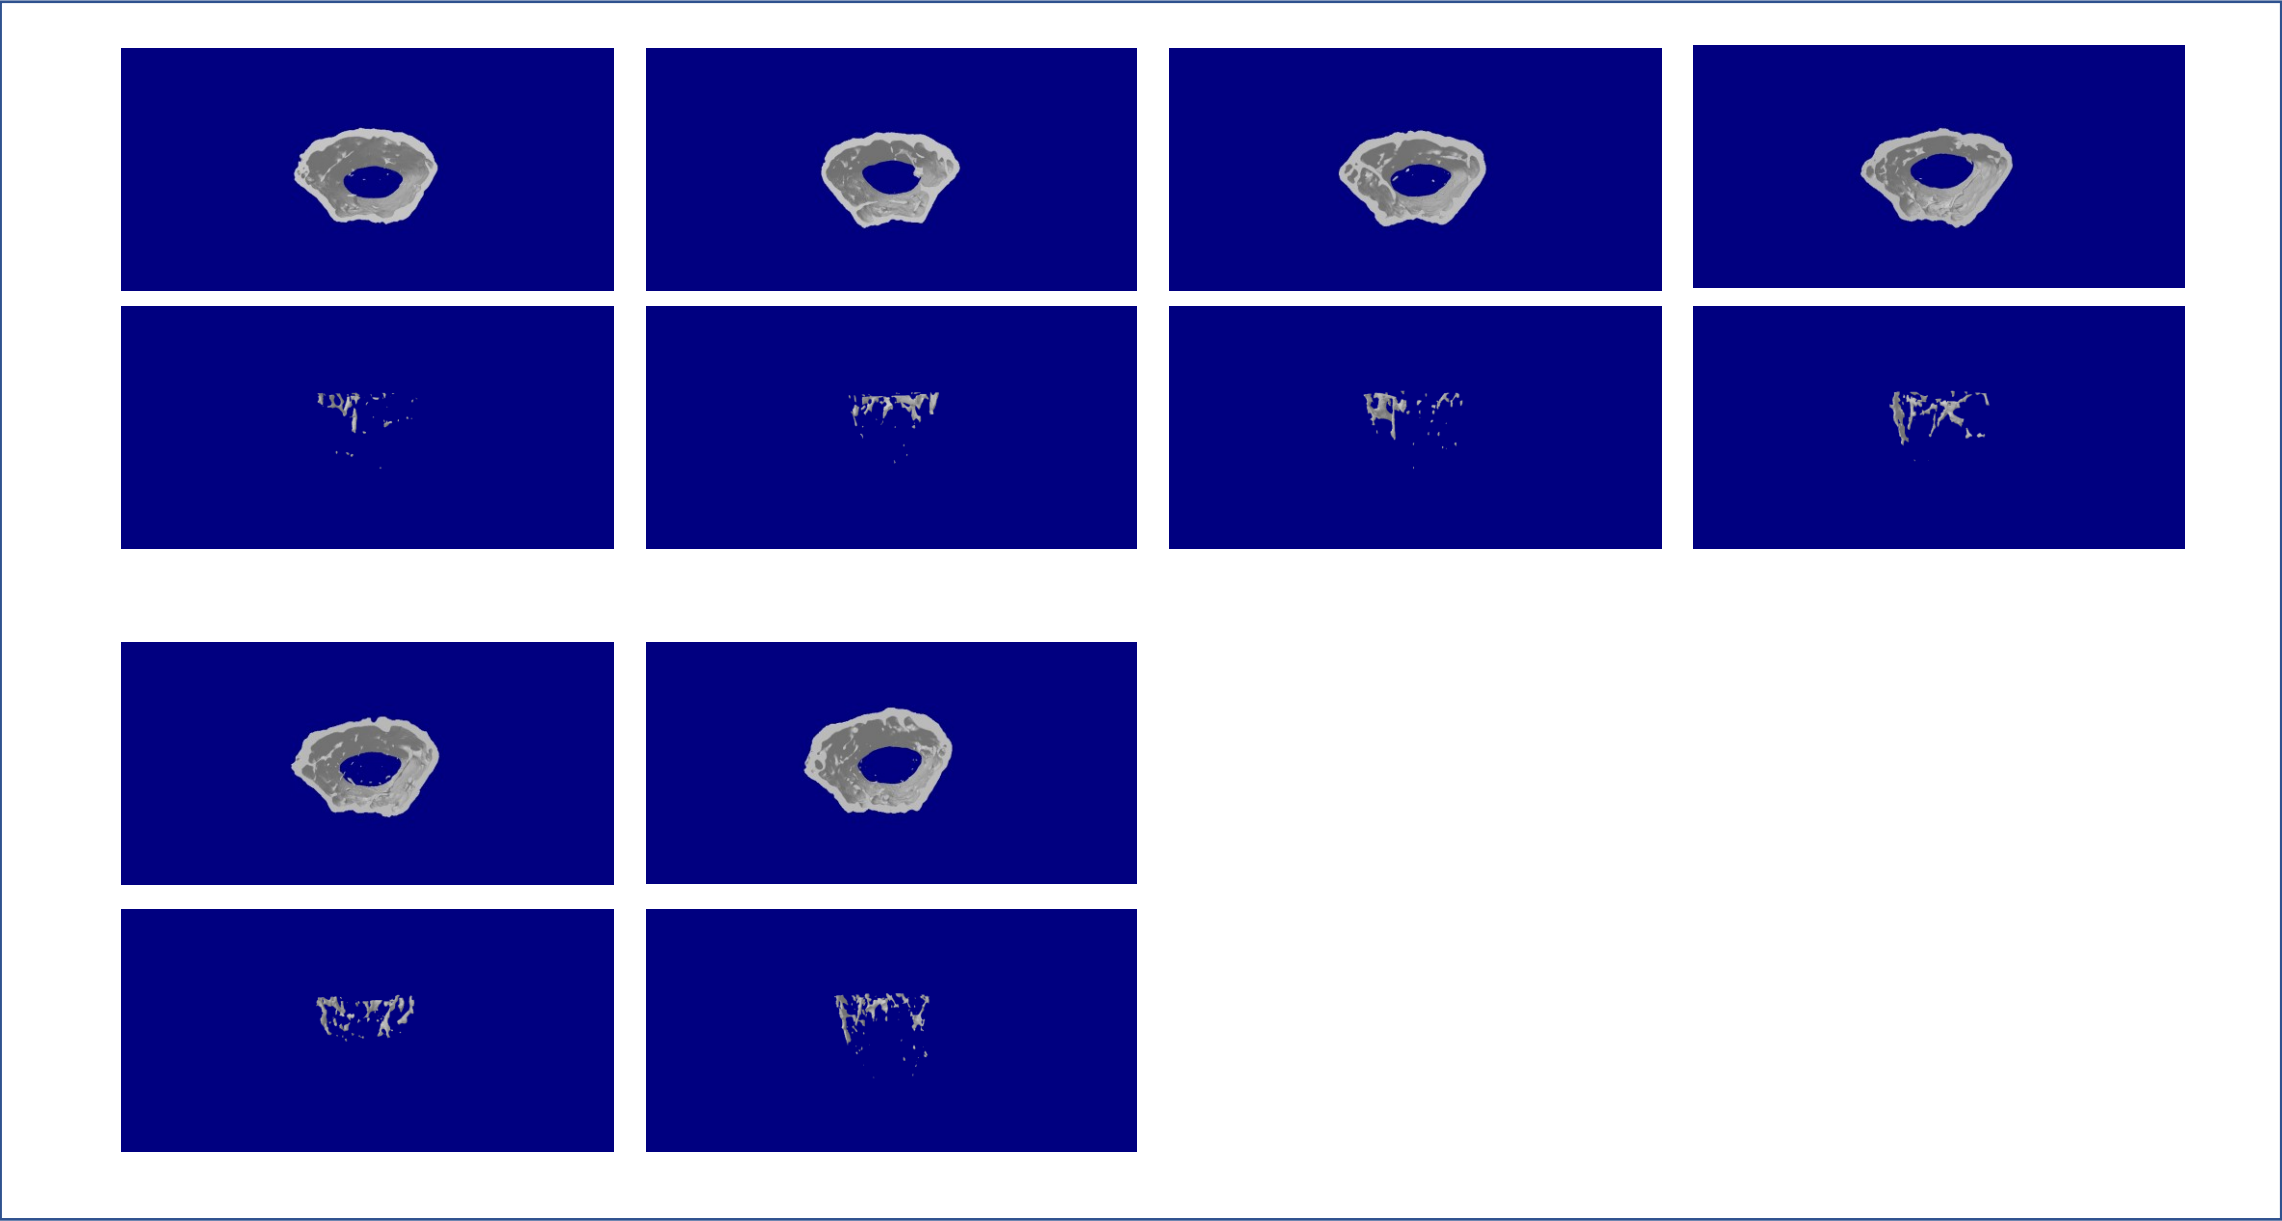

Figure.6e

OVX+SIRT2-KOhep

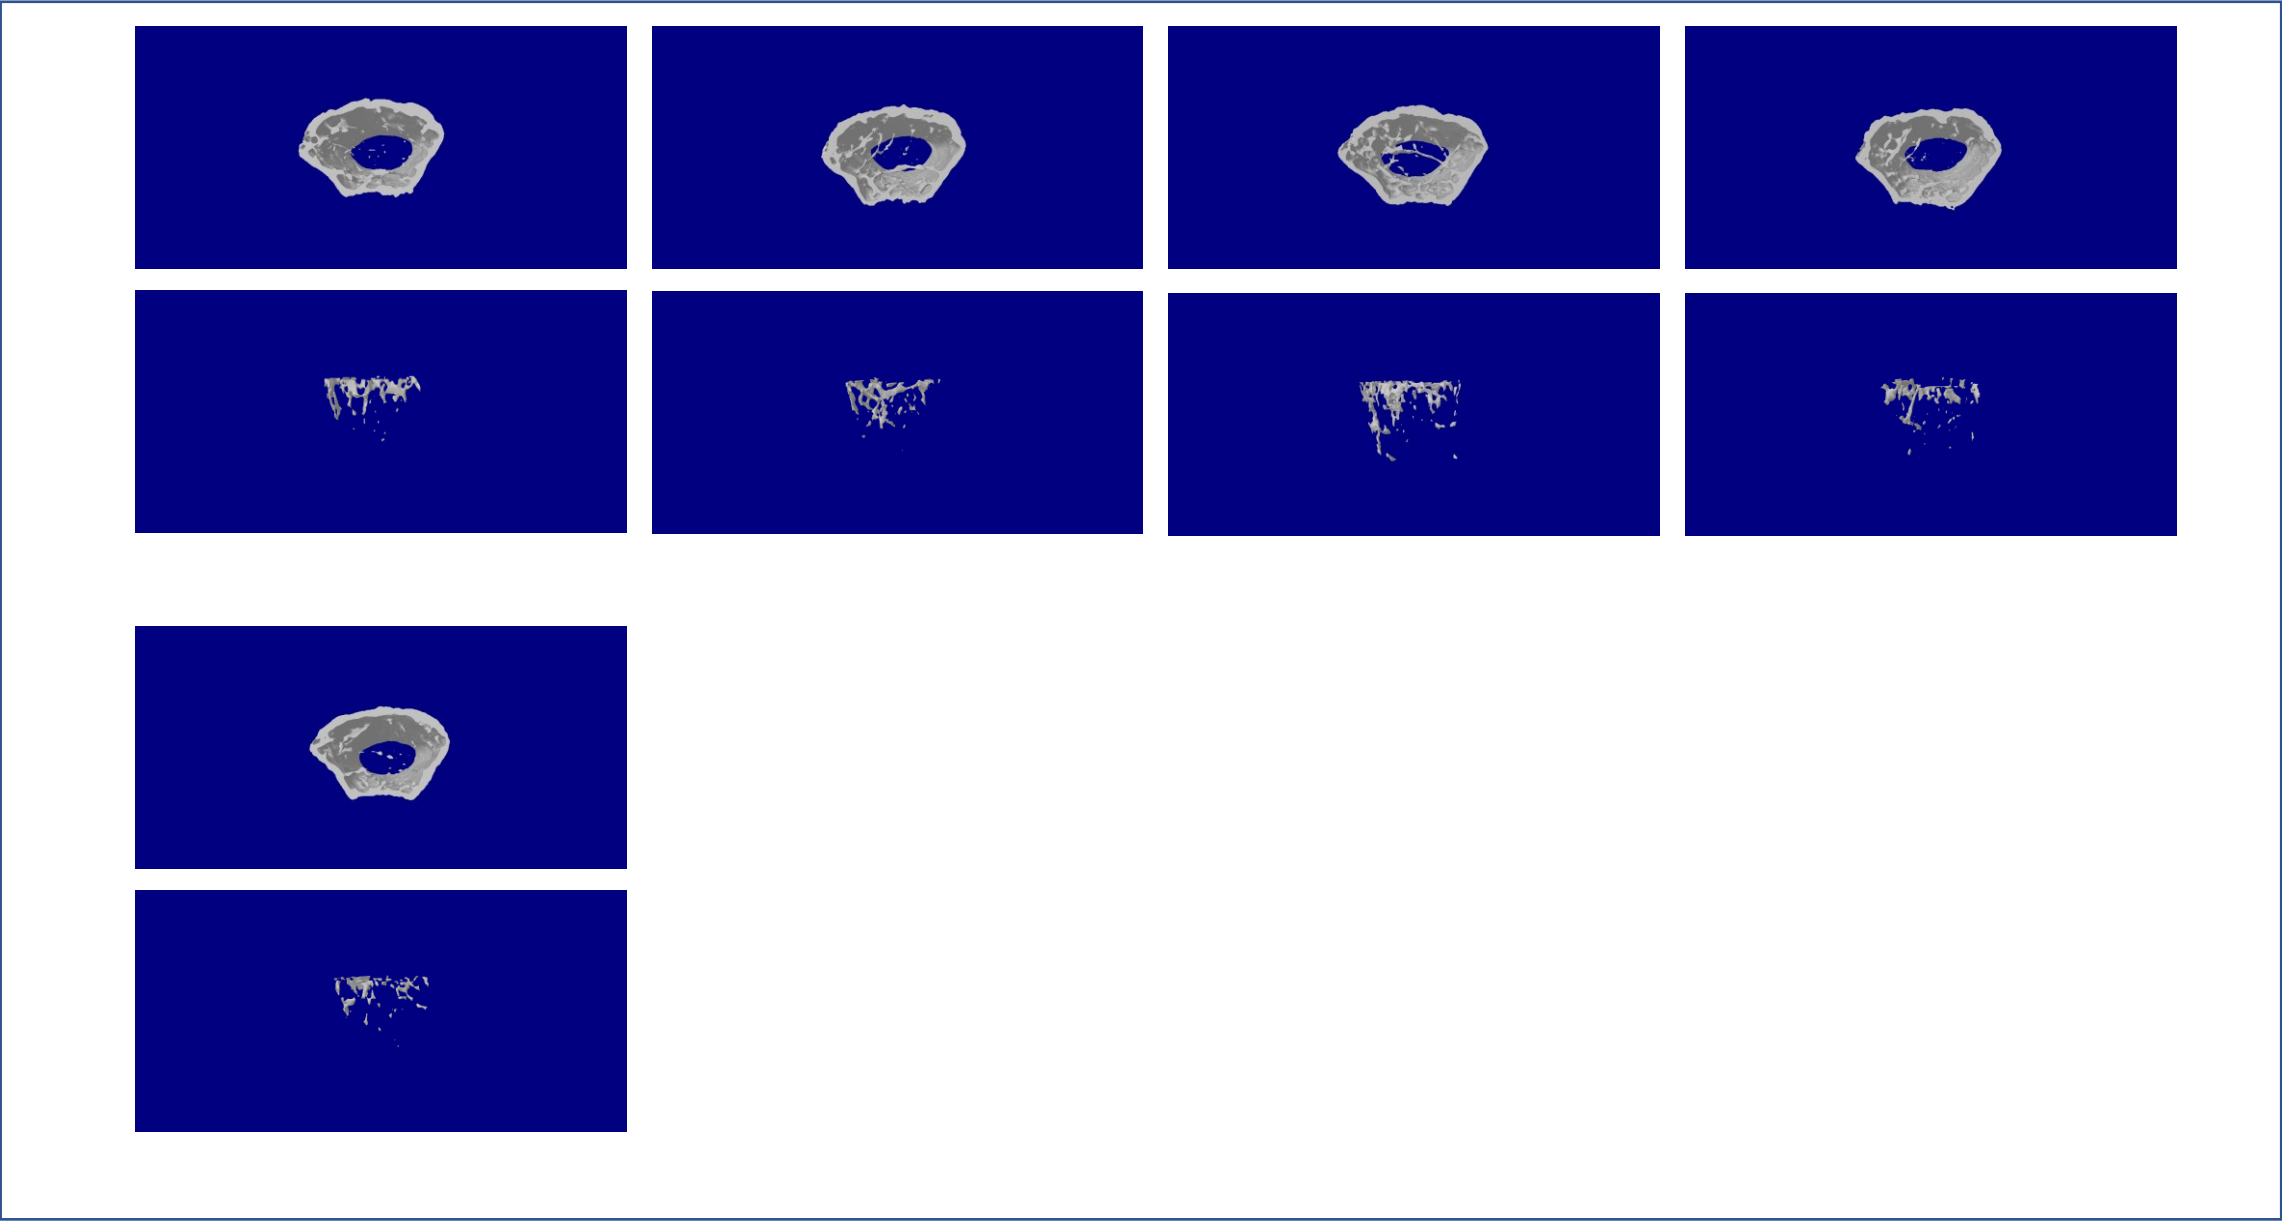

Figure.6e

OVX+SIRT2-Kohep+AGK2

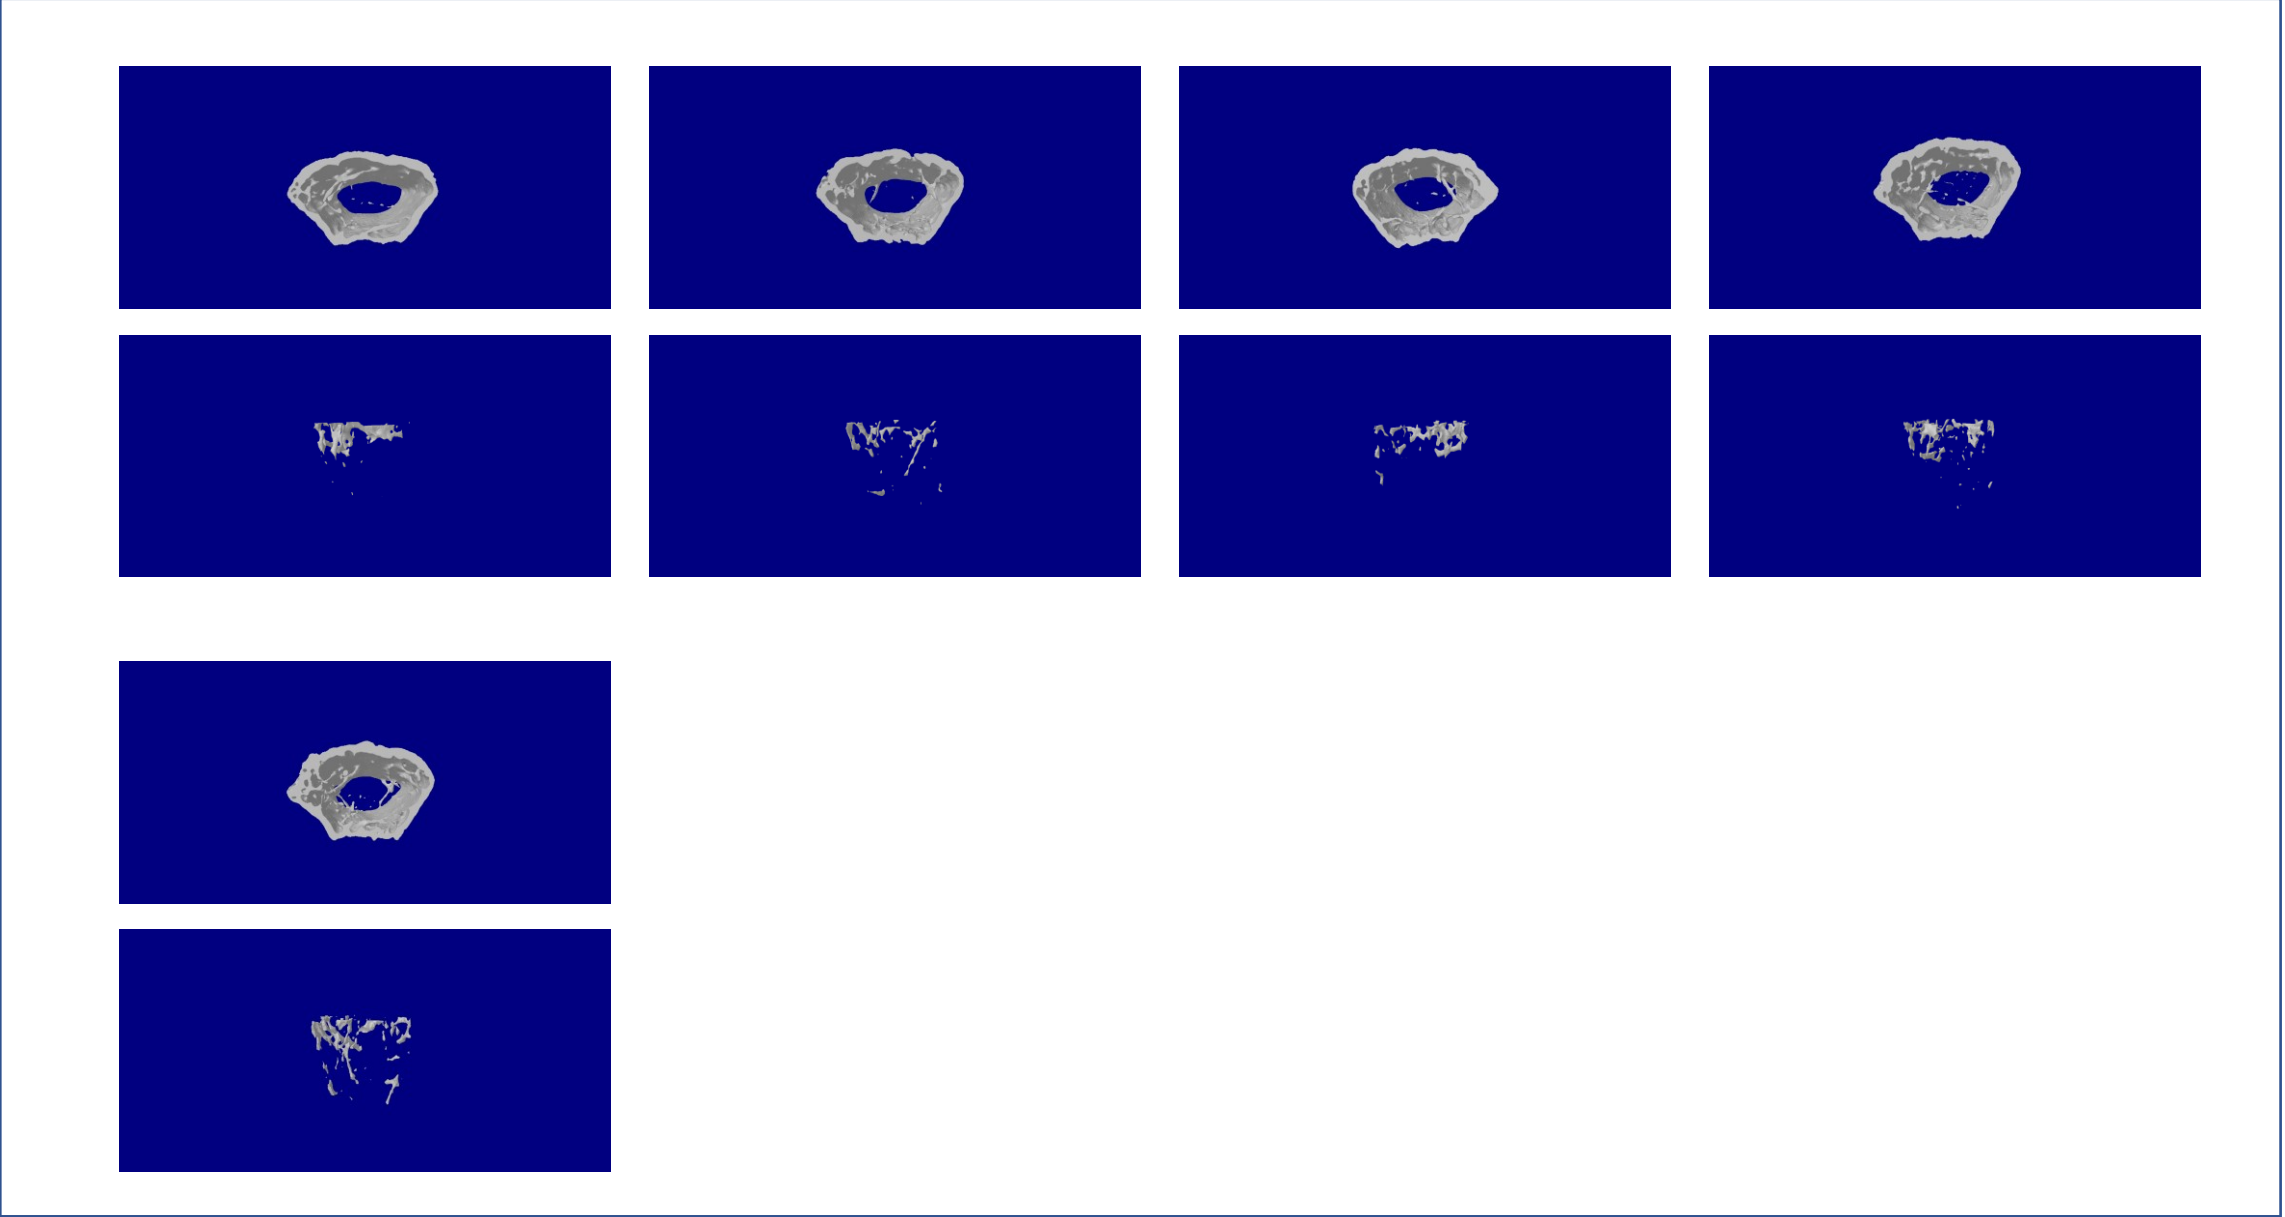



**Figure.7b**

TRAP staining images of human PBMCs cultured with RANKL and sEVs

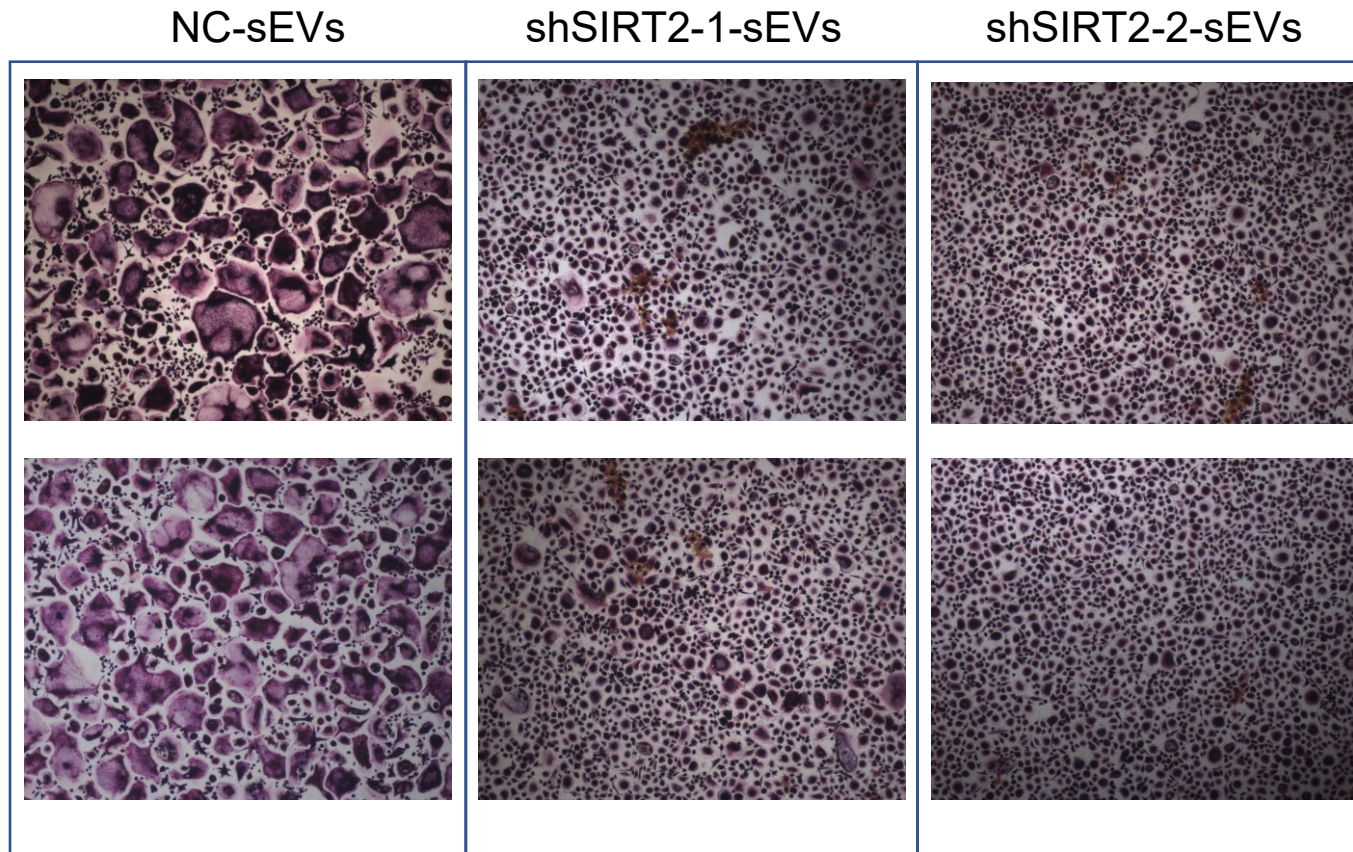

**Figure.7f**

TRAP staining images of human PBMCs cultured with RANKL and sEVs

LRG1<sup>low</sup>-sEVs

LRG1<sup>high</sup>-sEVs

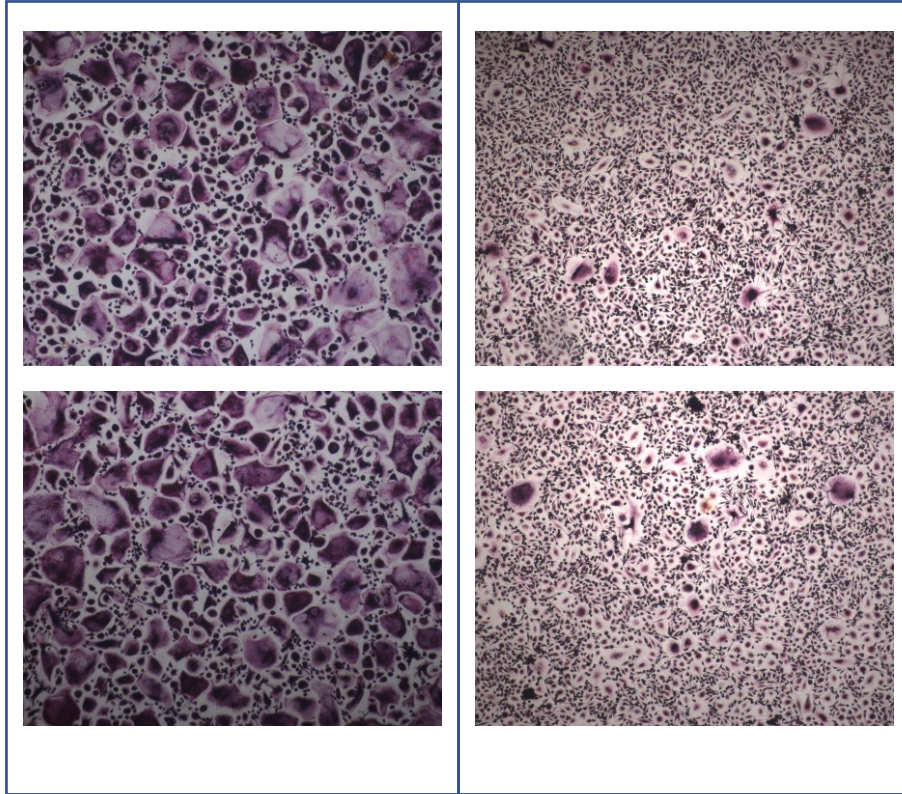

**Figure.7j**

TRAP staining images of PBMCs cultured with RANKL and sEVs-LRG1 or denosumab

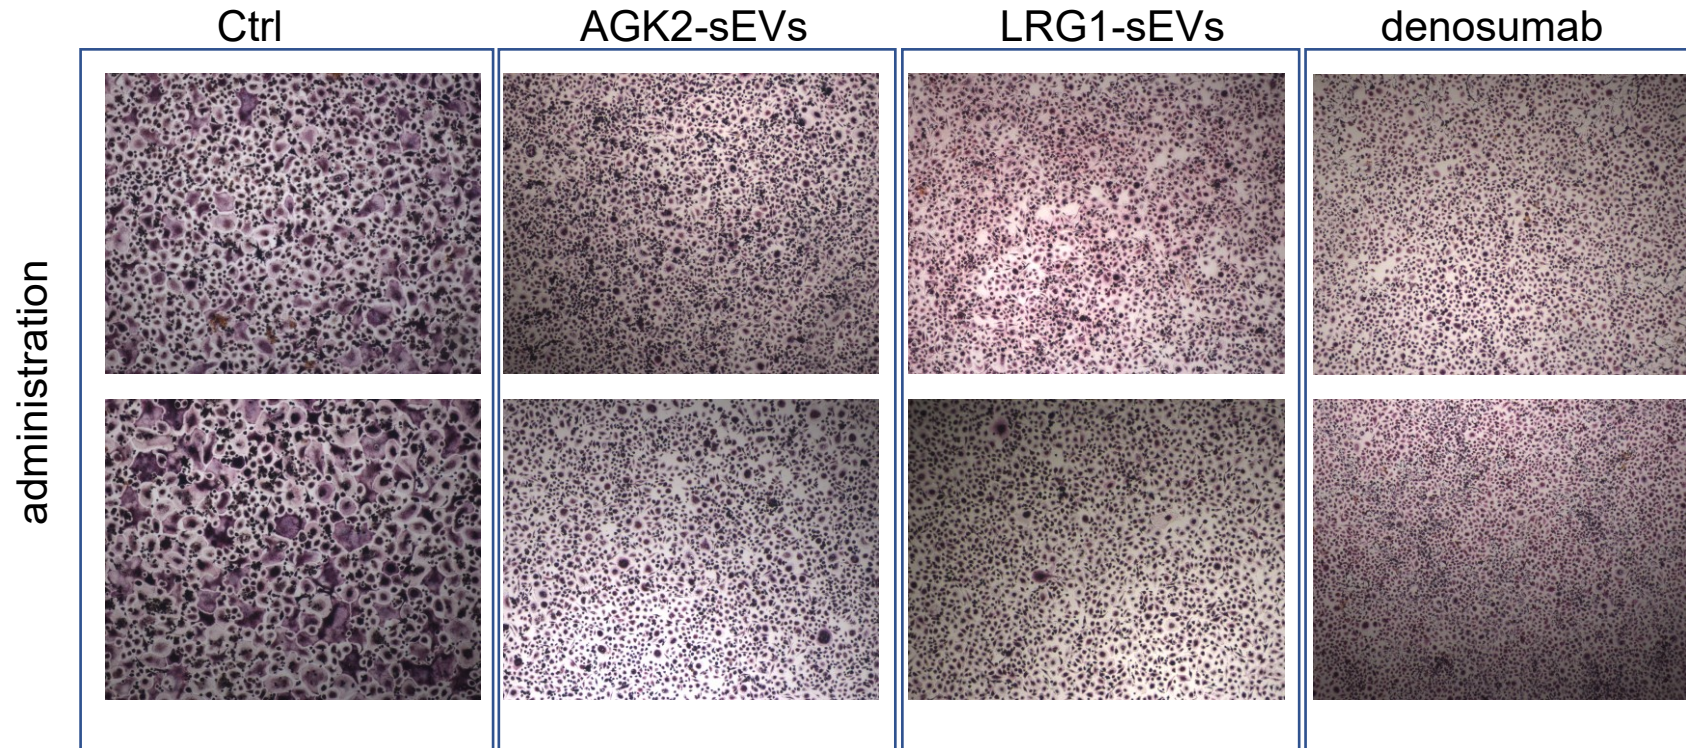

**Figure.7j**

TRAP staining images of PBMCs cultured with RANKL and sEVs-LRG1 or denosumab

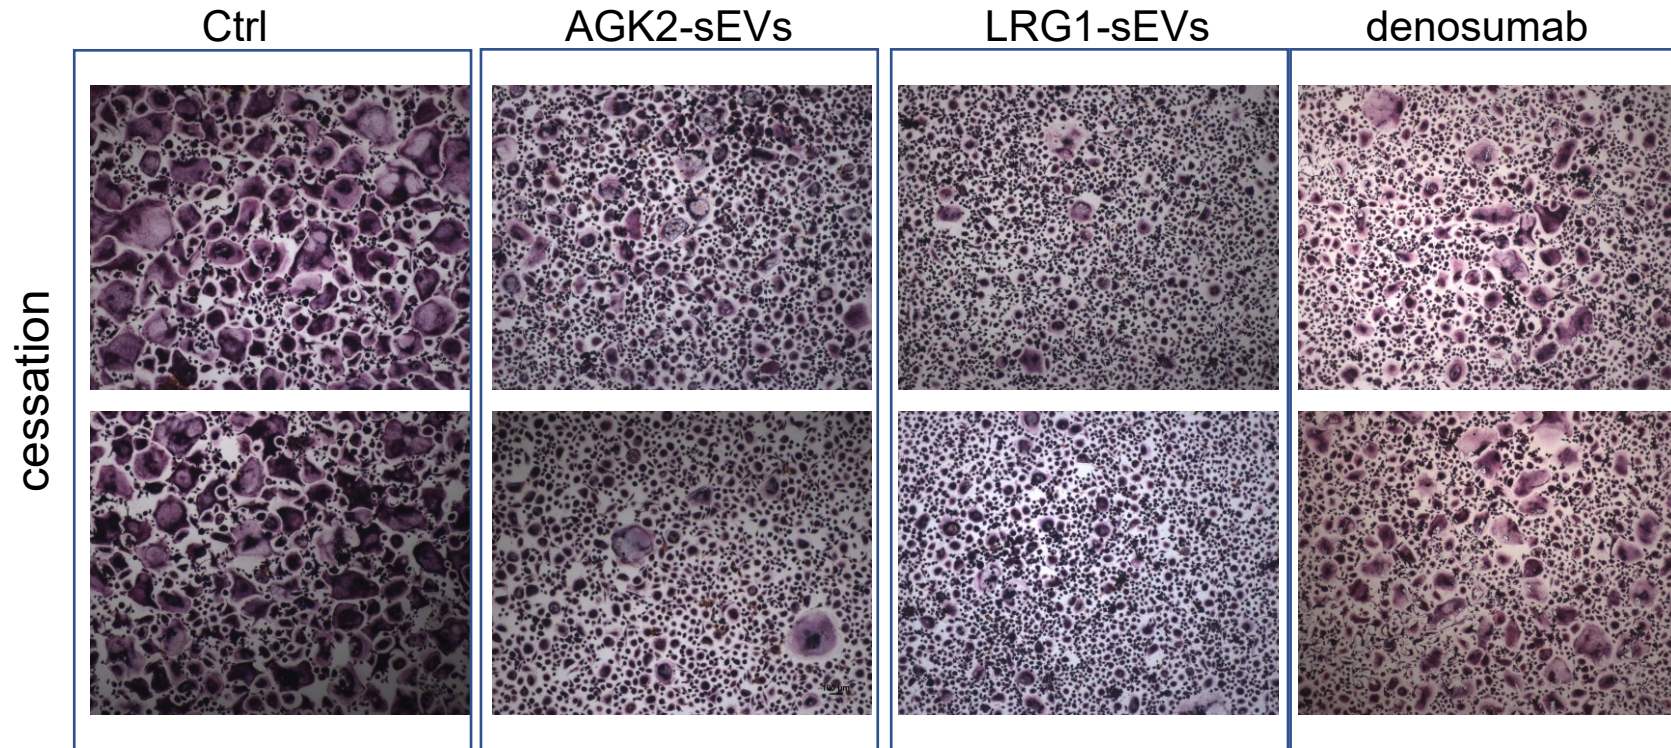

**Figure71**

IHC images of SIRT2 expression levels in human liver tissues

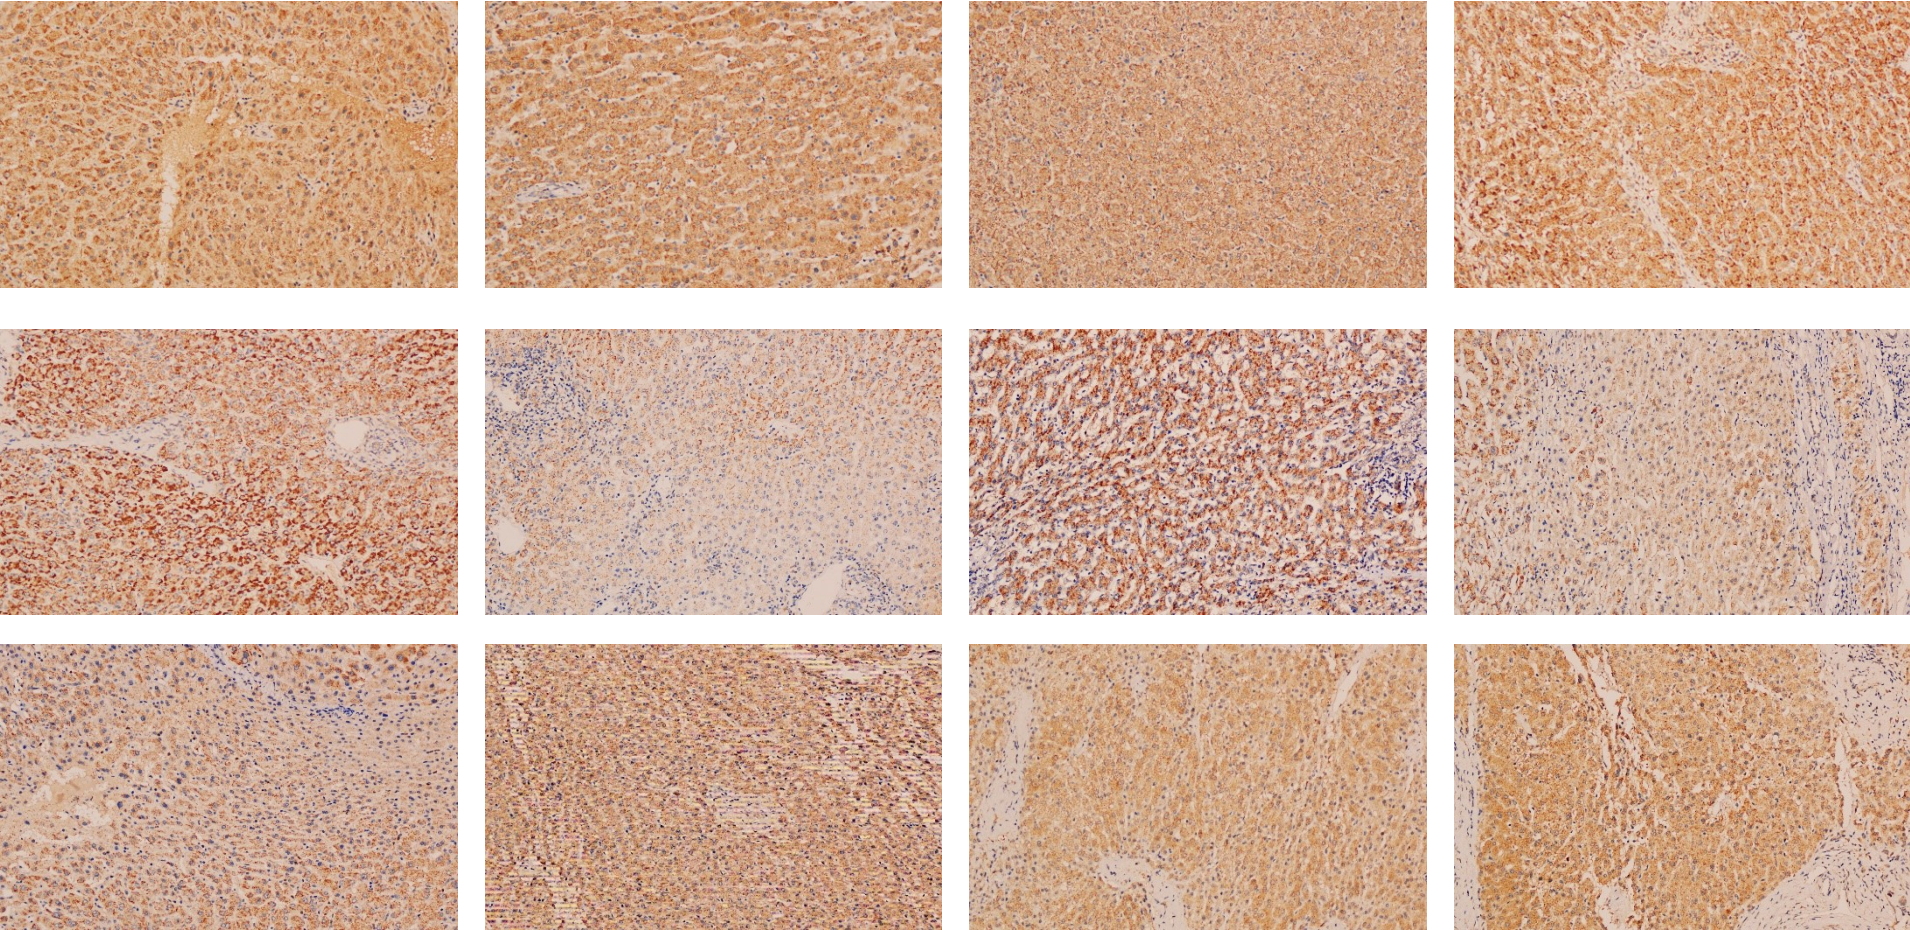

**Figure71**

IHC images of SIRT2 expression levels in human liver tissues

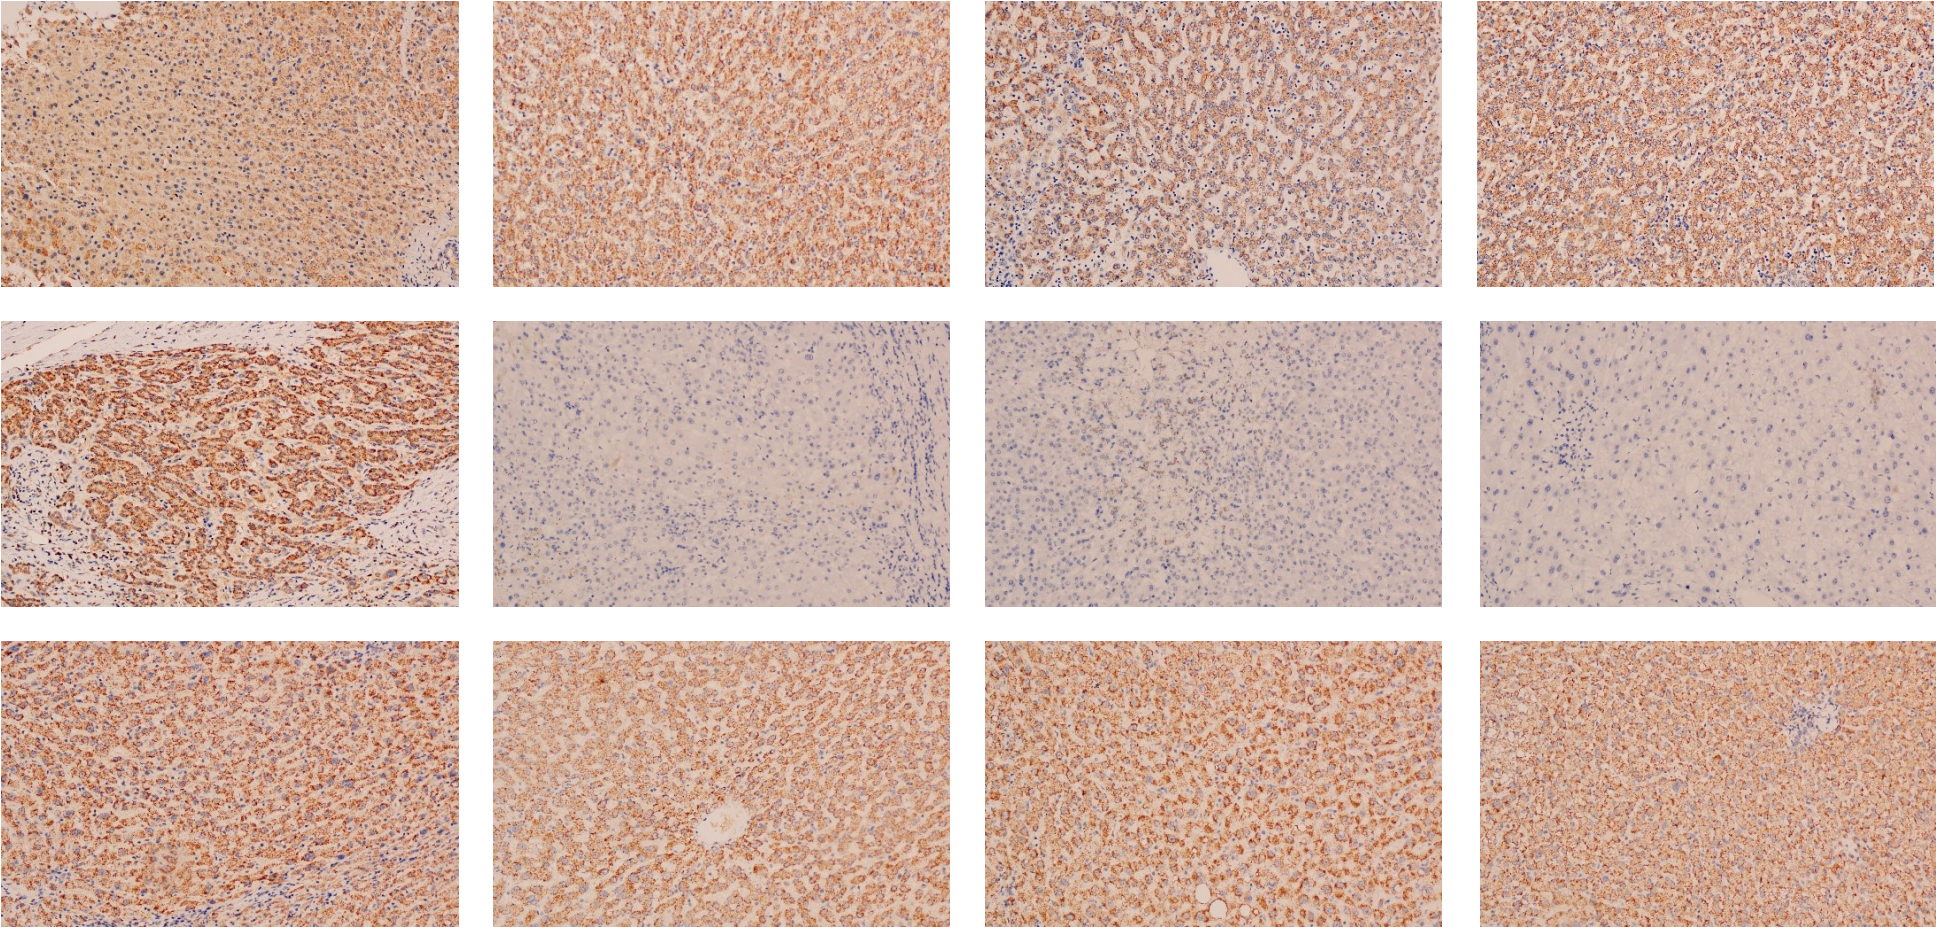

**Figure 71**

IHC images of SIRT2 expression levels in human liver tissues

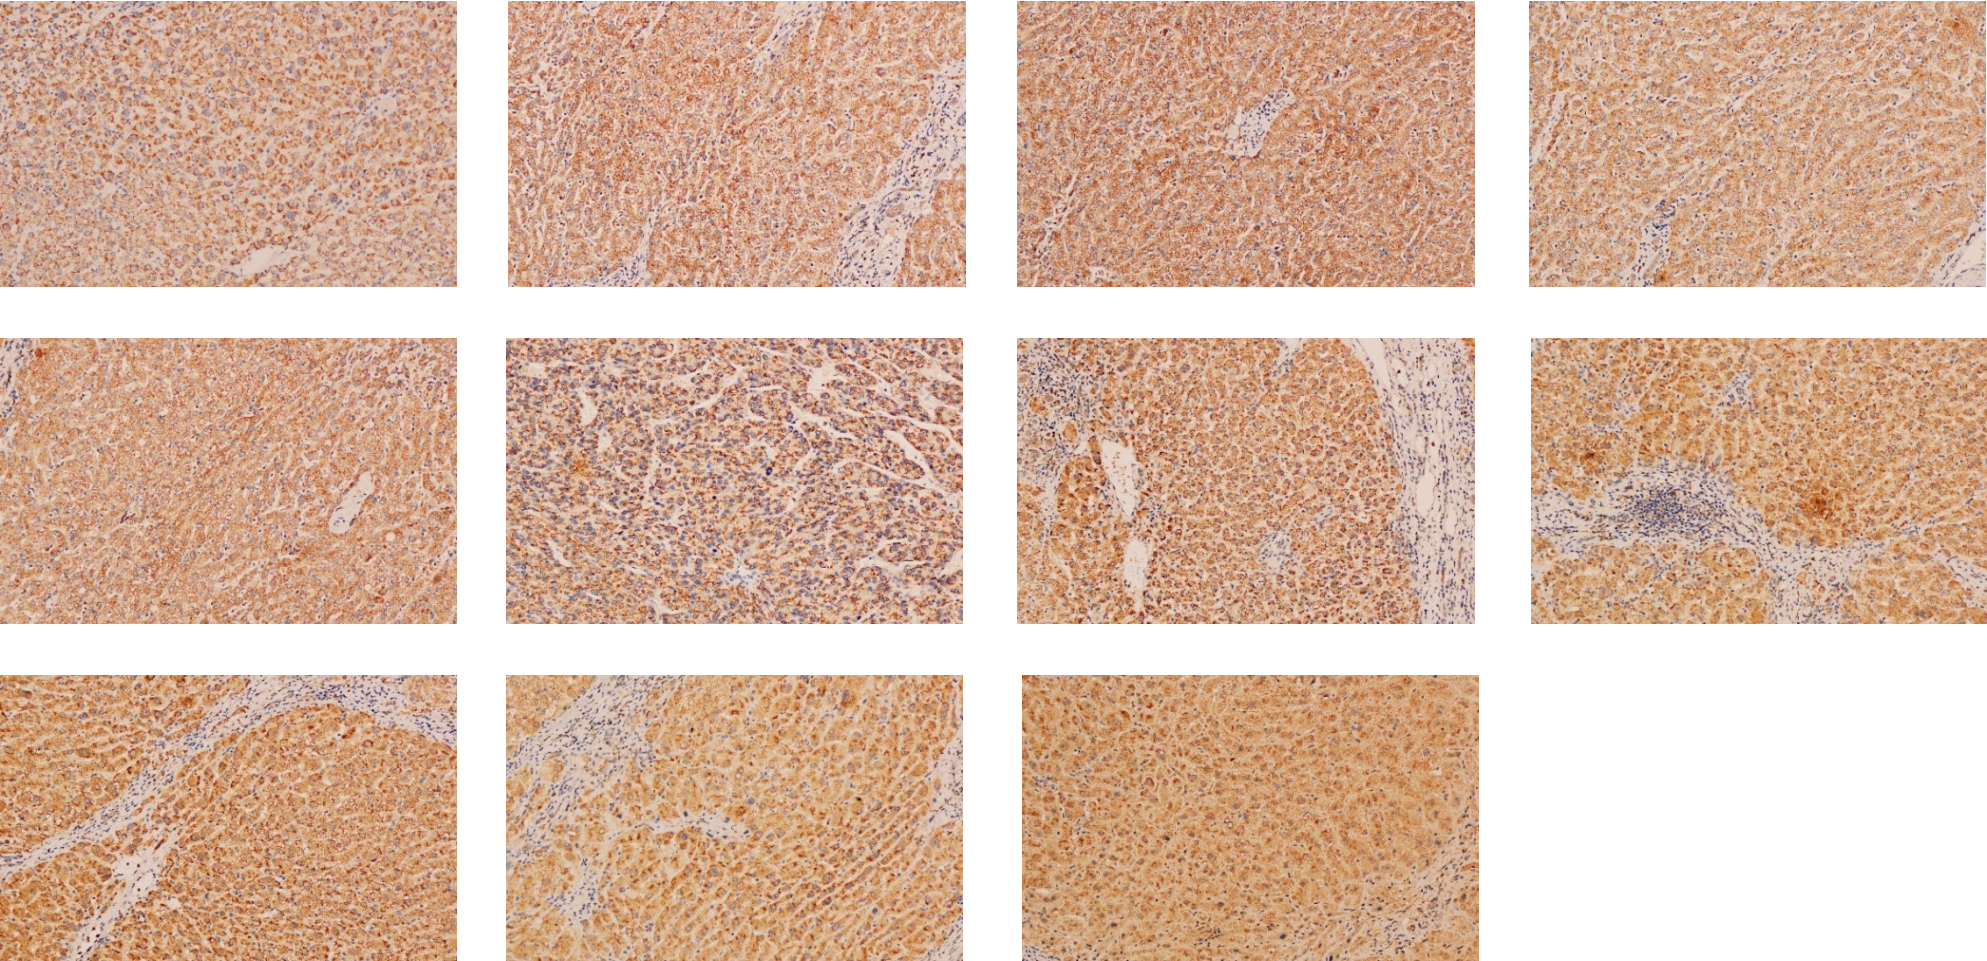

**Figure.7n**

western blot analysis of the protein expression of plasma-sEVs-LRG1 from patients

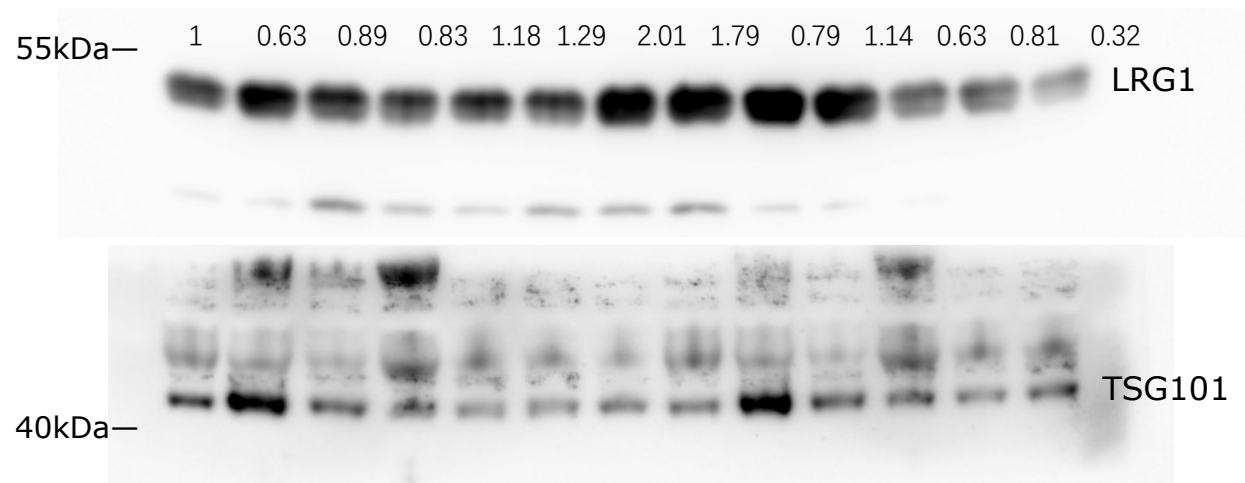



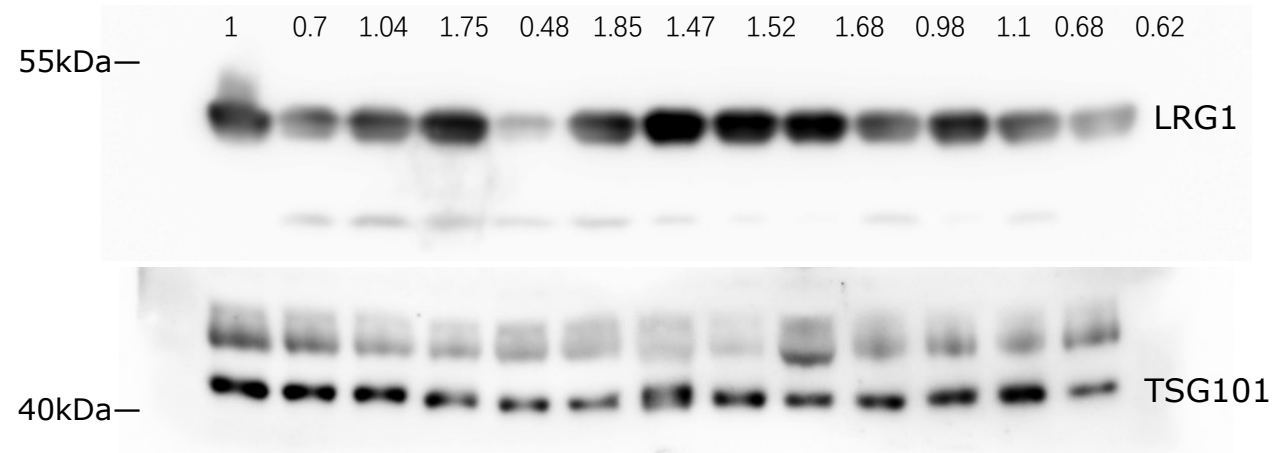

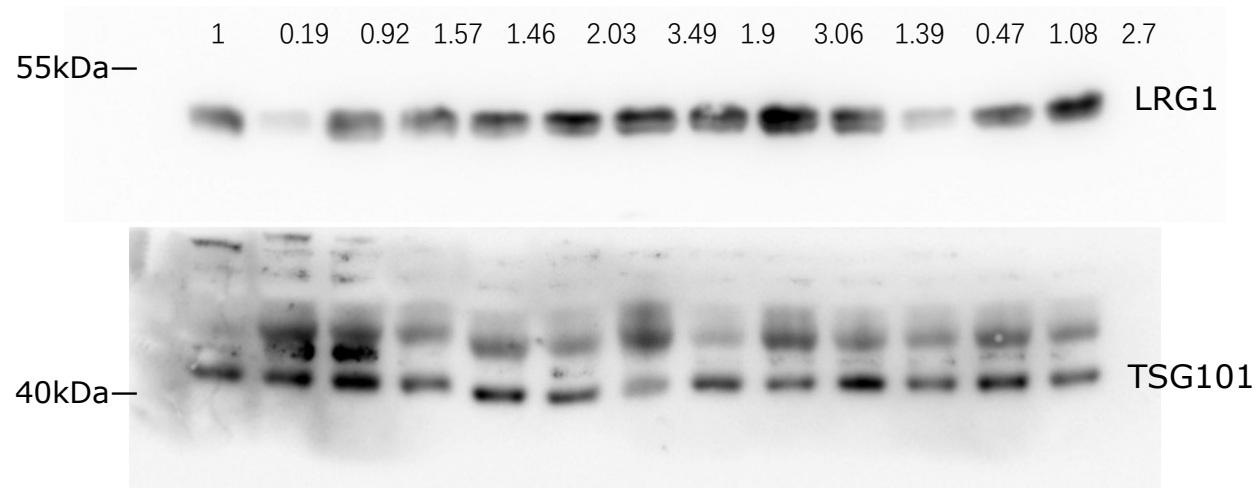

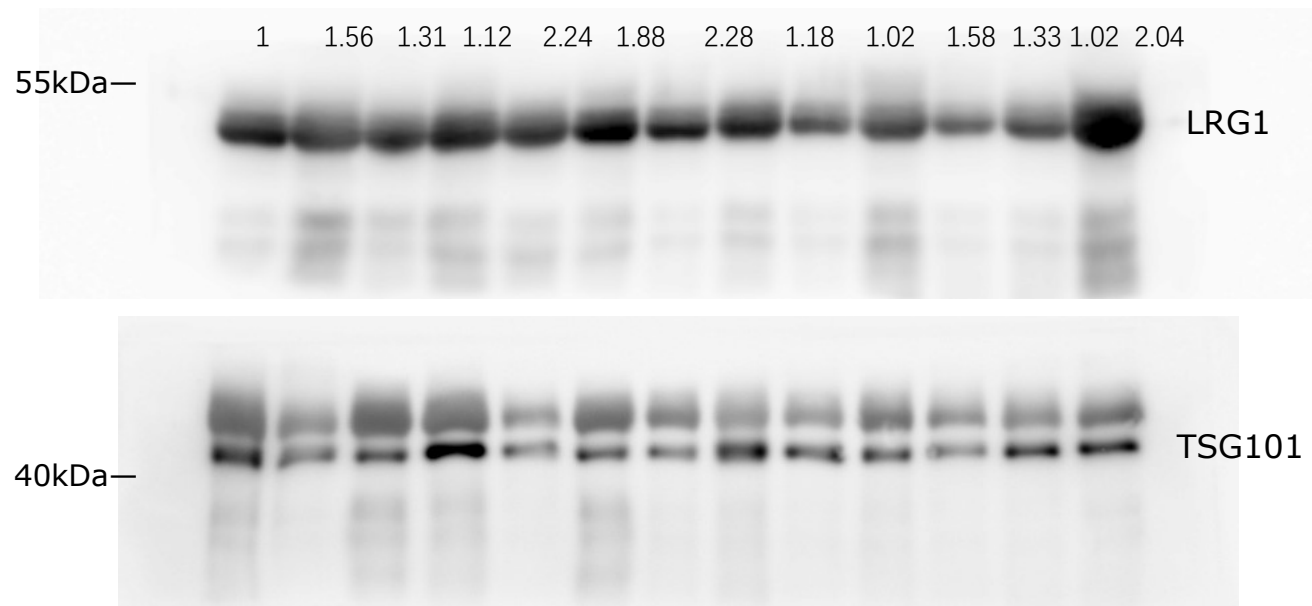

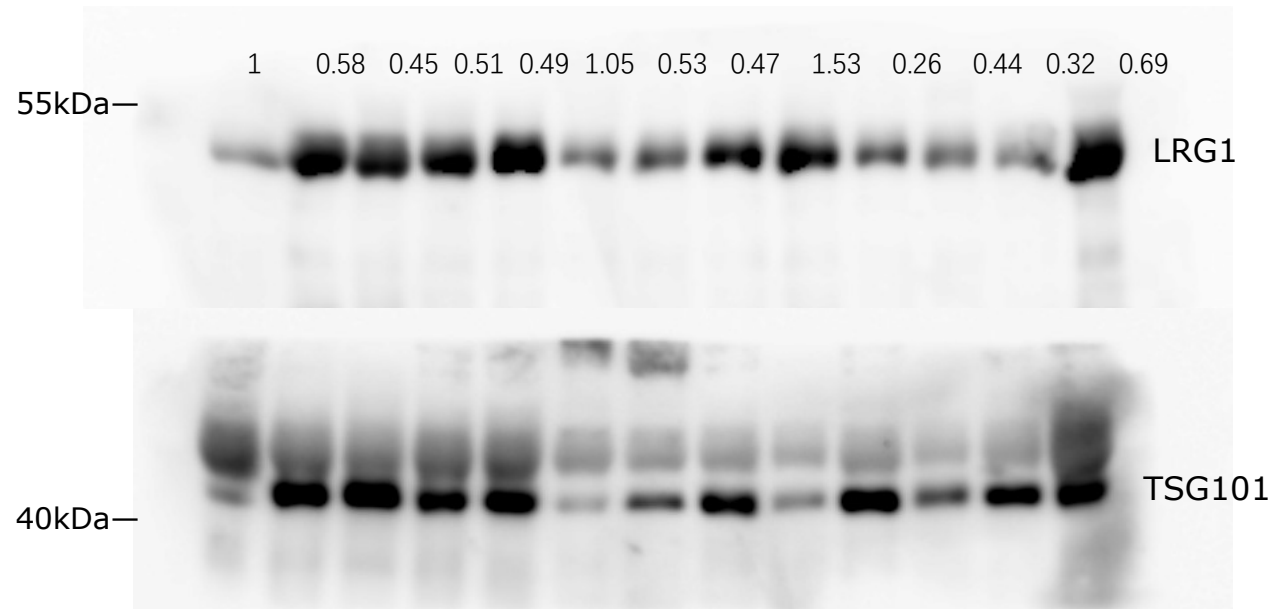

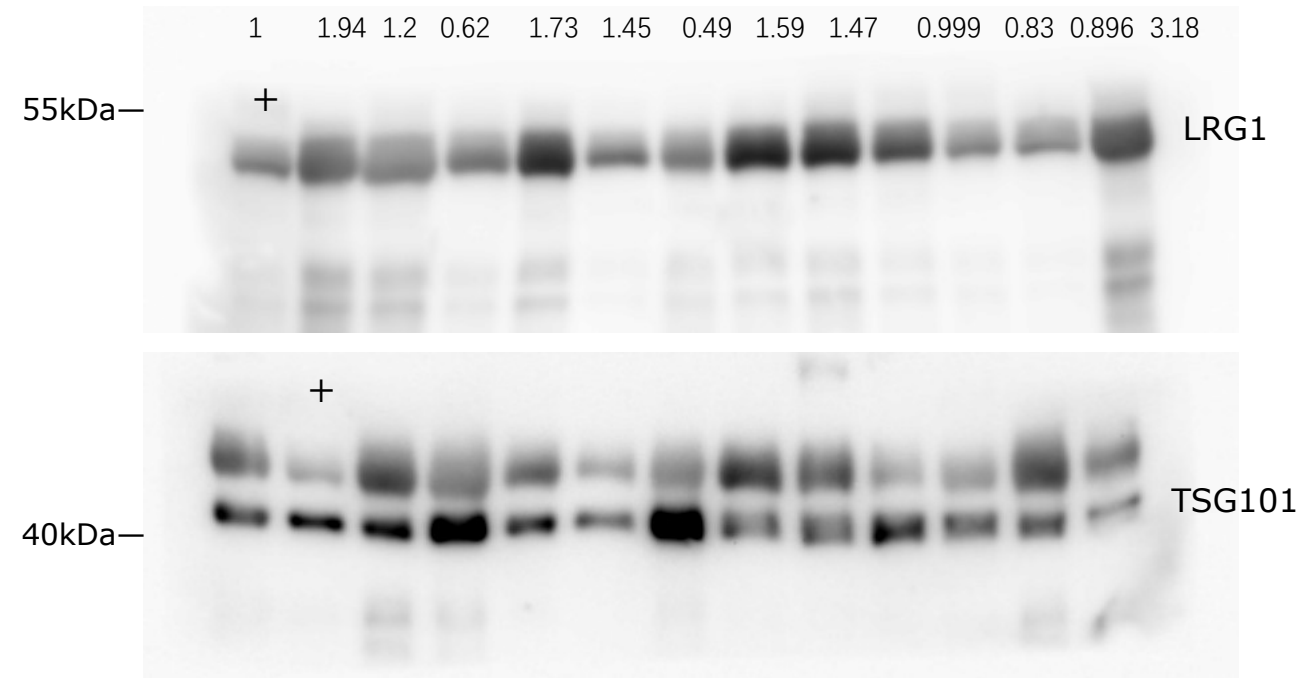

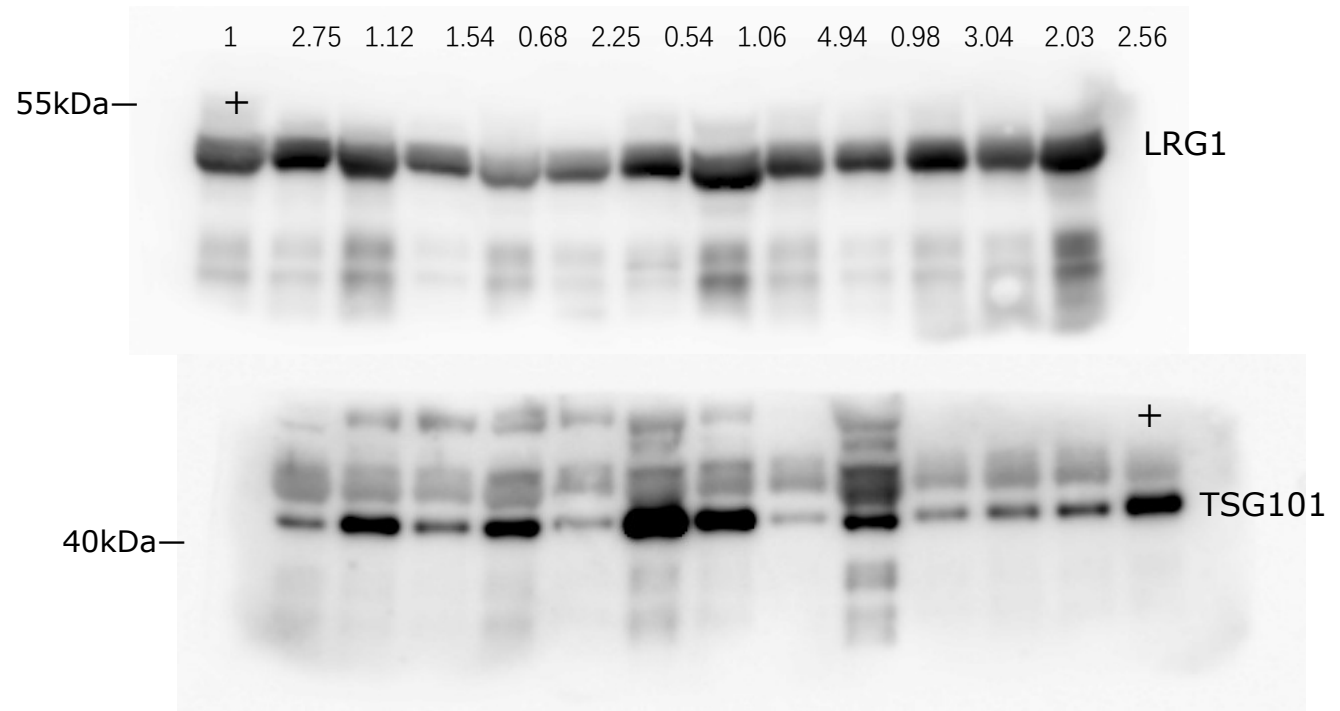

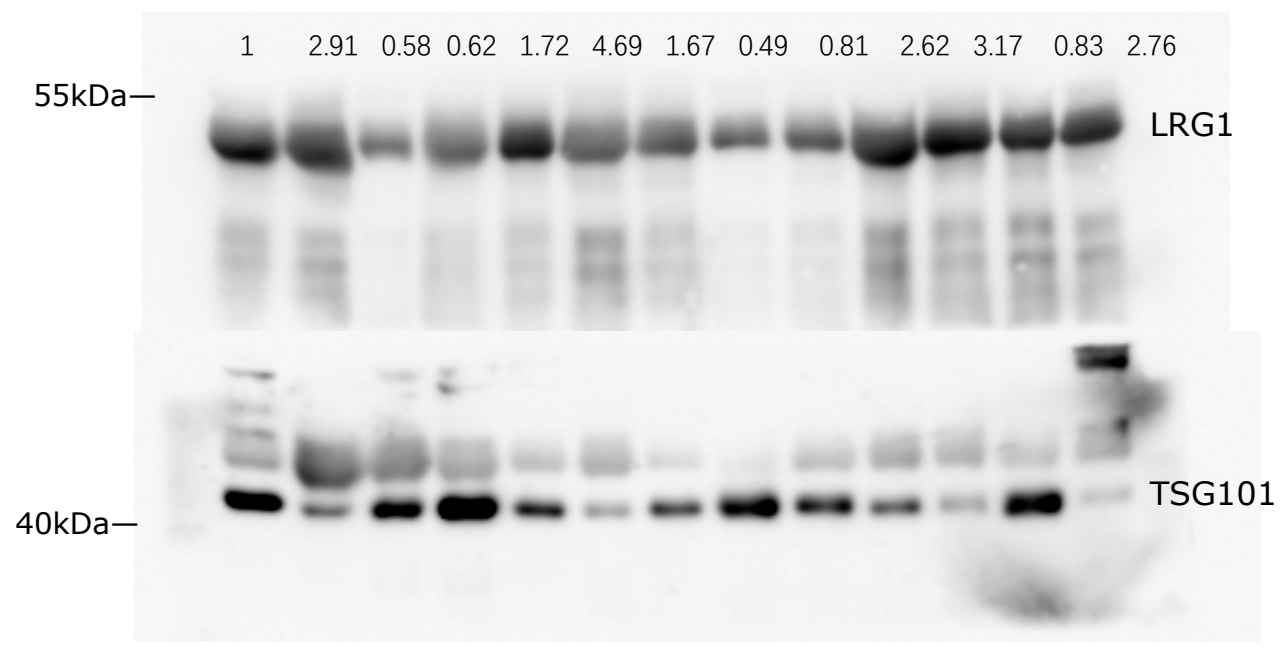

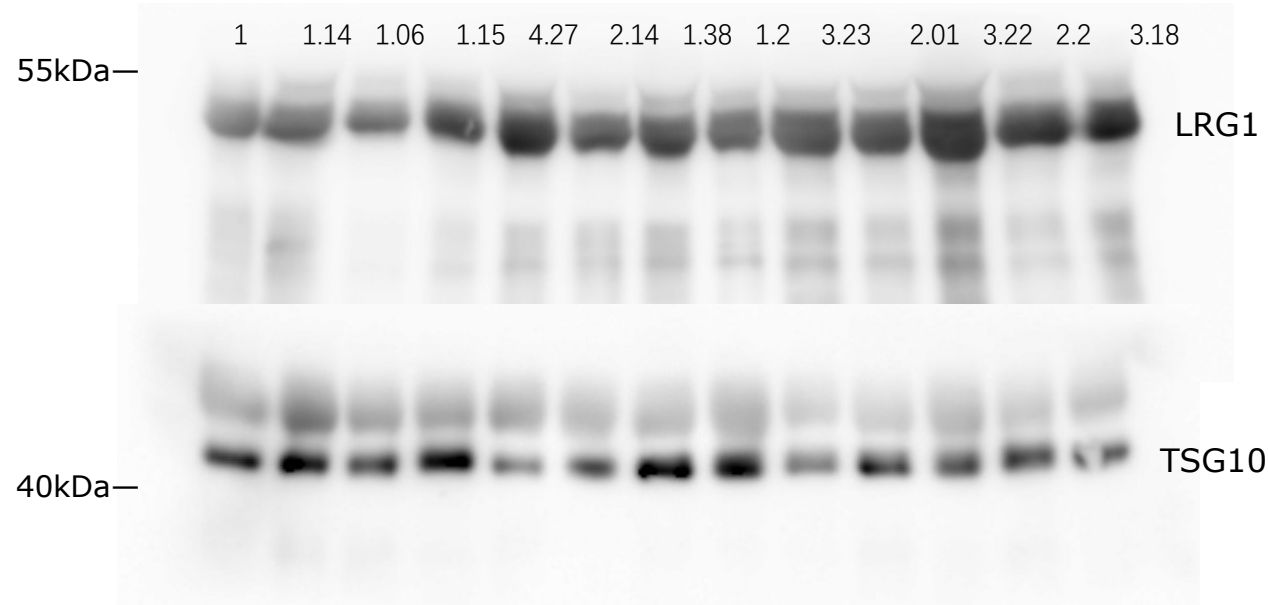



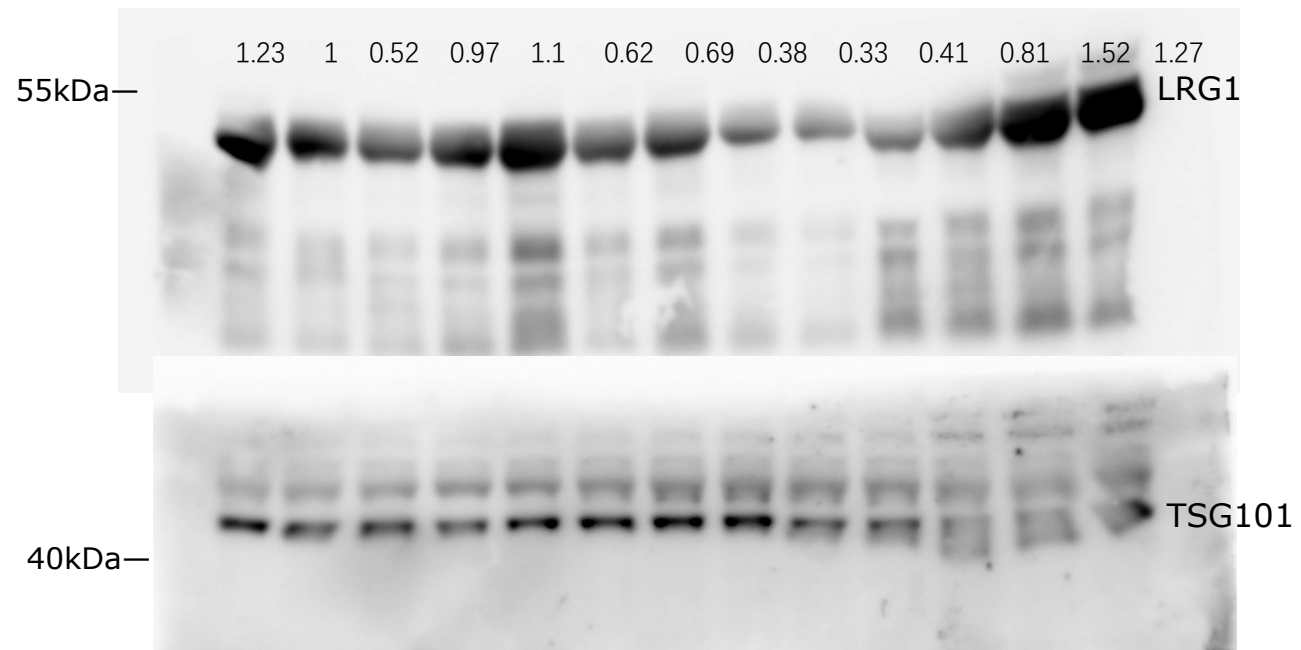

Extended Data Fig.1b

Young female mice

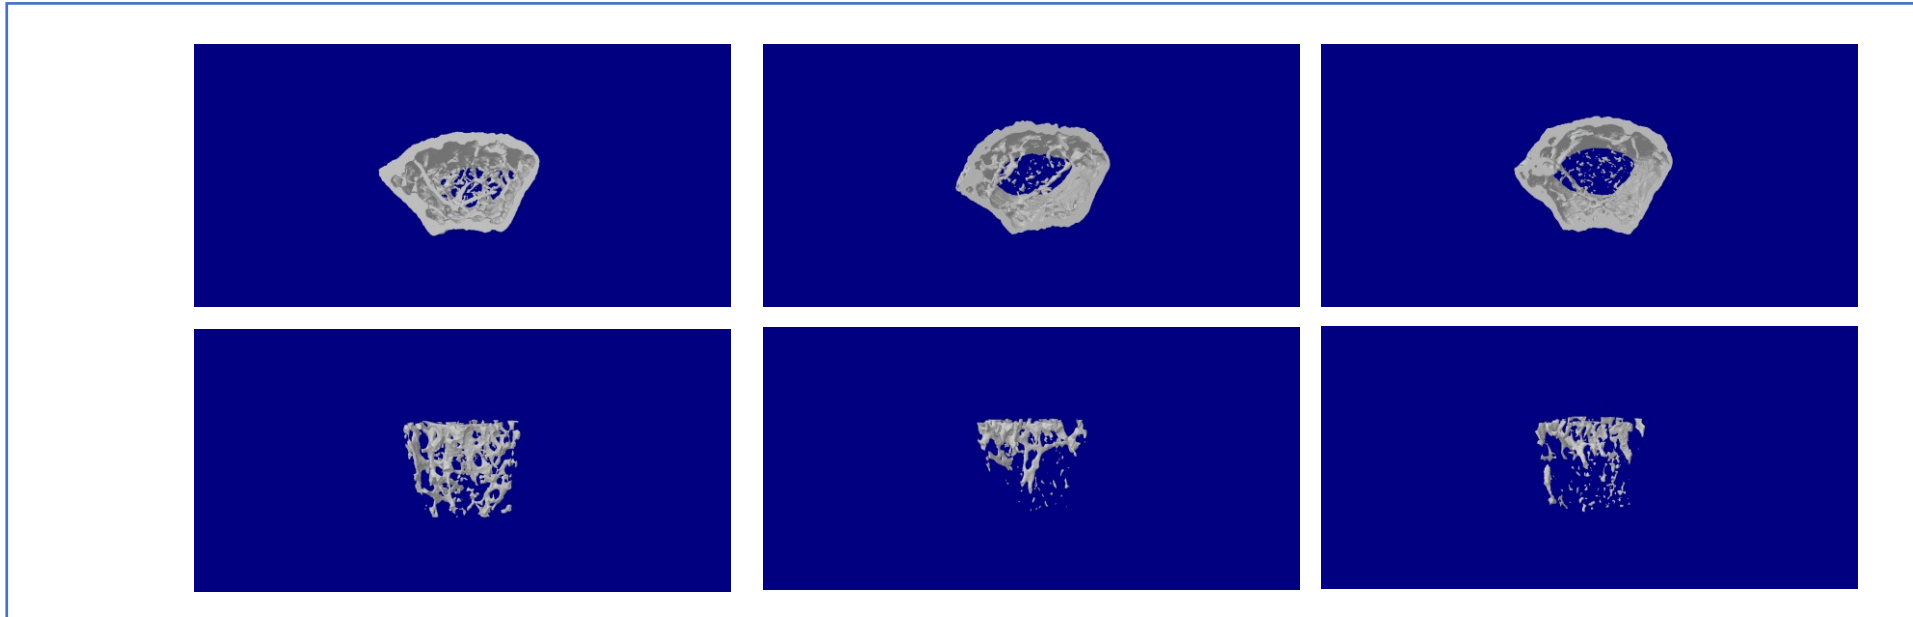

Loxp

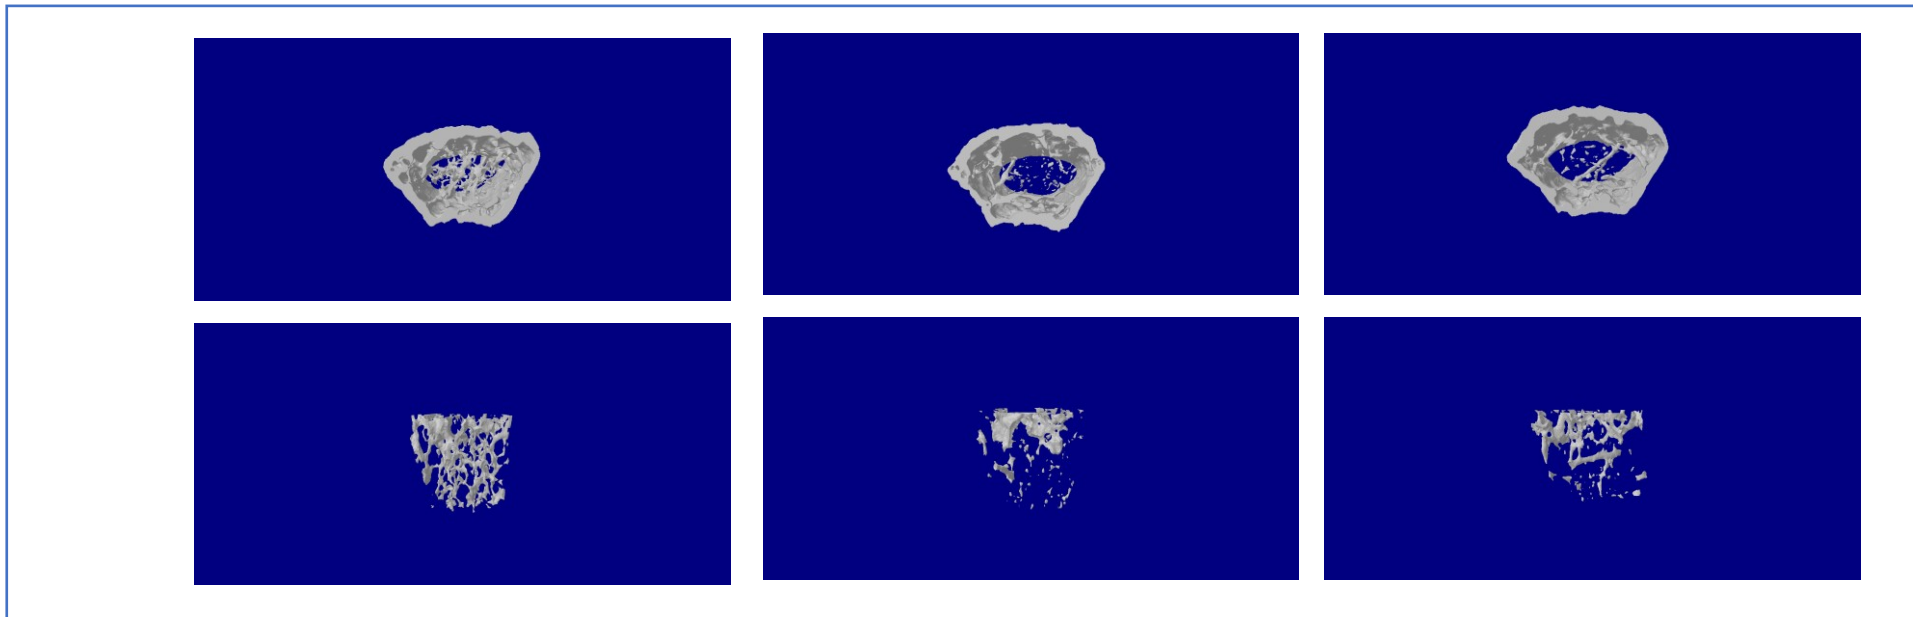

SIRT2-KO<sup>hep</sup>

Extended Data Fig.1e

Young male mice-Loxp

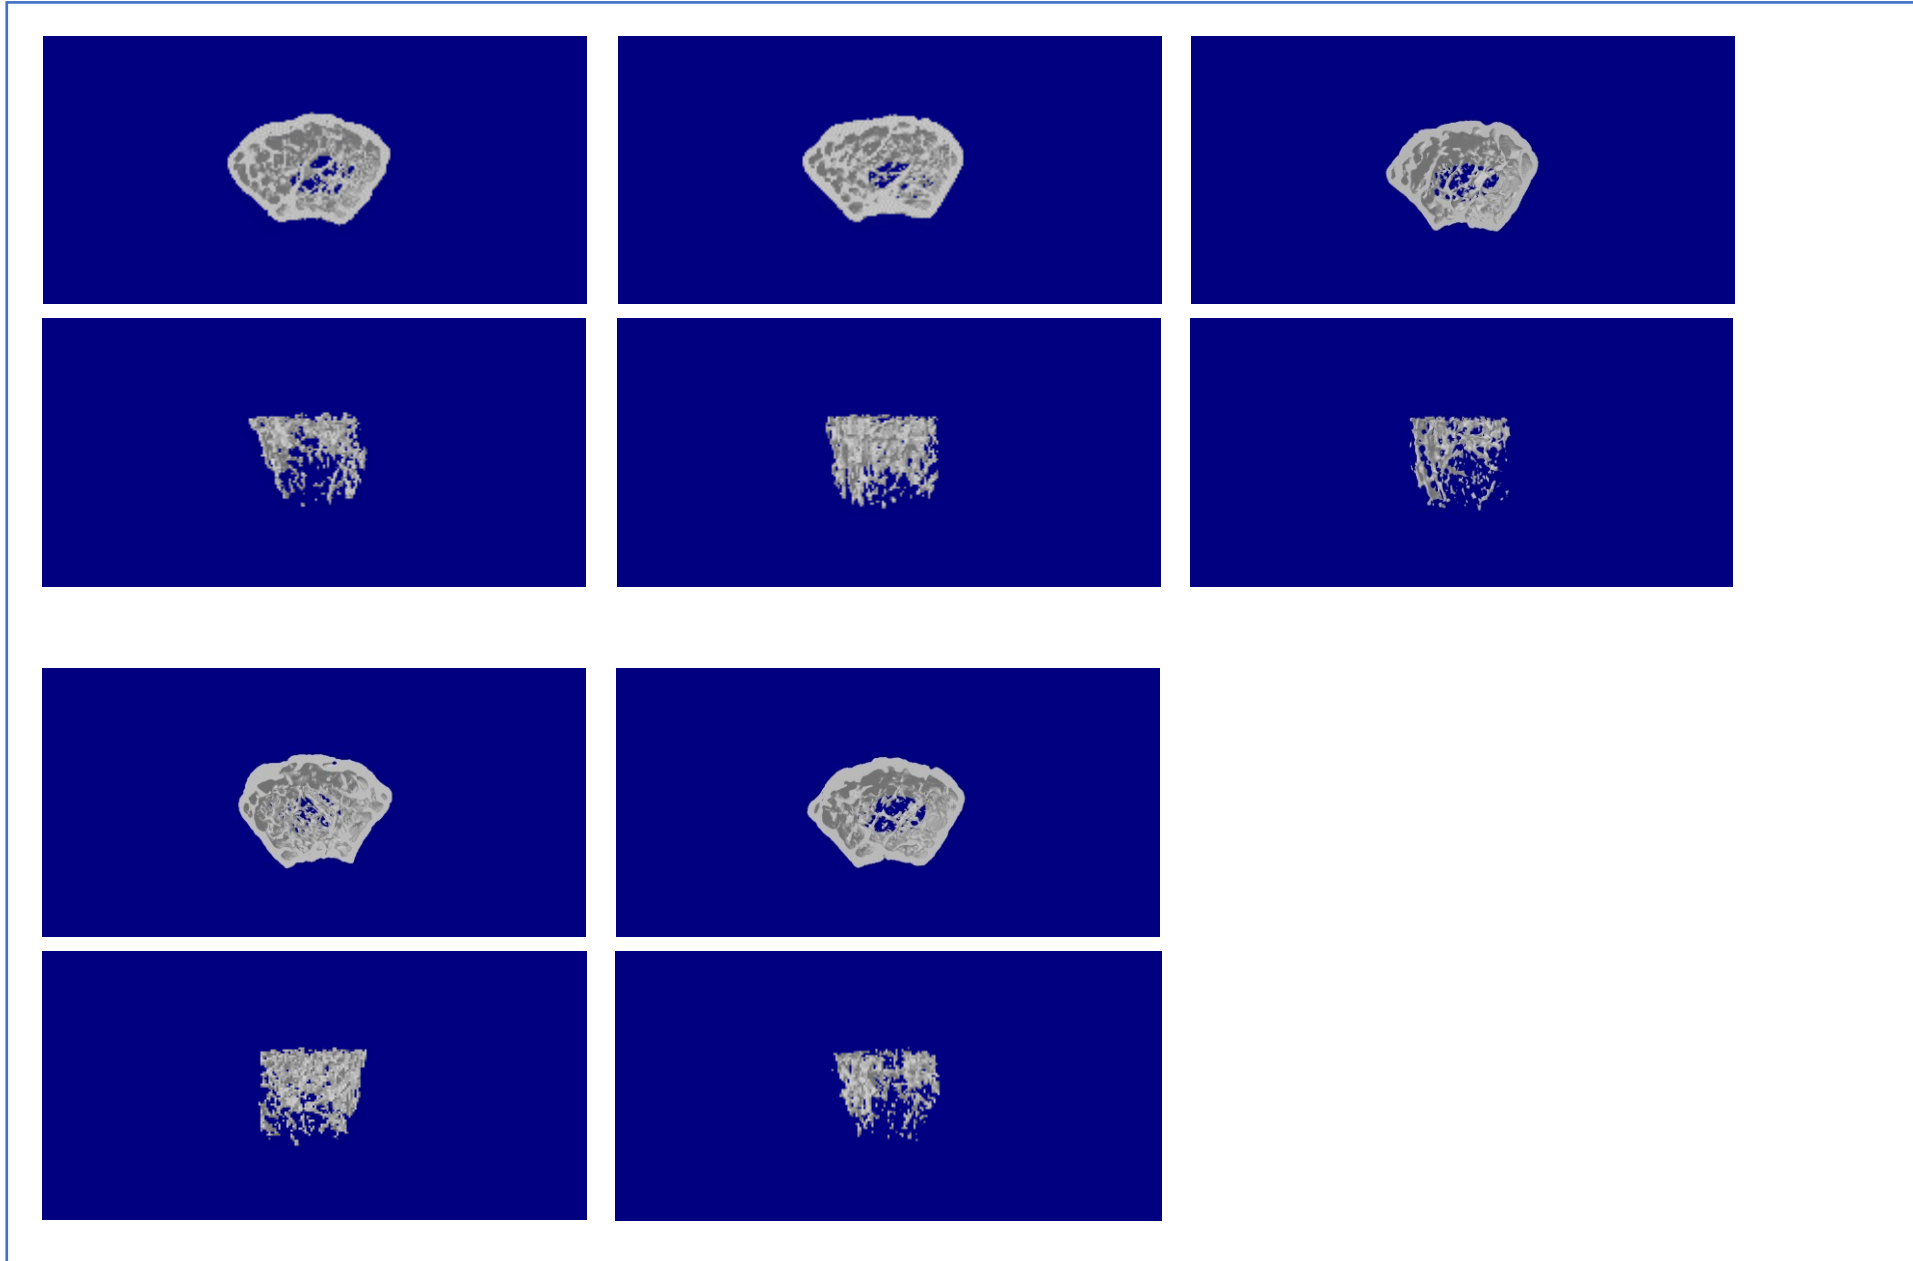

Extended Data Fig.1e

Young male mice-SIRT2-KO<sup>hep</sup>

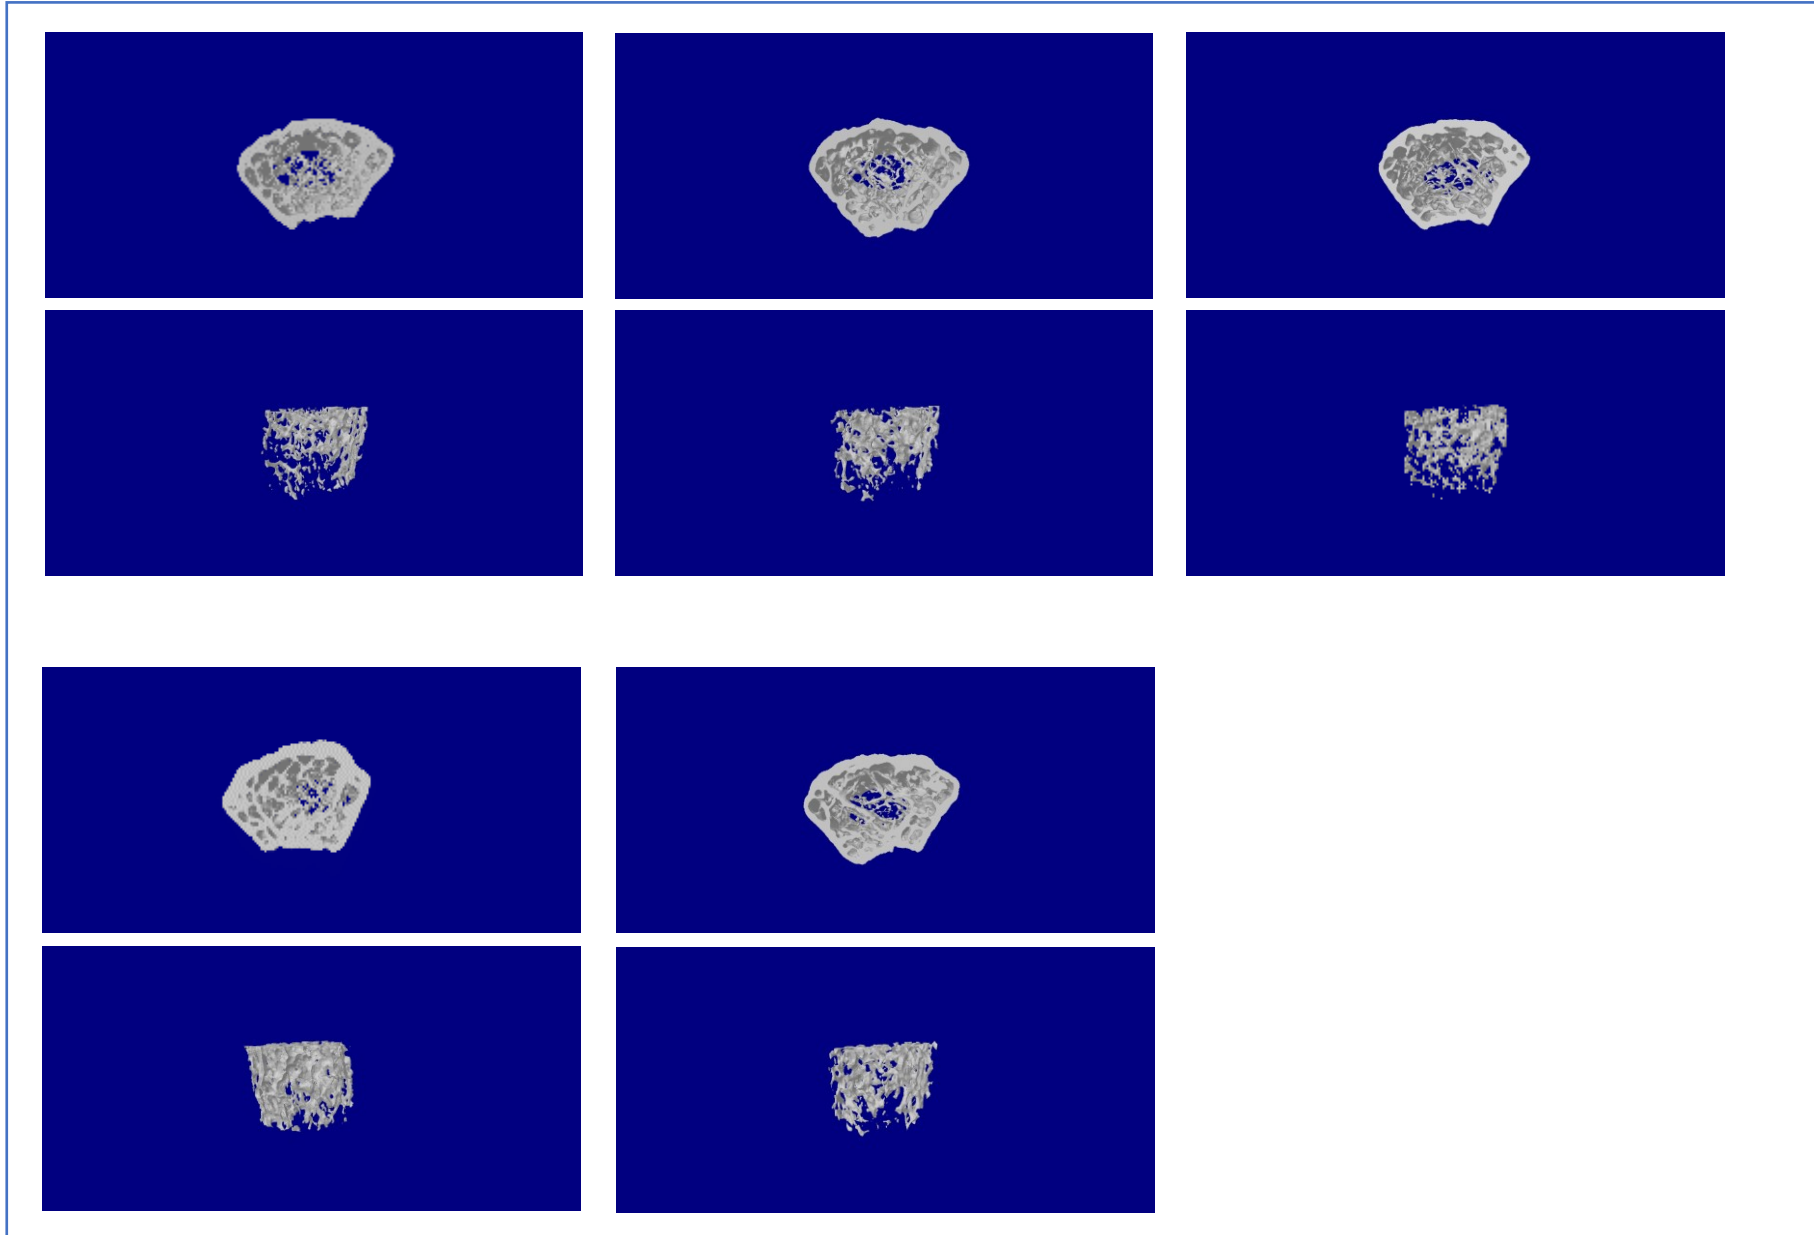

**Extended Data Fig.1i**

H&E staining on paraffin-embedded femur sections in aged mice

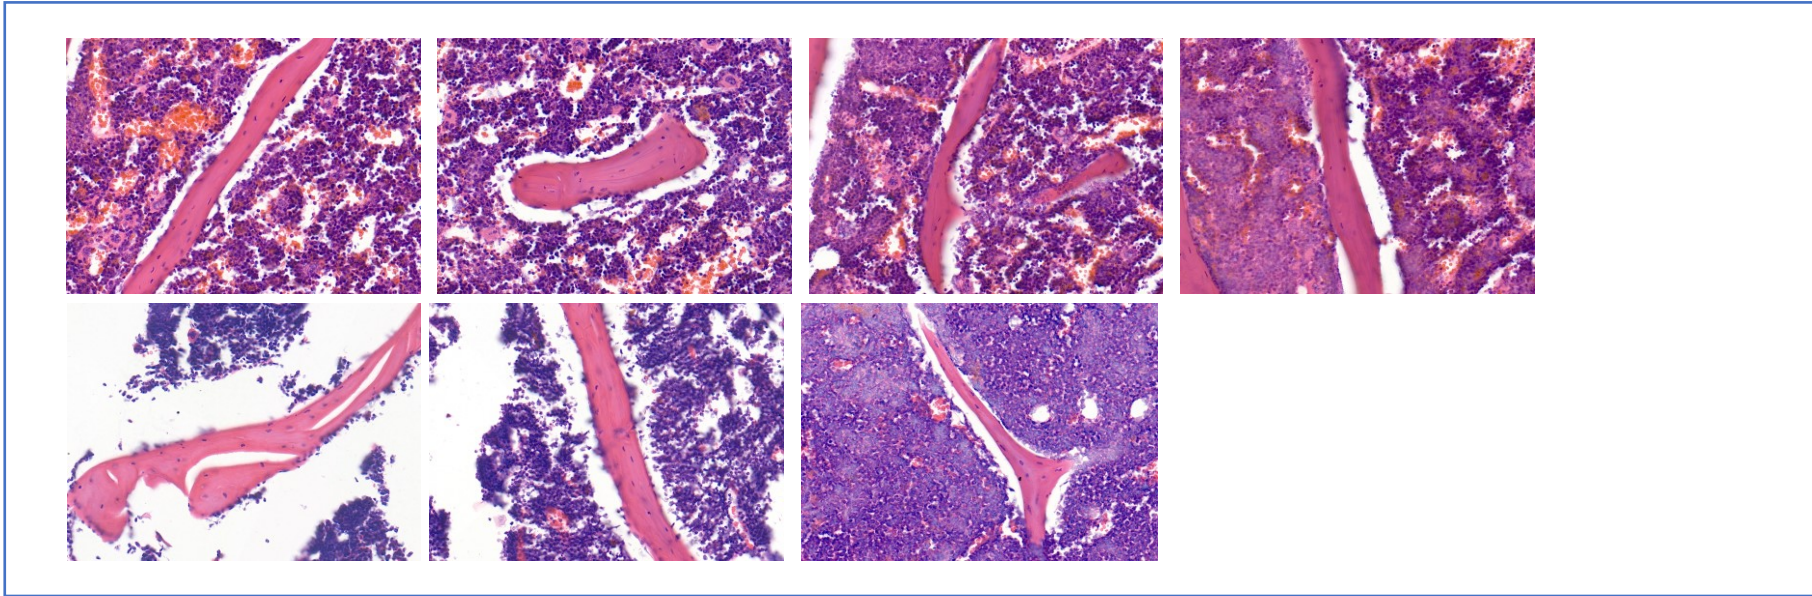

aged female mice  
-Loxp

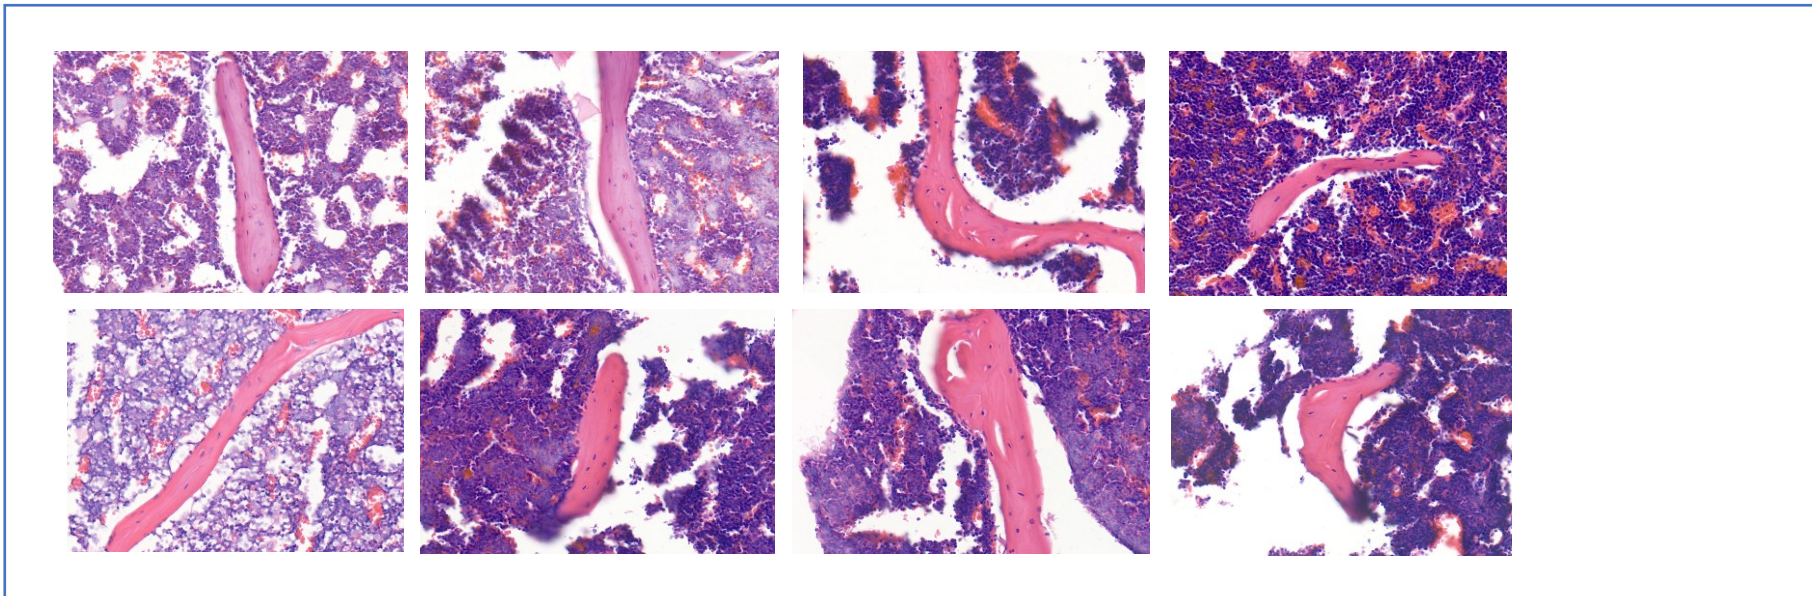

Aged female mice  
-SIRT2-KO<sup>hep</sup>

**Extended Data Fig.1m**

H&E staining on paraffin-embedded femur sections in aged mice

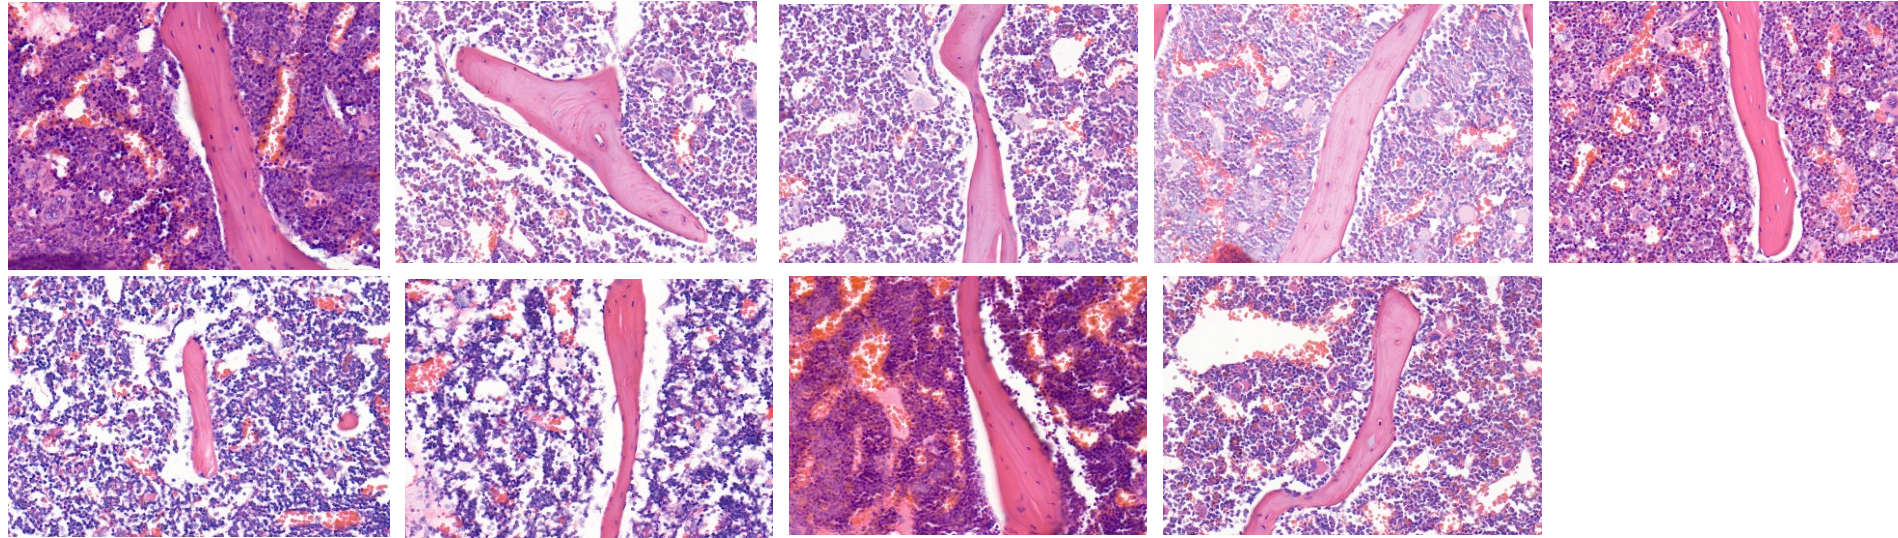

aged male mice  
-Loxp

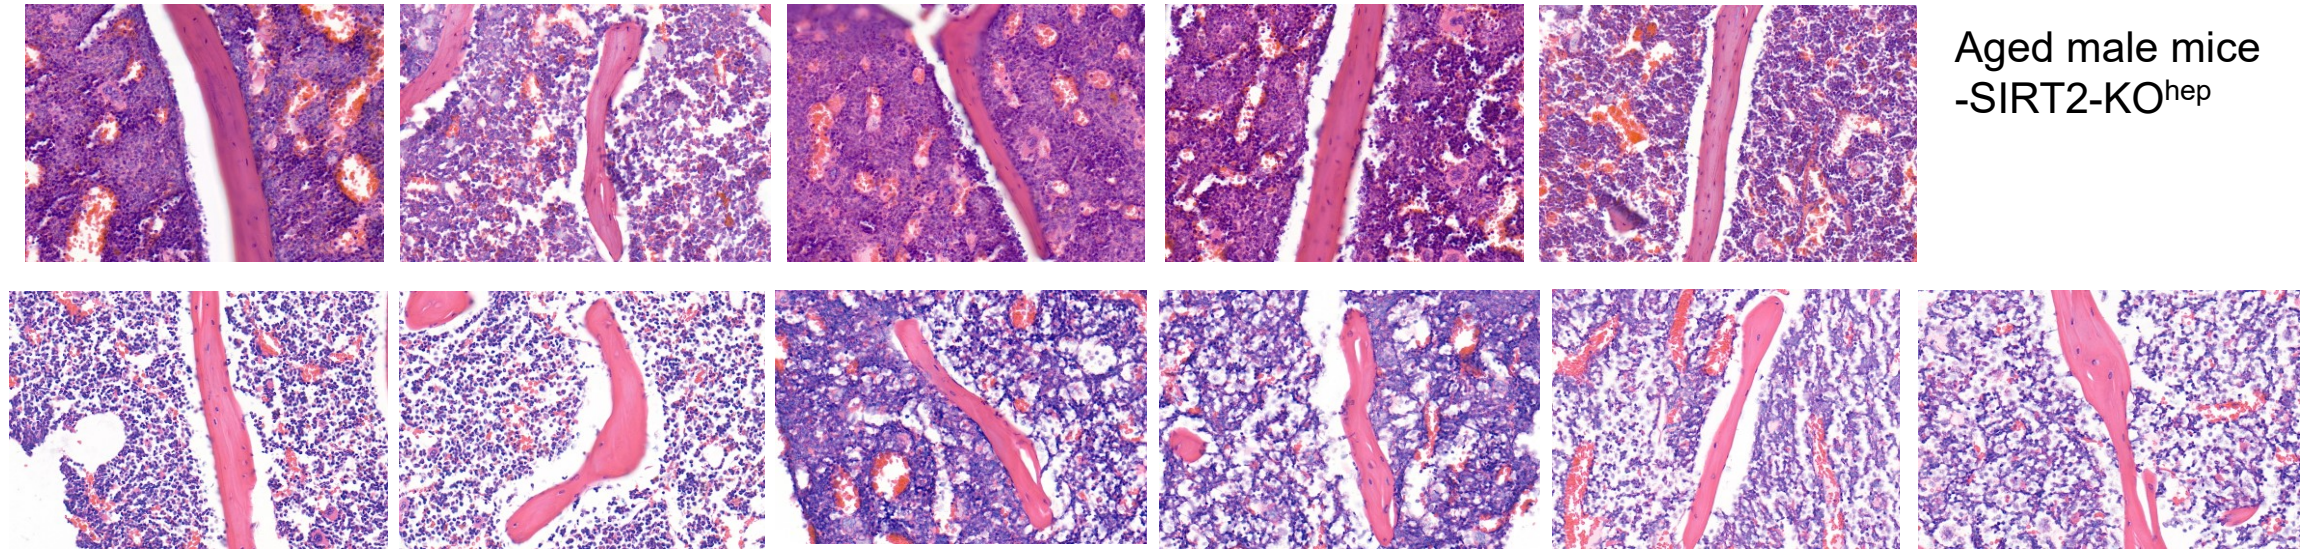

Aged male mice  
-SIRT2-KO<sup>hep</sup>

**Extended data fig.2a**

ALP and ARS staining after osteogenesis from BM-MSCs treated with plasma

PBS      Loxp-plasma      SIRT2-KO<sup>hep</sup>-plasma

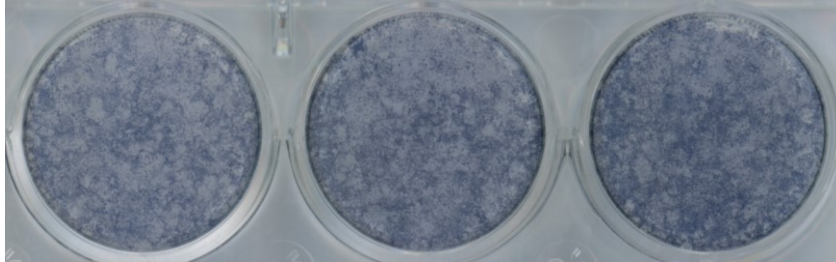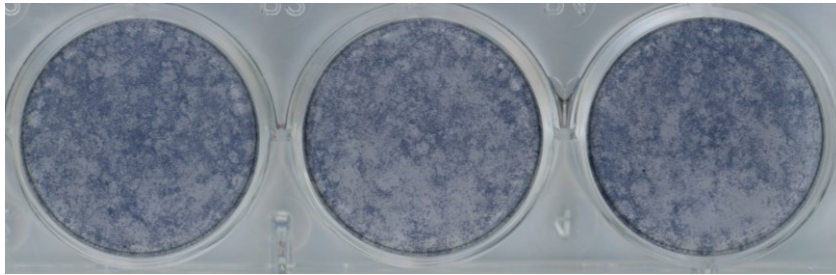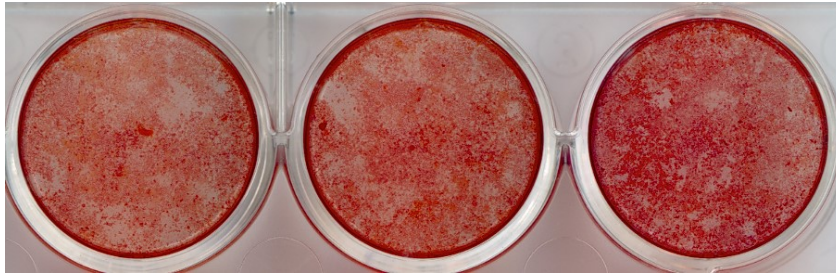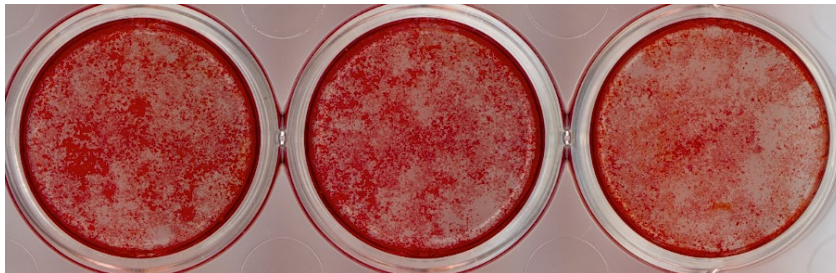

**Extended data Fig.4a**

TRAP staining images of osteoclasts treated with the sEVs derived from AML12 hepatocytes

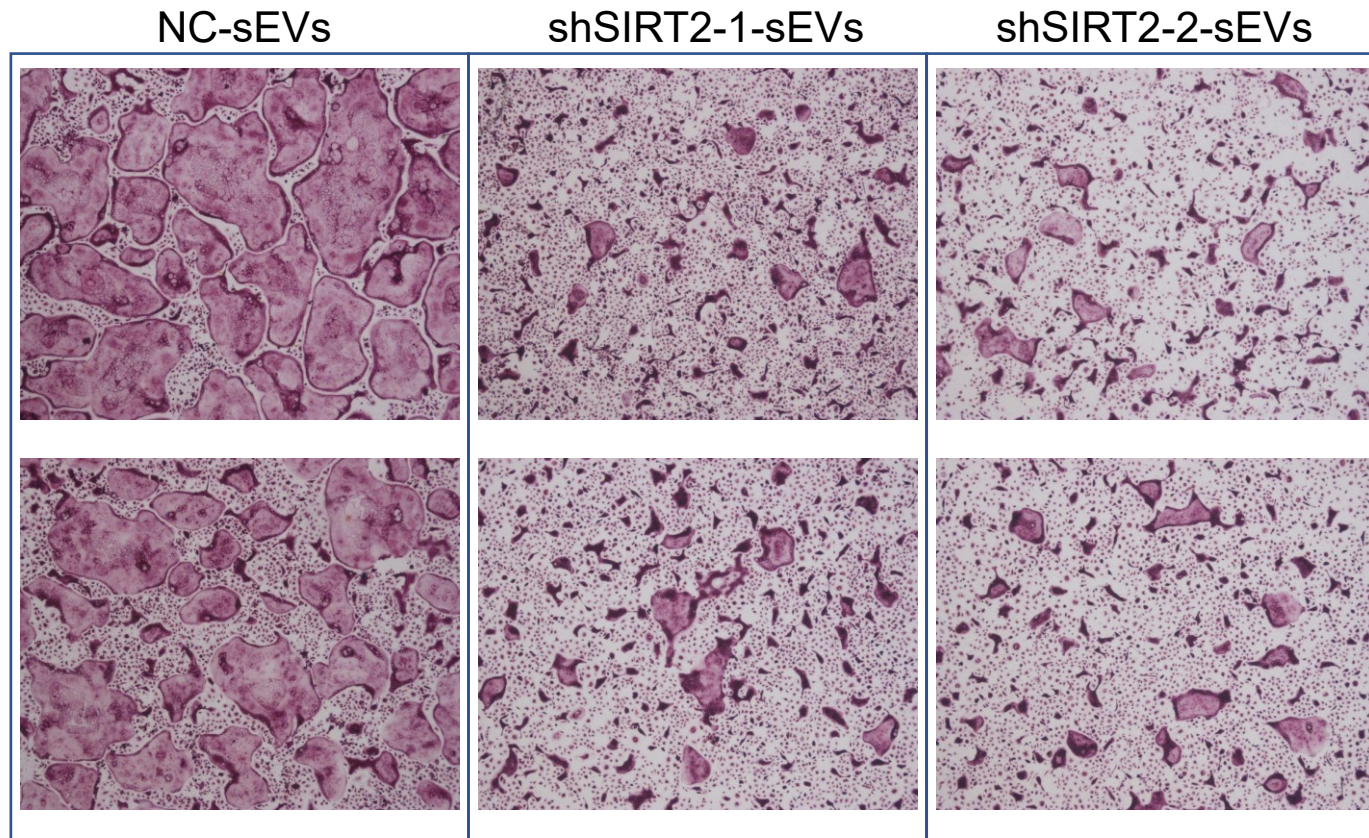



**Extended Data Fig.6a**

TRAP staining on paraffin-embedded femur sections in young mice

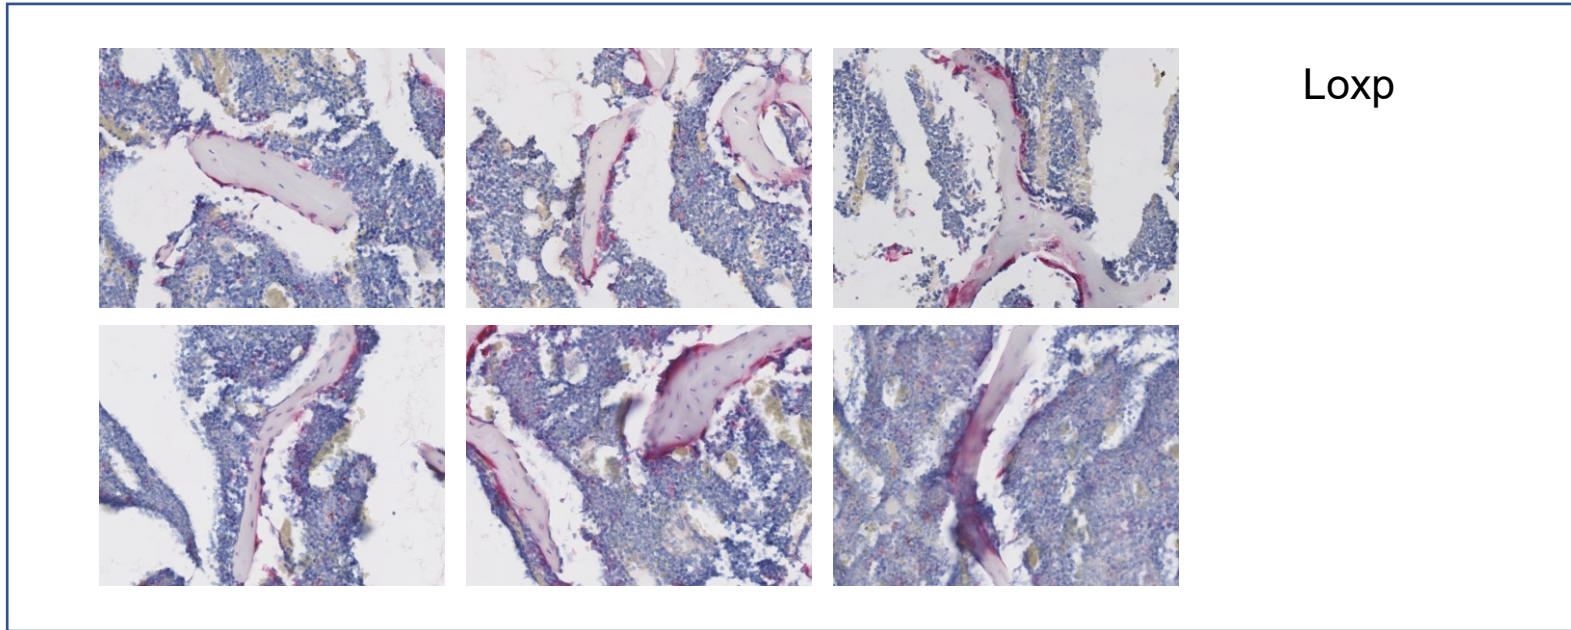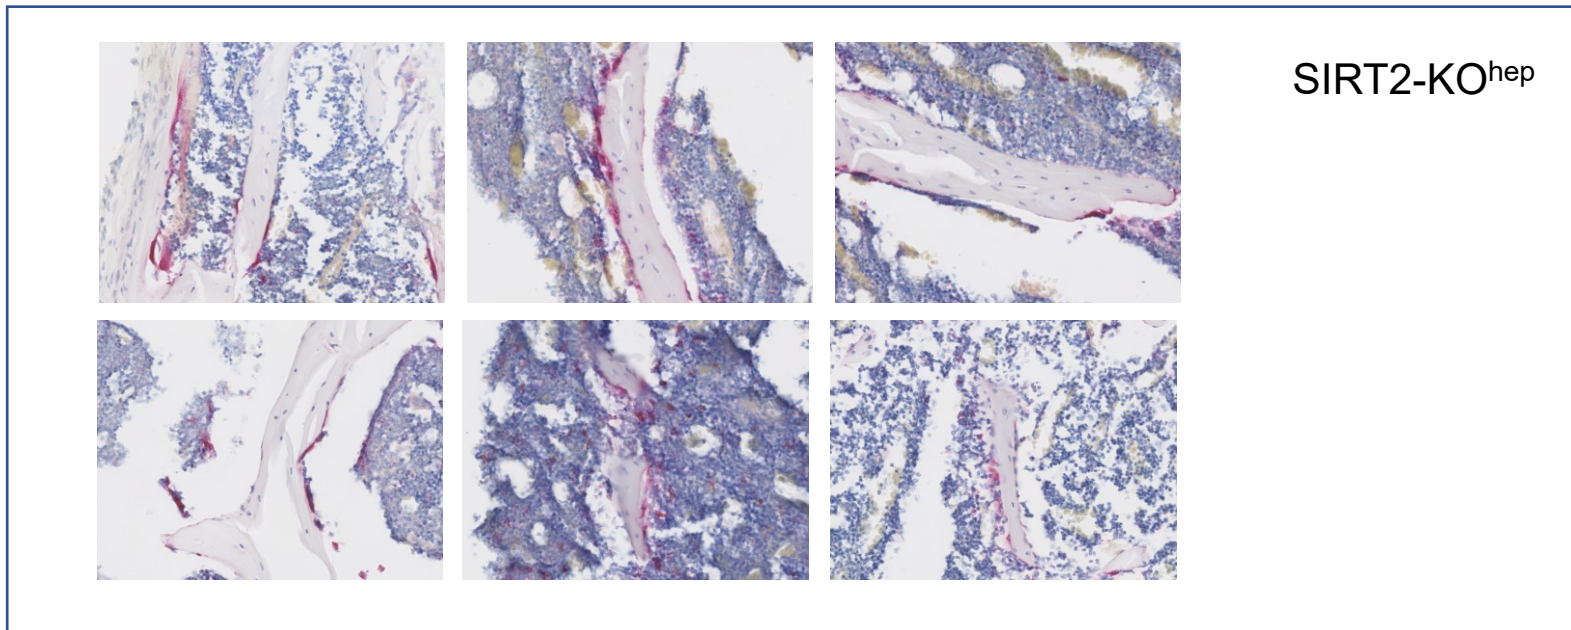

**Extended Data Fig.6c**

immunofluorescence images of murine femurs in young mice

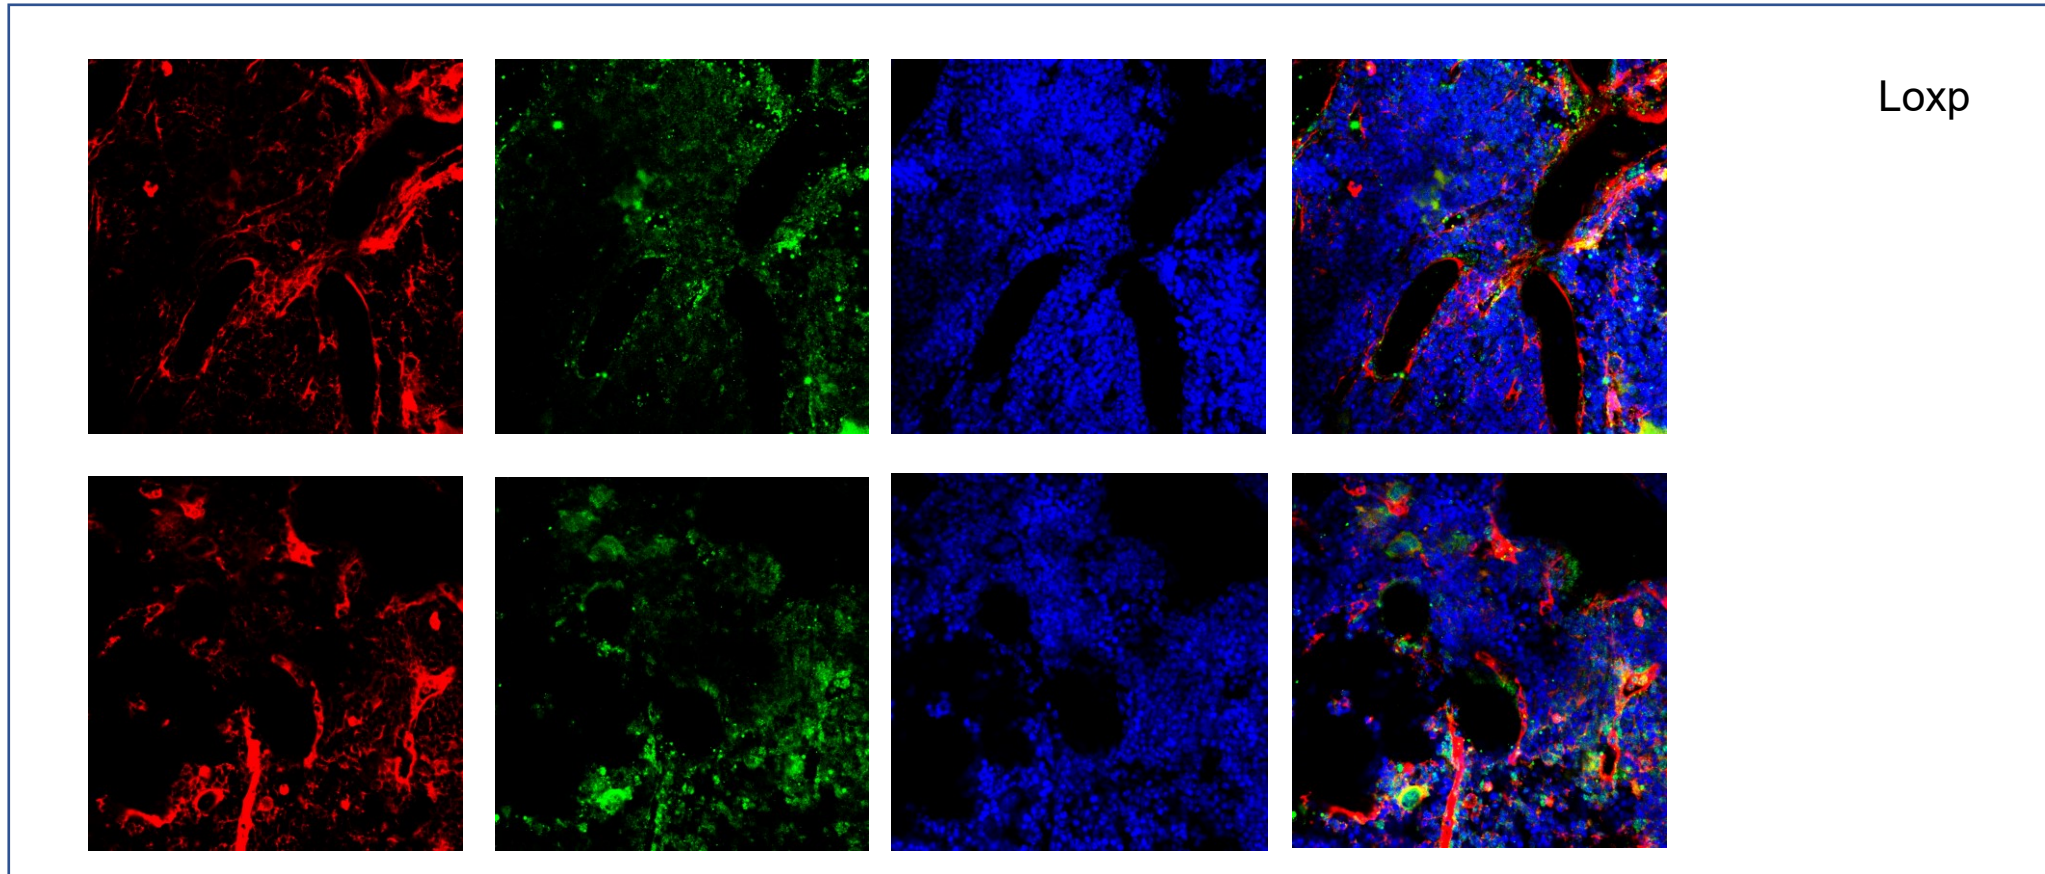

**Extended Data Fig.6c**

immunofluorescence images of murine femurs in young mice

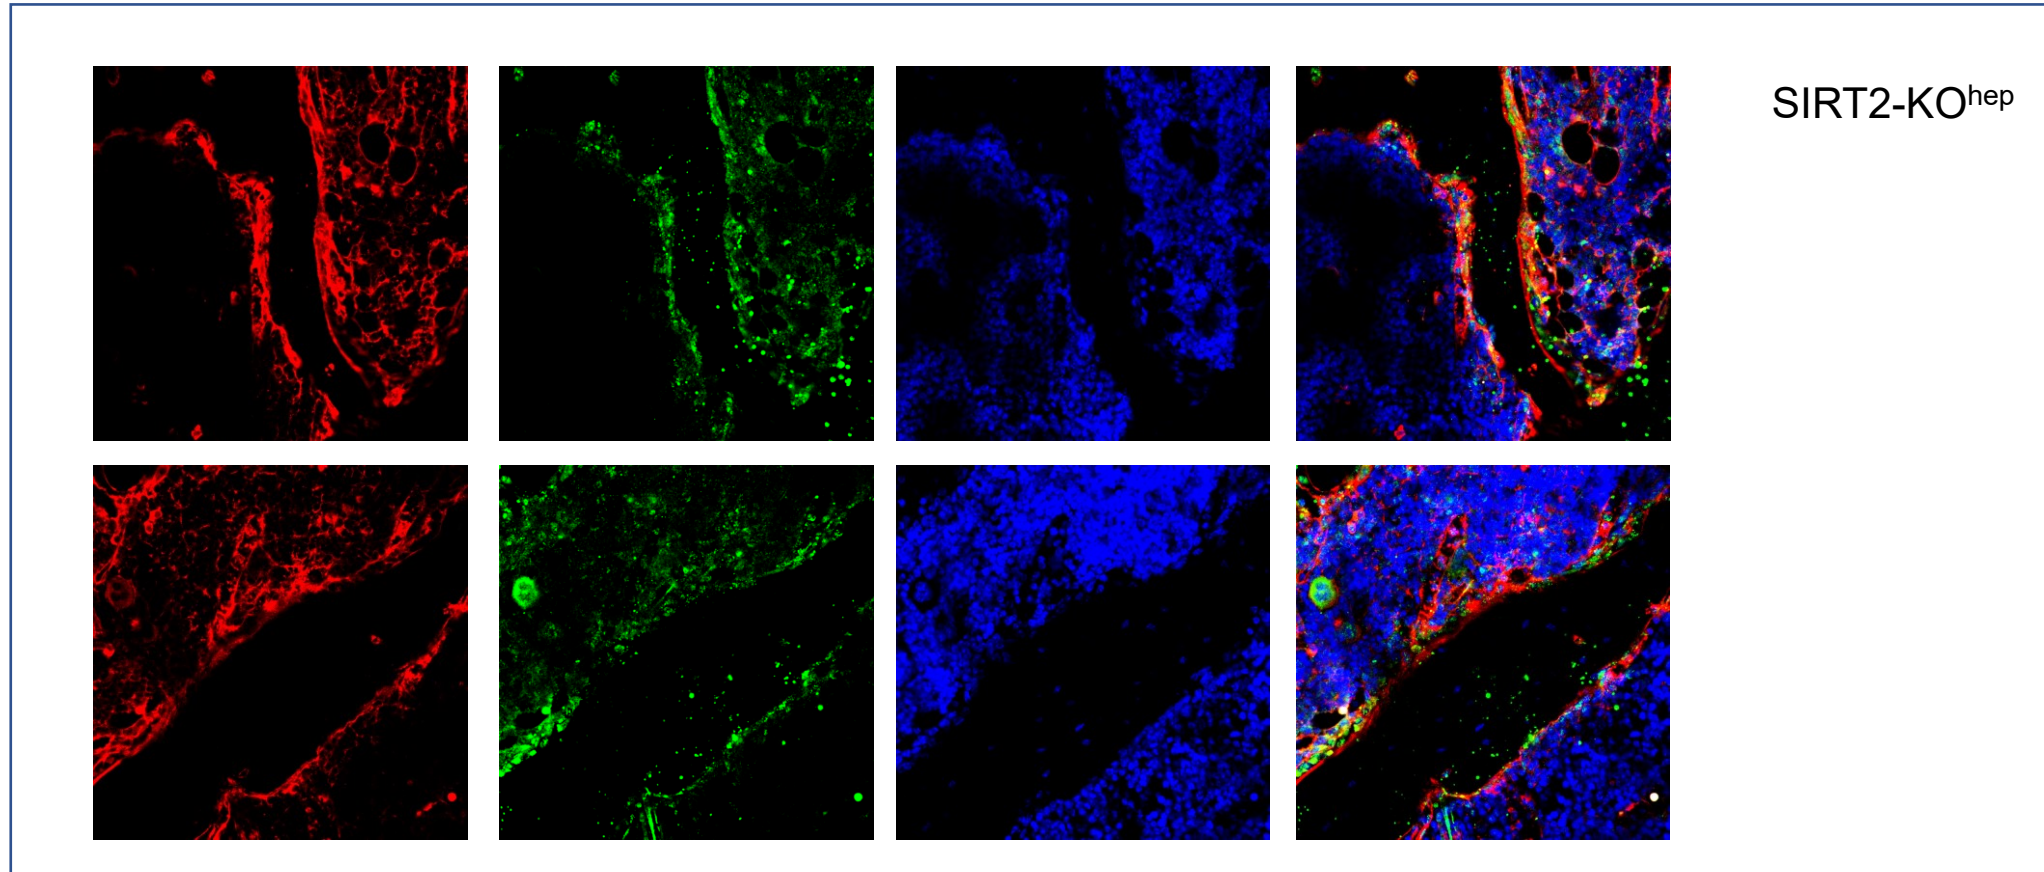

**Extended Data Fig.7d**

IHC detection of CD31 in the paraffin-embedded bone section of distal femur of aged mice

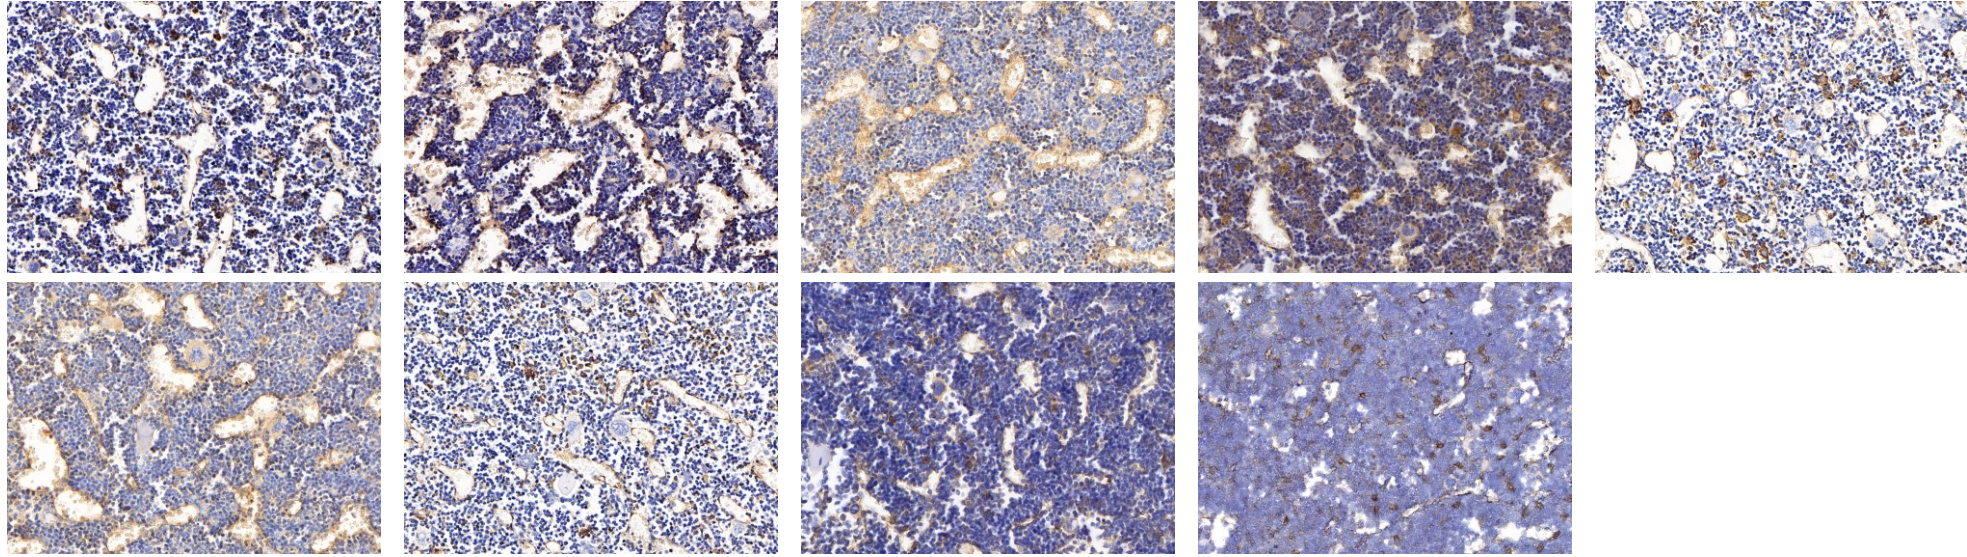

Loxp

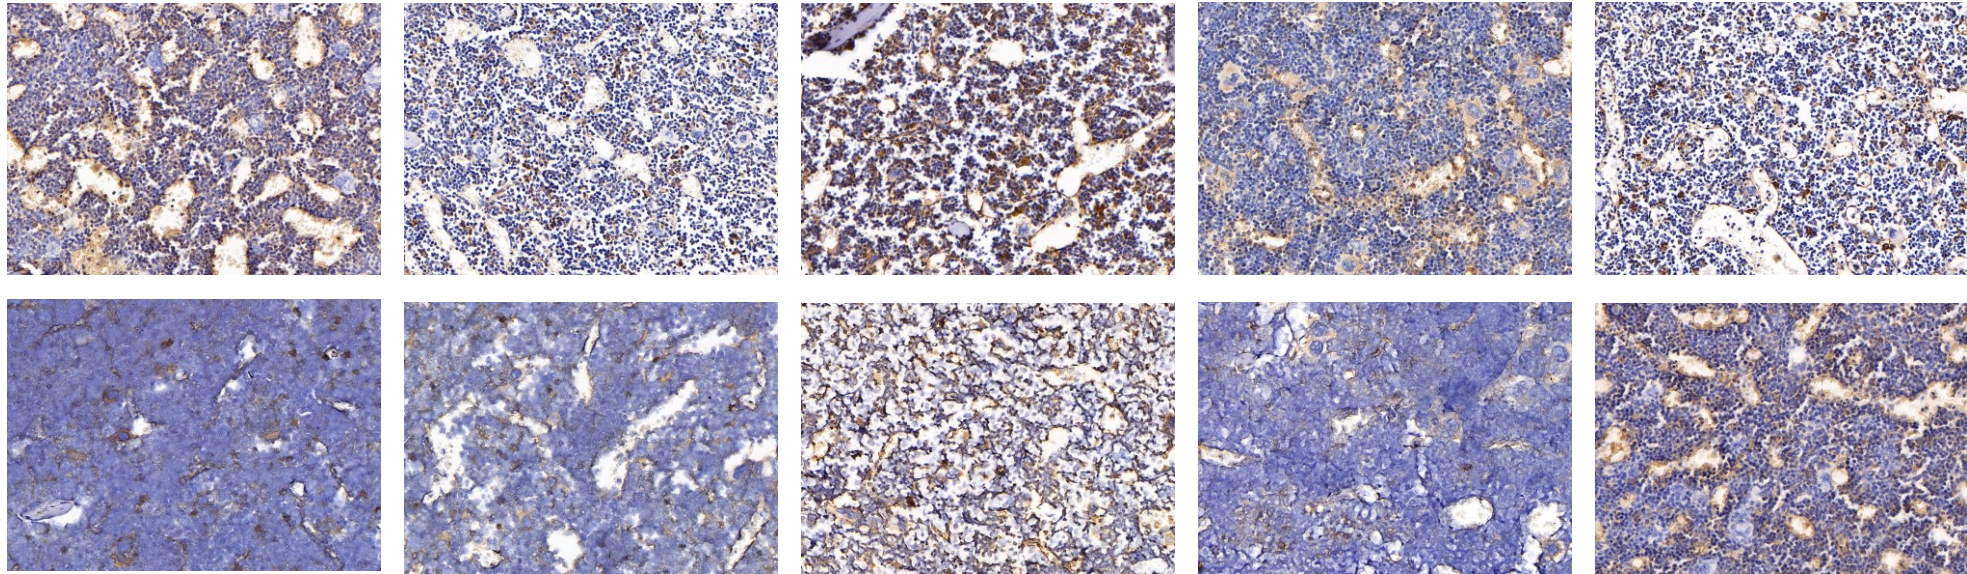

*SIRT2-KO*<sup>hep</sup>

**Extended data fig.8a**

TRAP staining images of BMDMs treated with RANKL and AGK2

Ctrl

AGK2

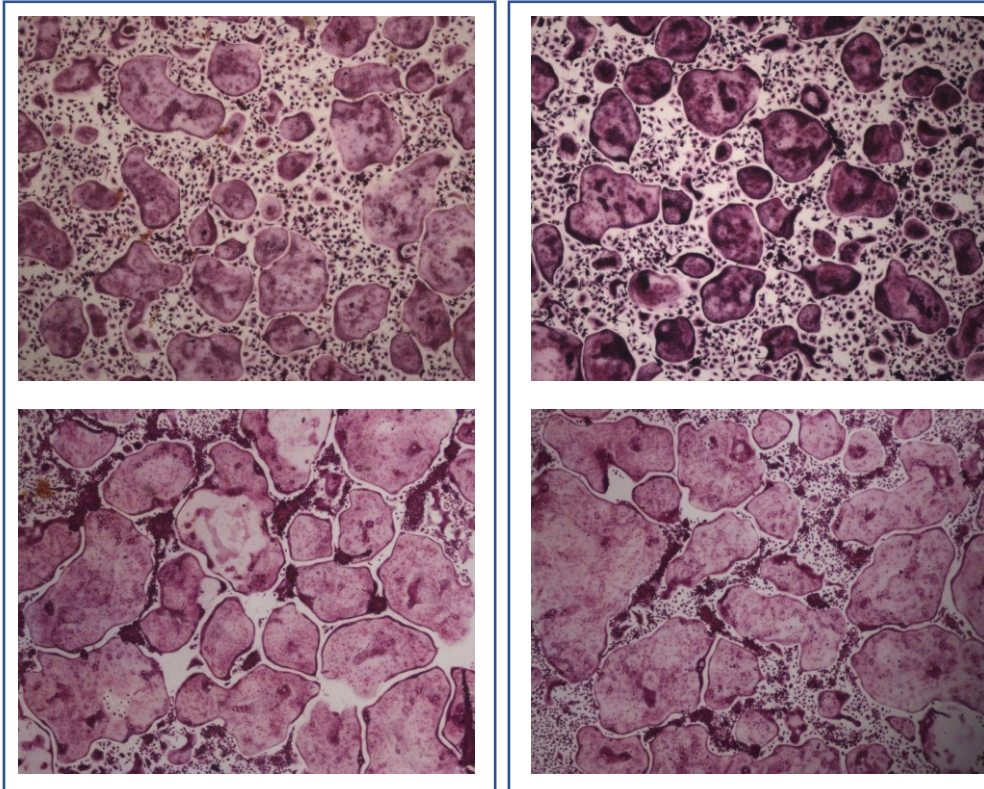

Extended data fig.9e

aged female mice loxp

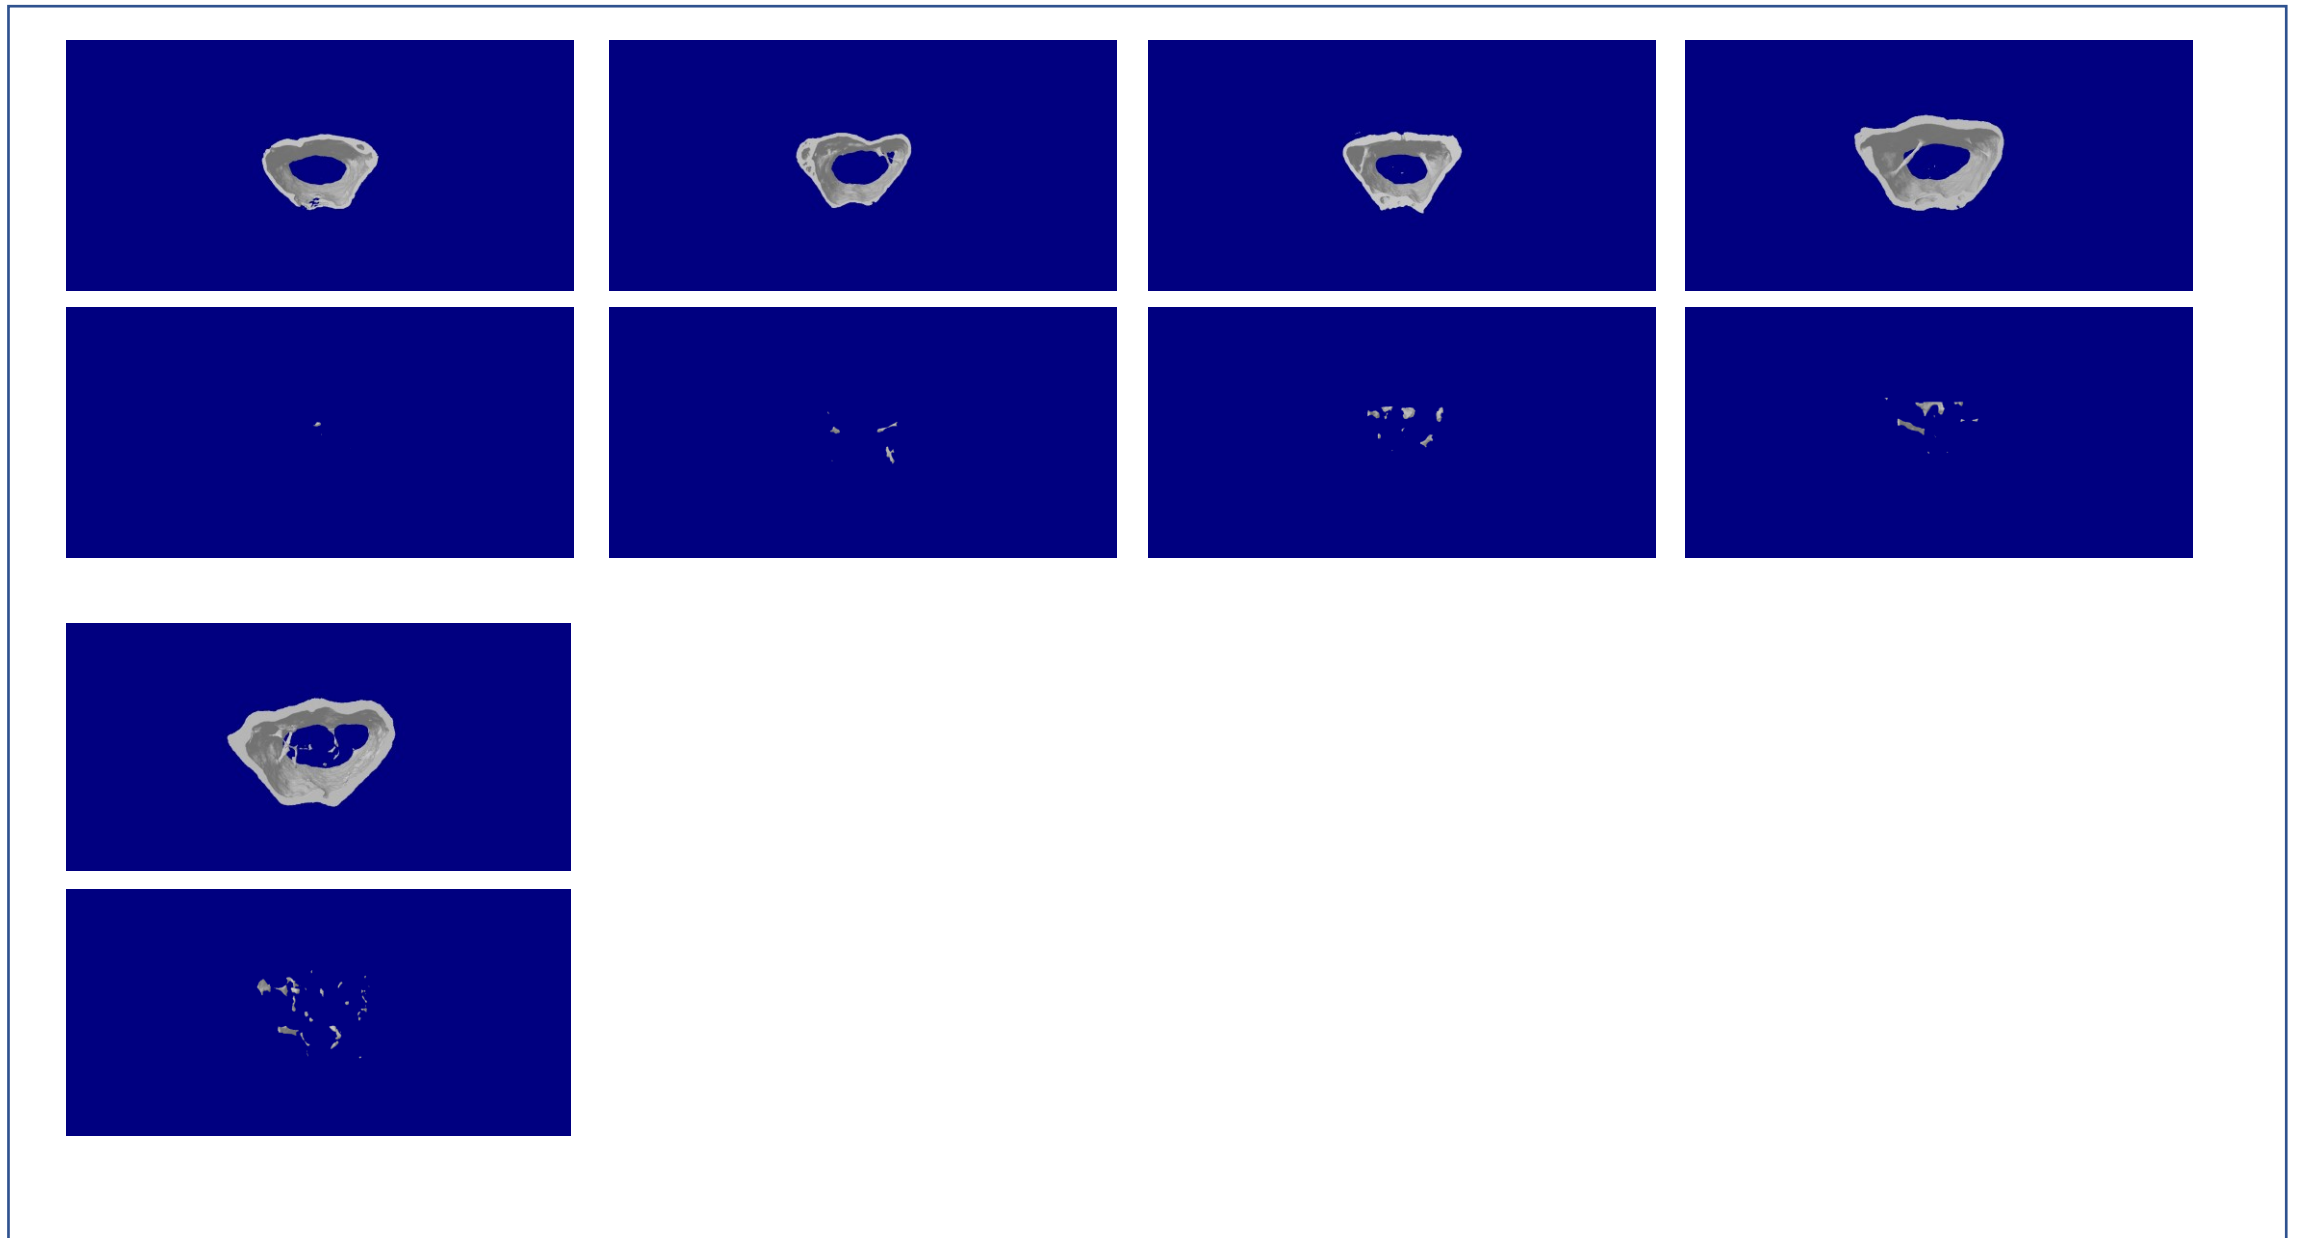

Extended data fig.9e

aged female mice SIRT2-KO<sup>lyz</sup>

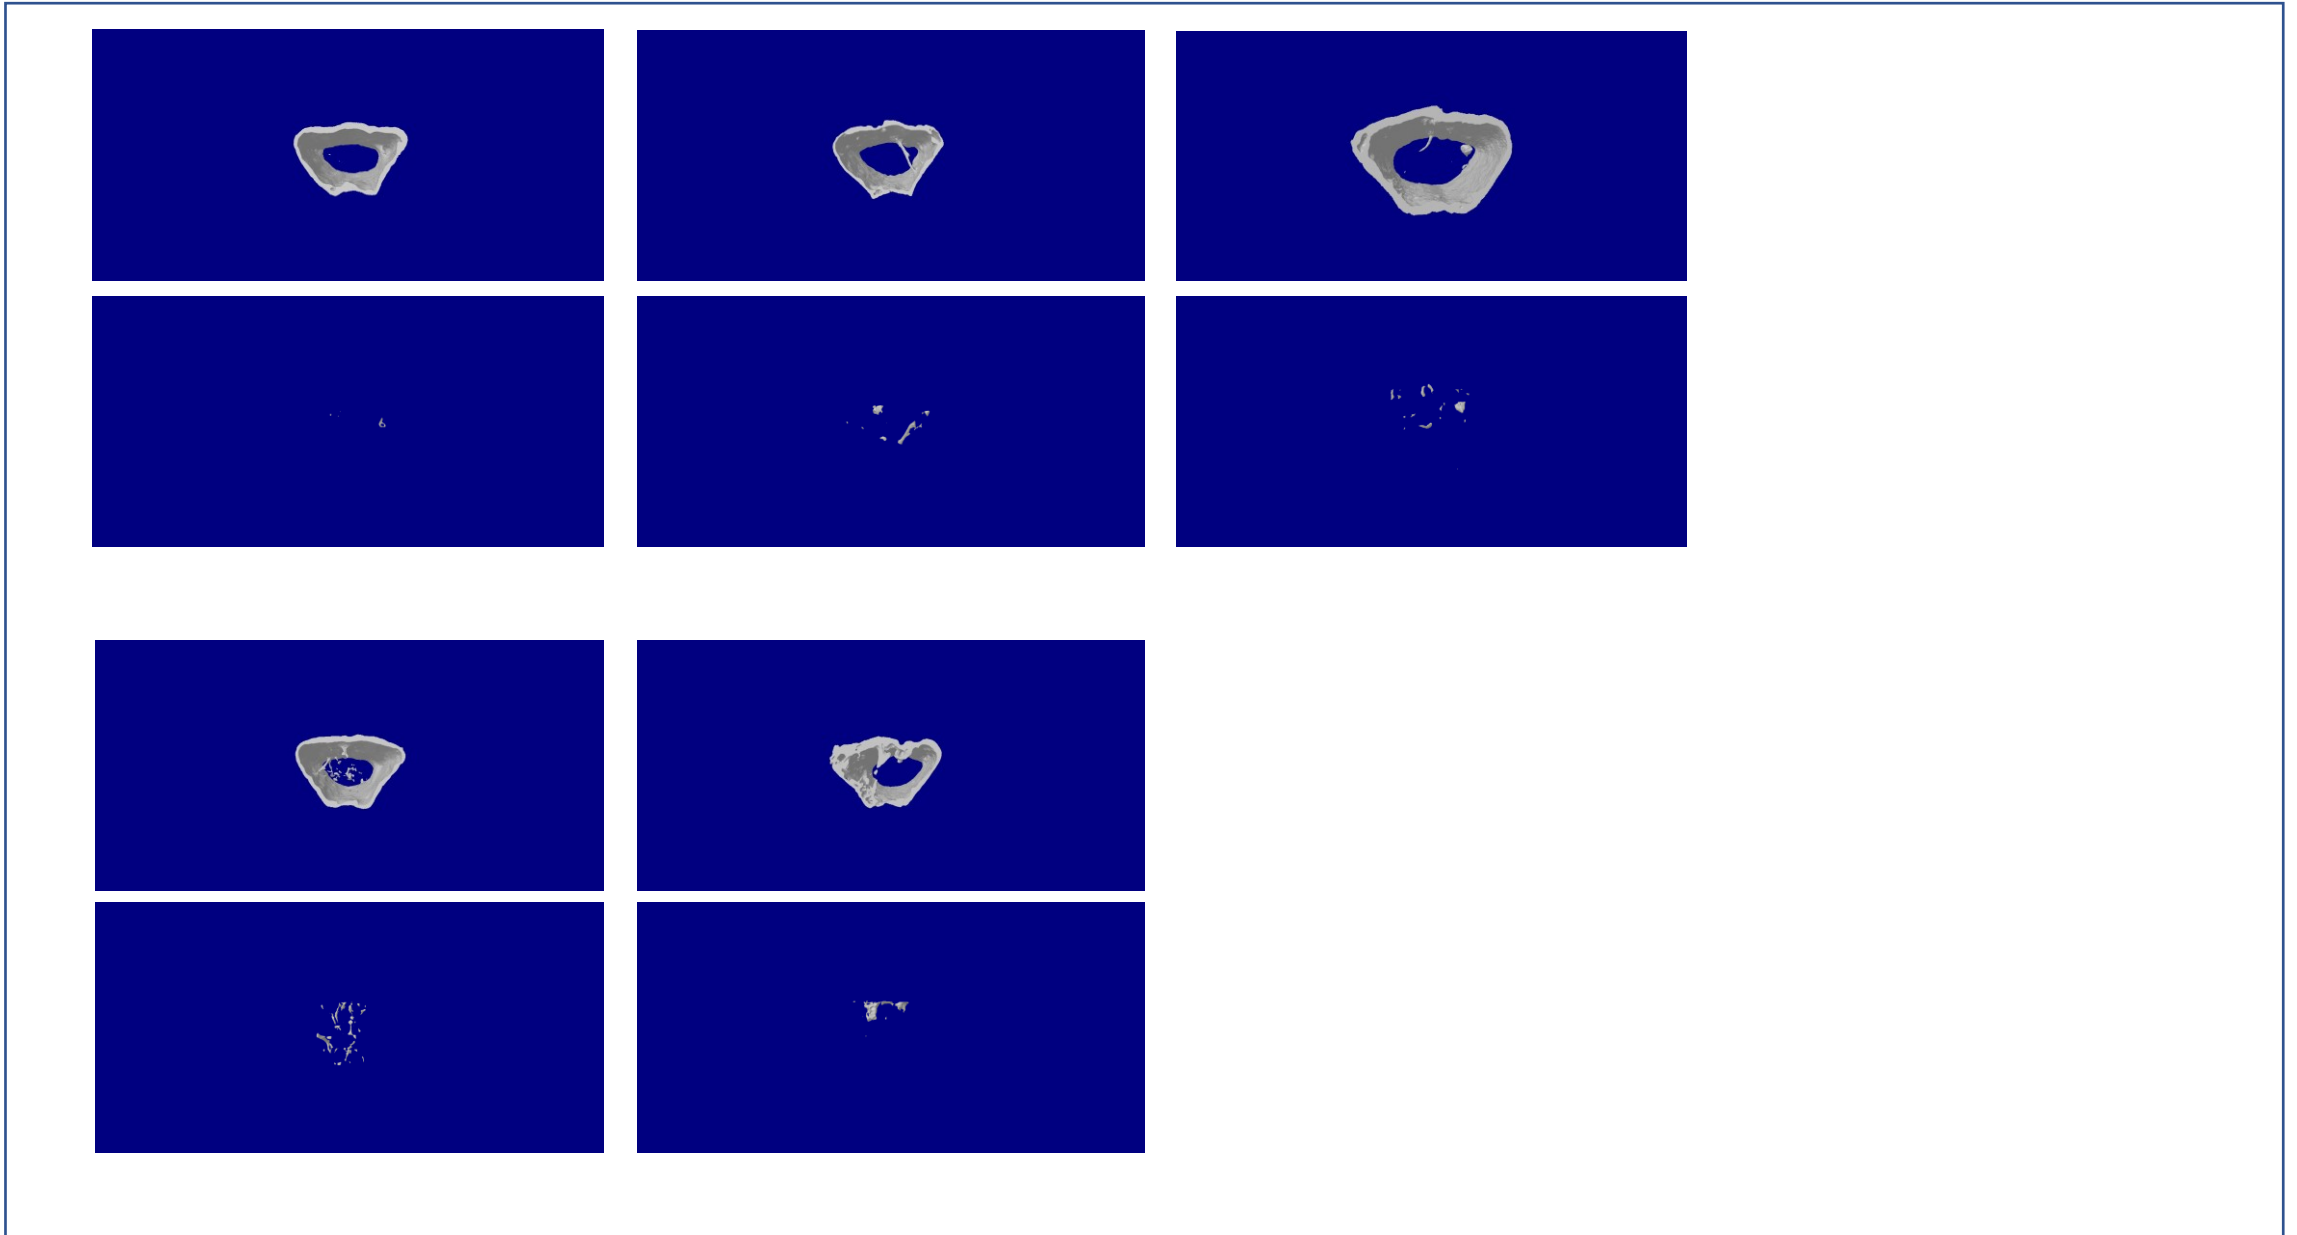

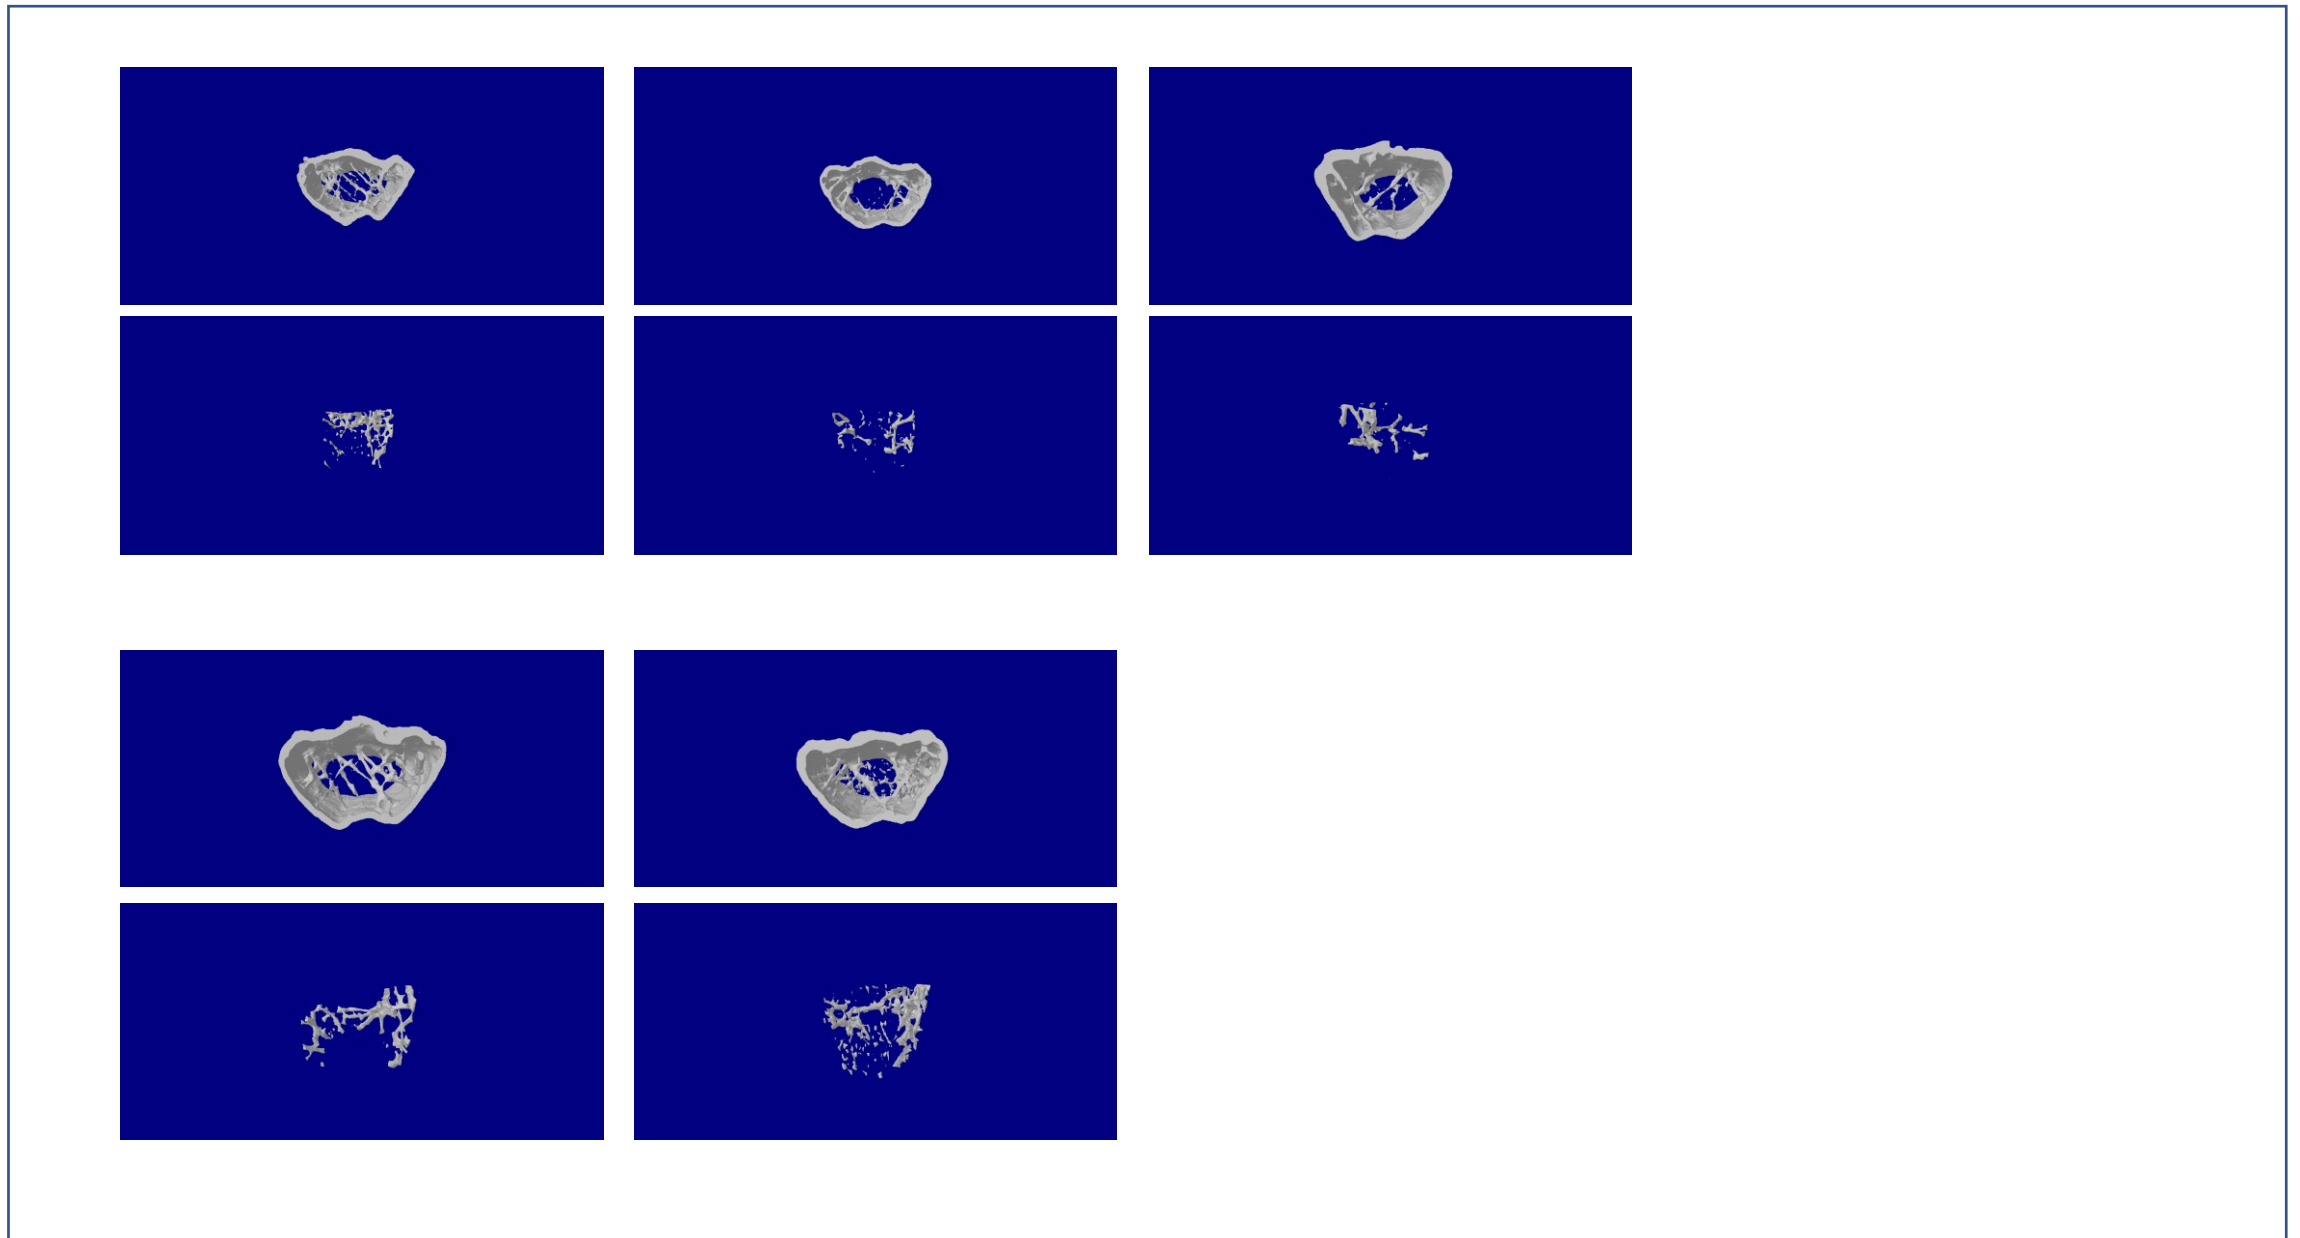



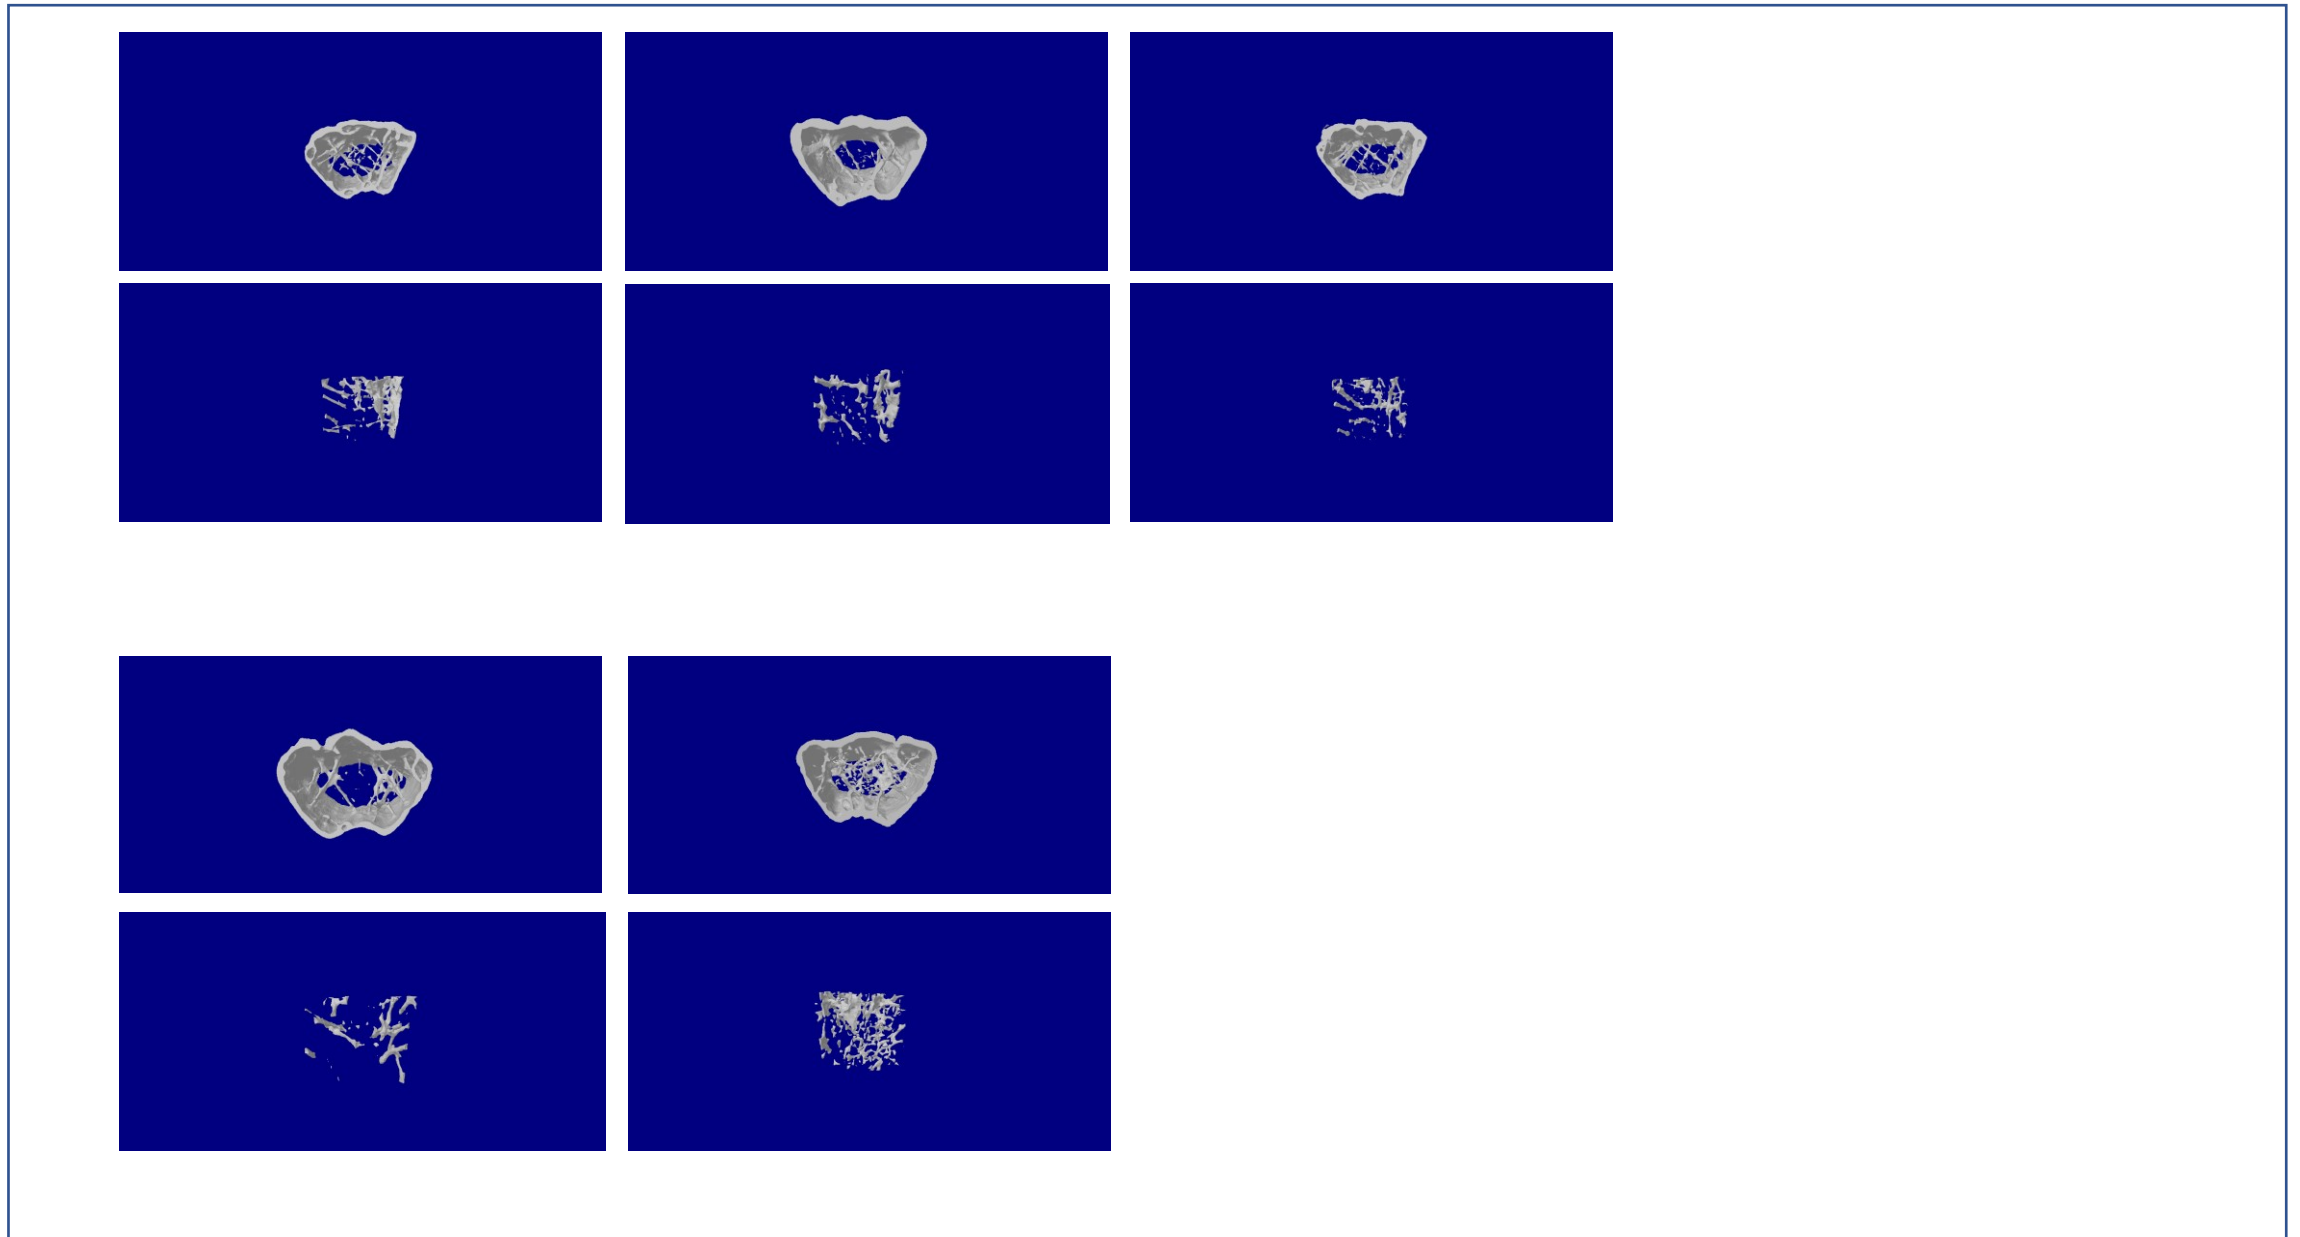

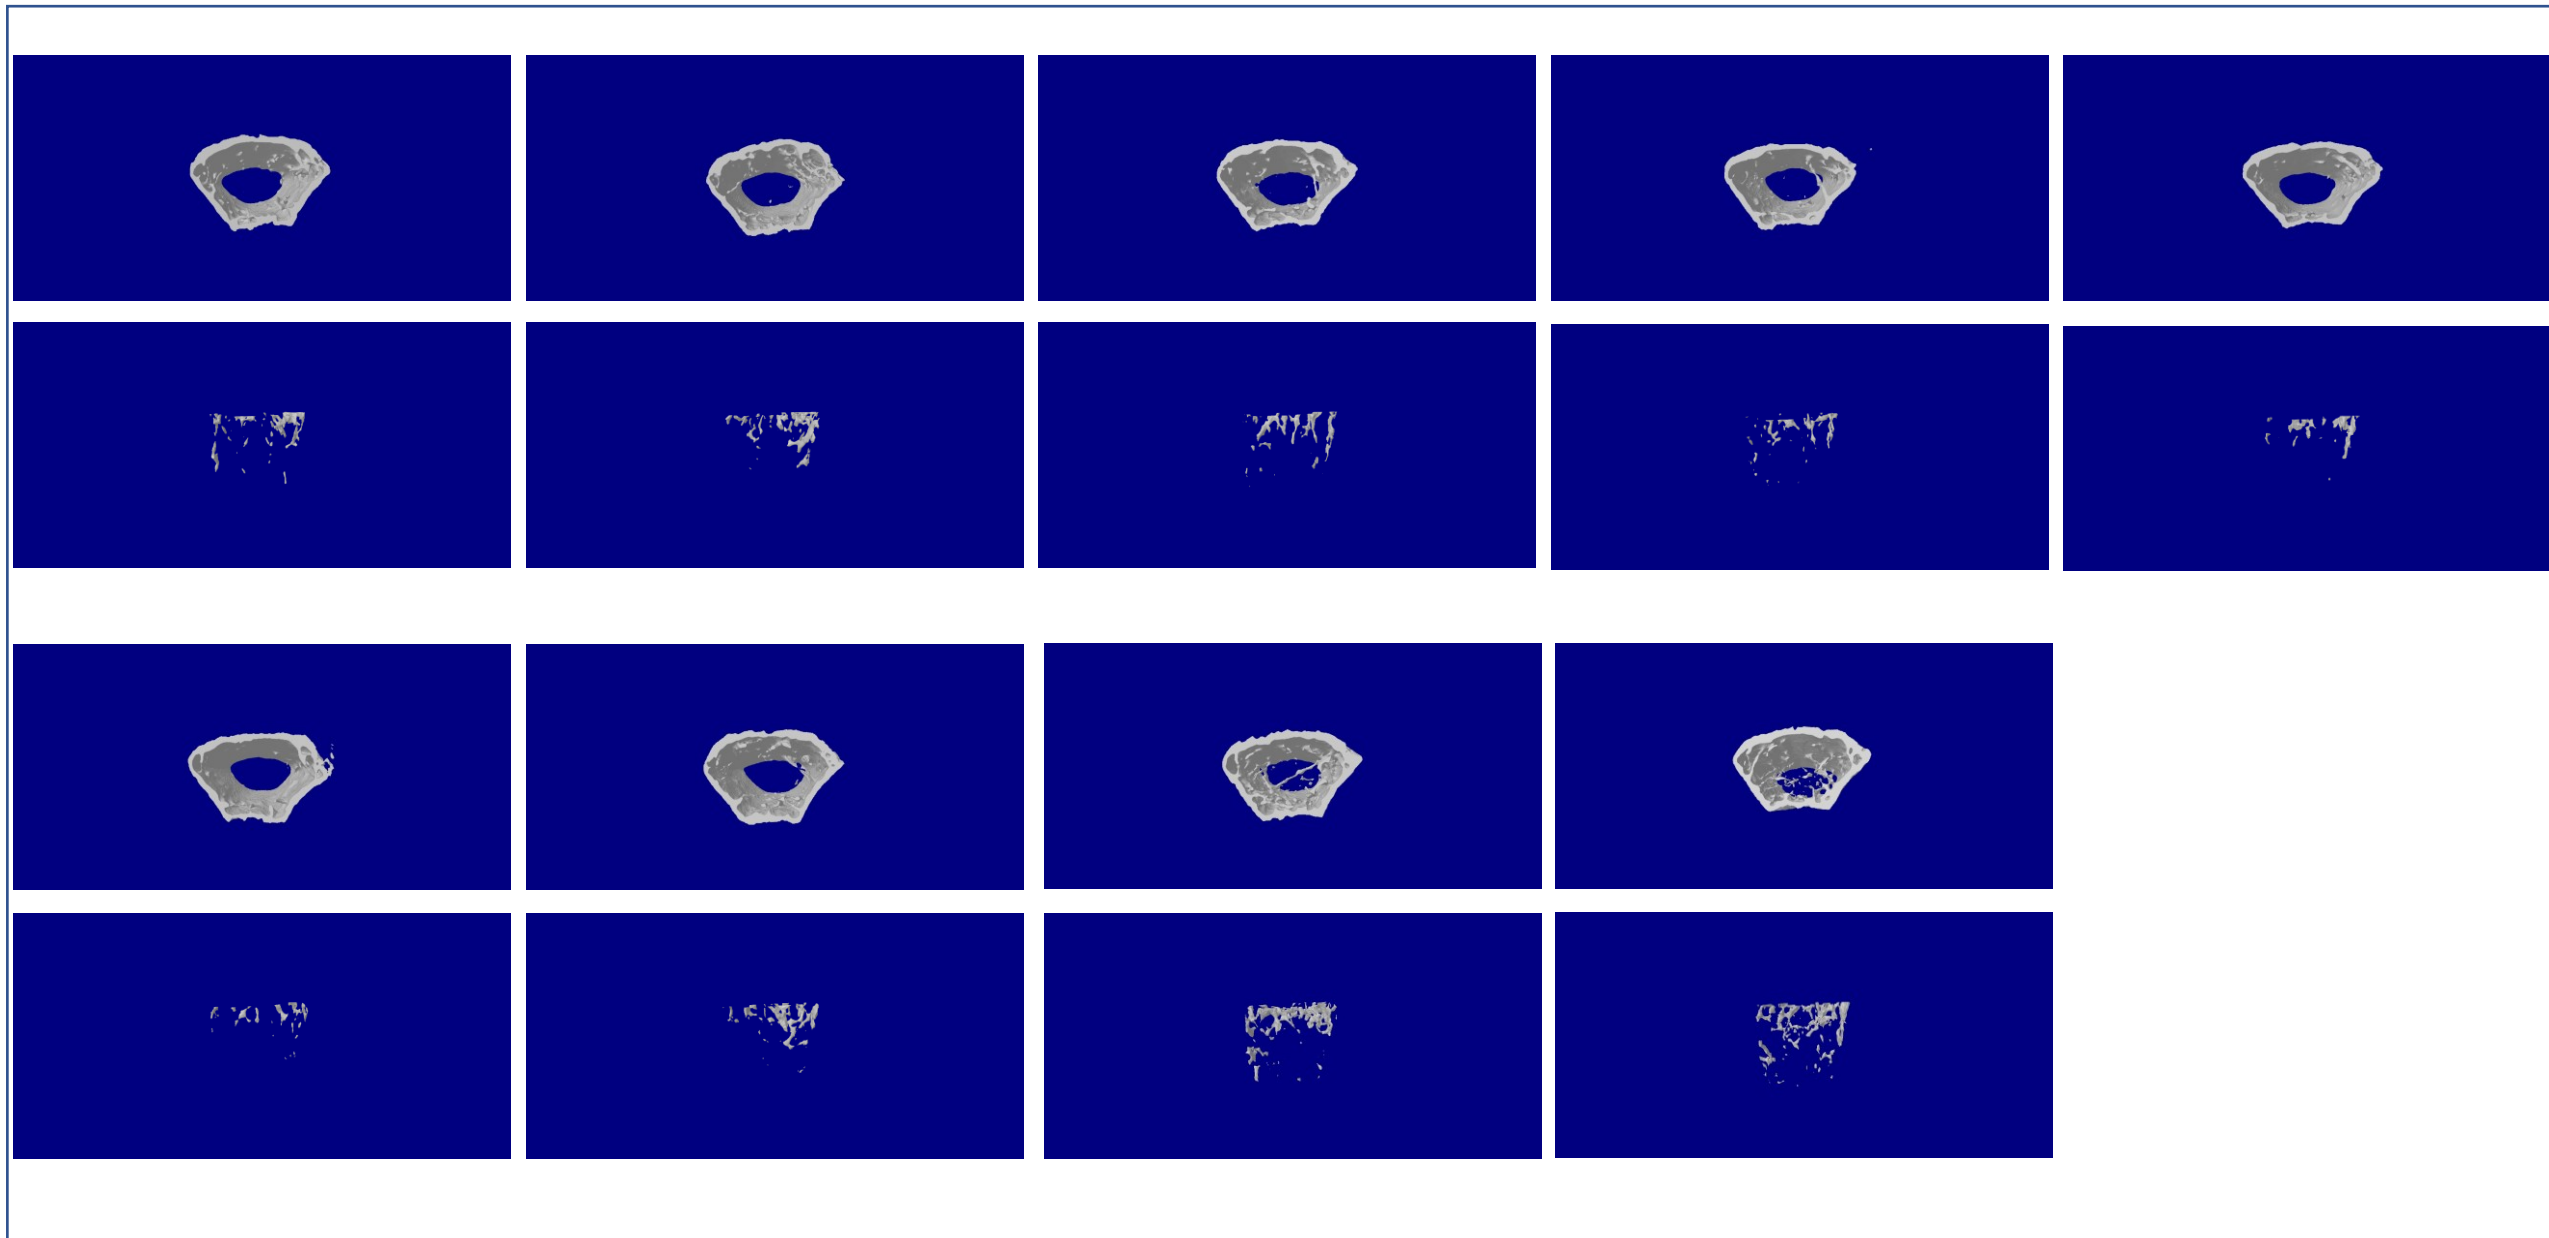

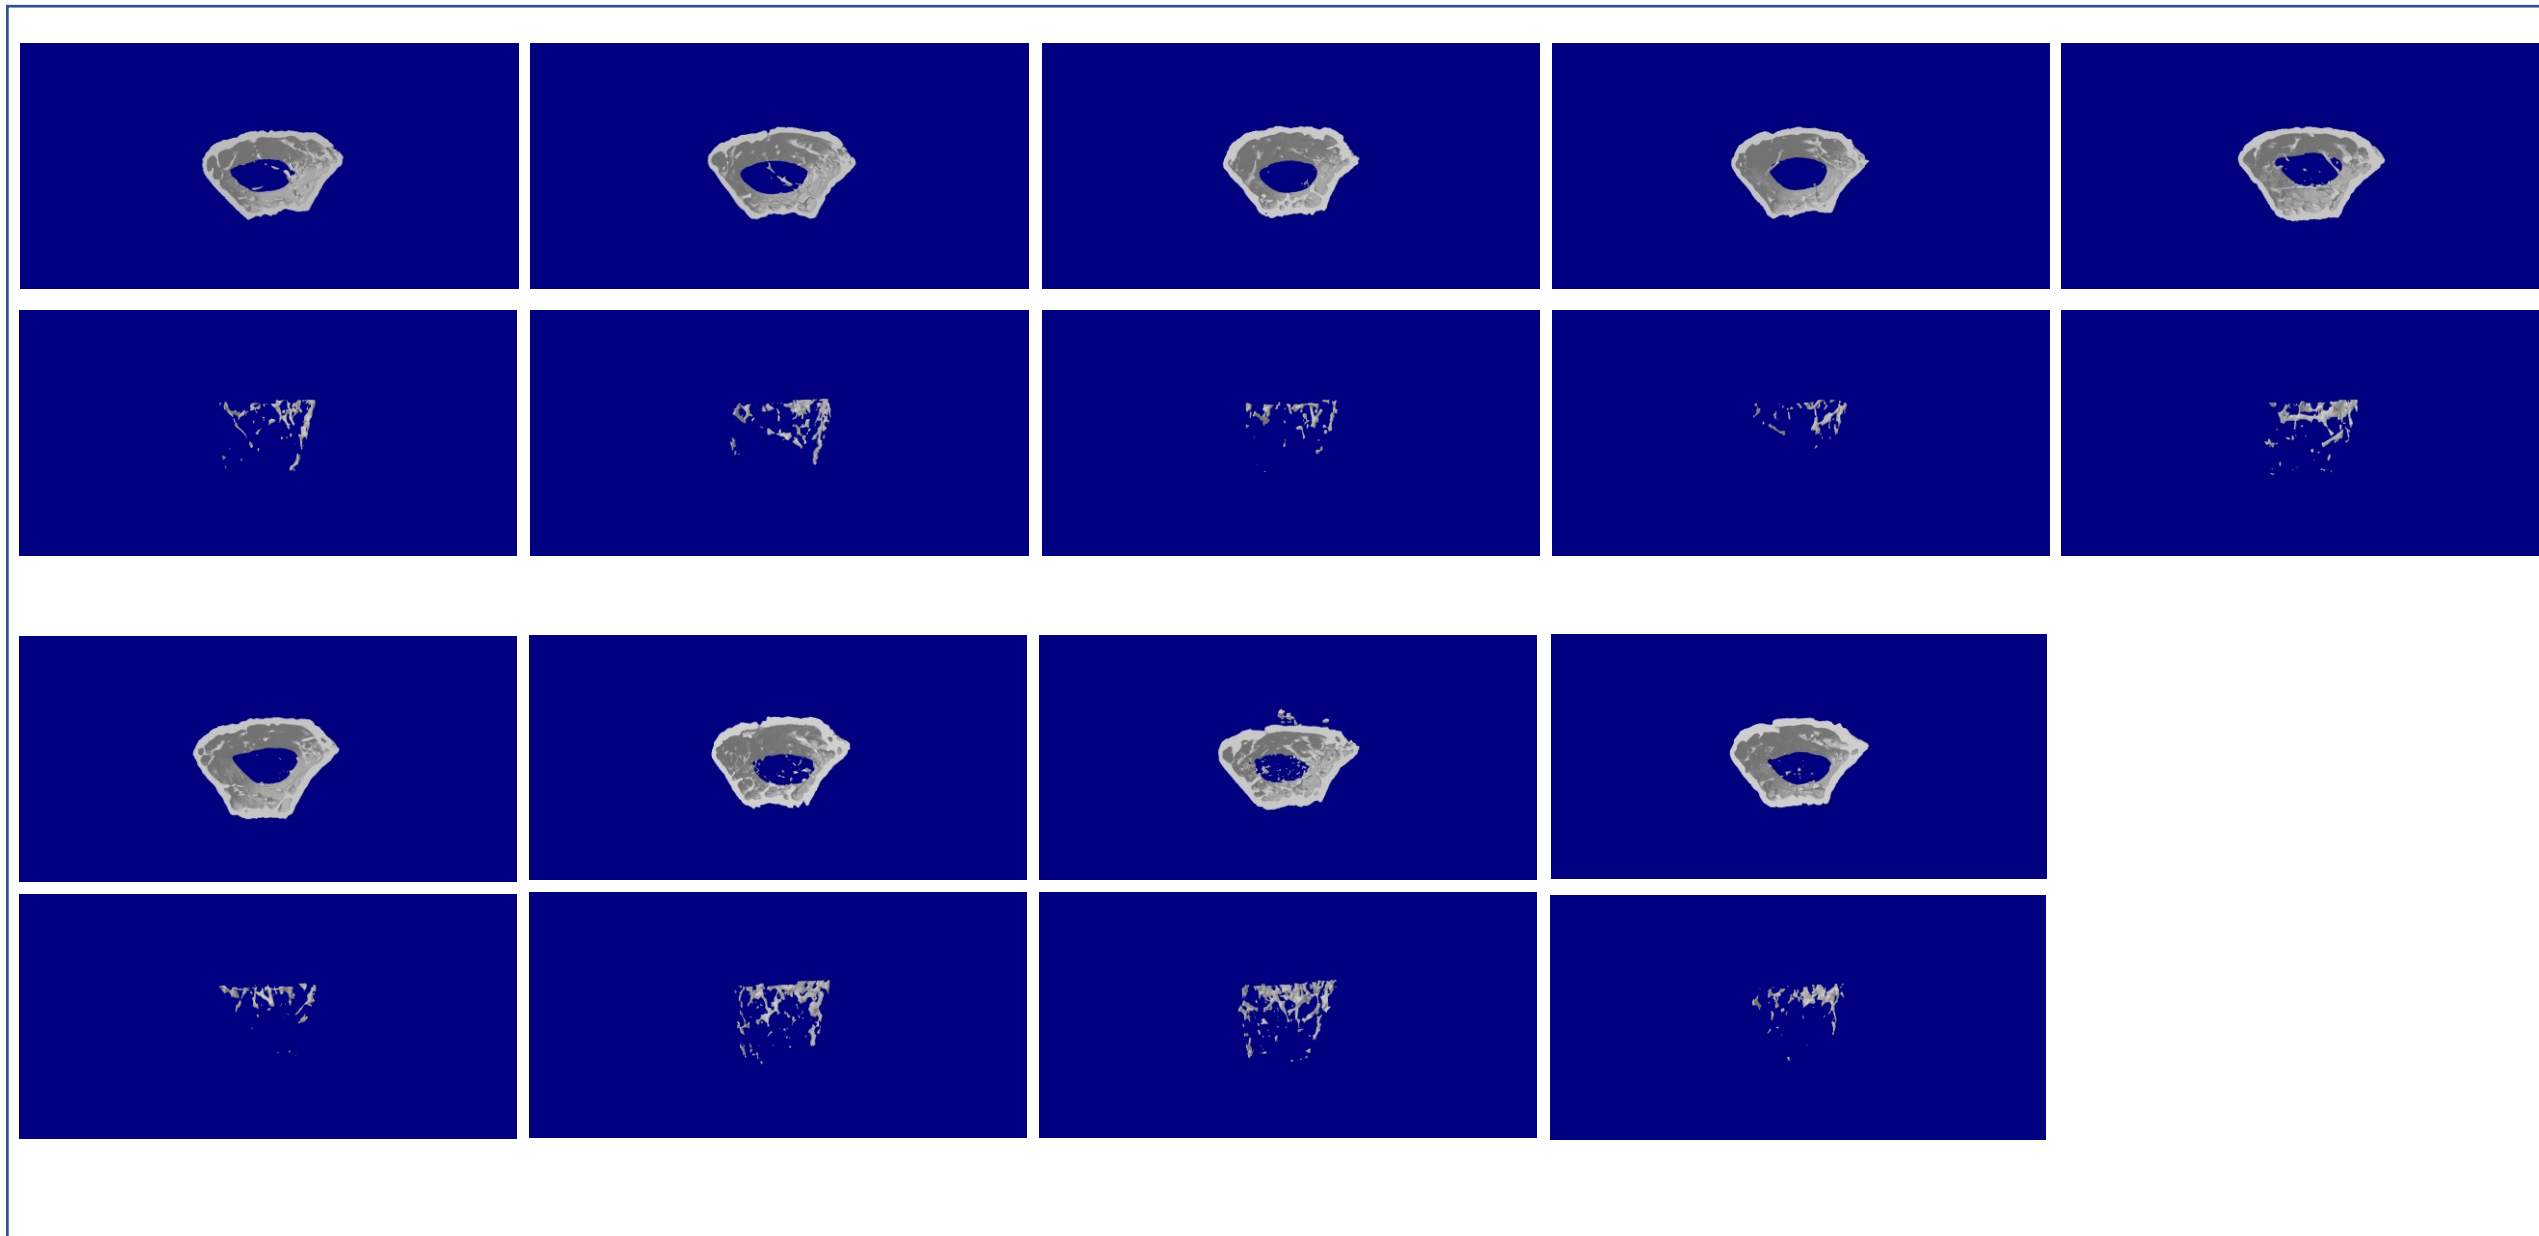

**Extended data fig.9k** BMDMs were isolated from LoxP and SIRT2-KOlyz mice and cultured with RANKL to generate osteoclasts.

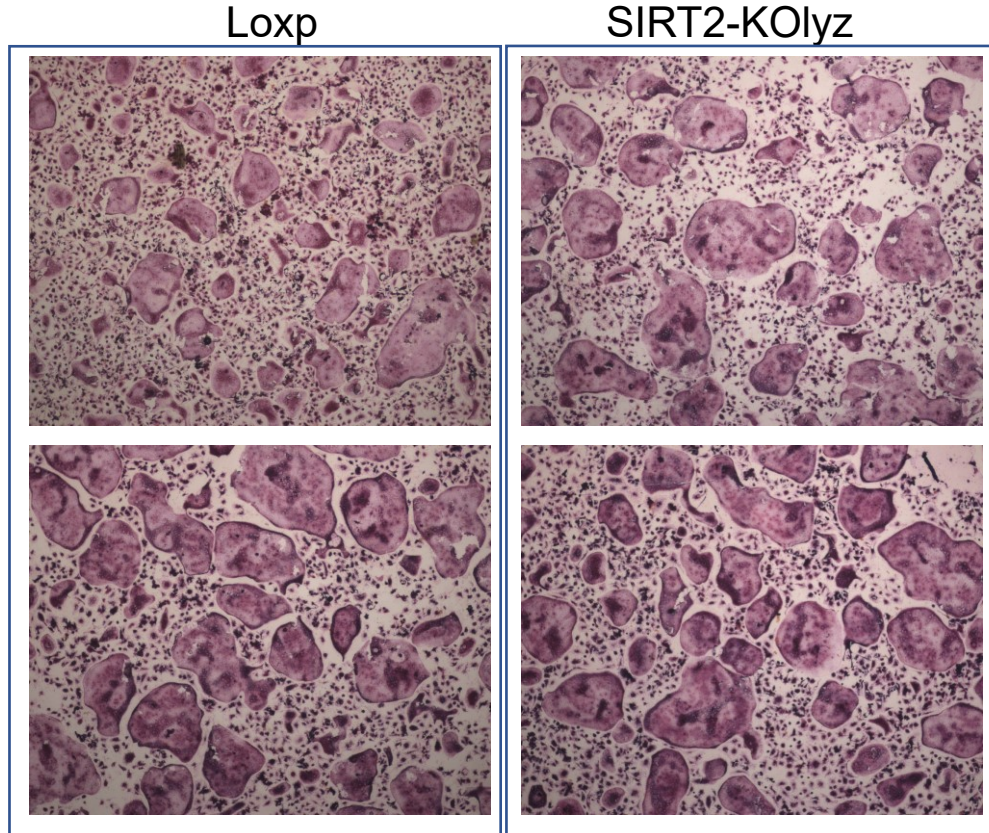

**Extended data fig.9n** BMDMs were isolated from LoxP and SIRT2-KOlyz mice and cultured with RANKL to generate osteoclasts.

Loxp

SIRT2-KOlyz

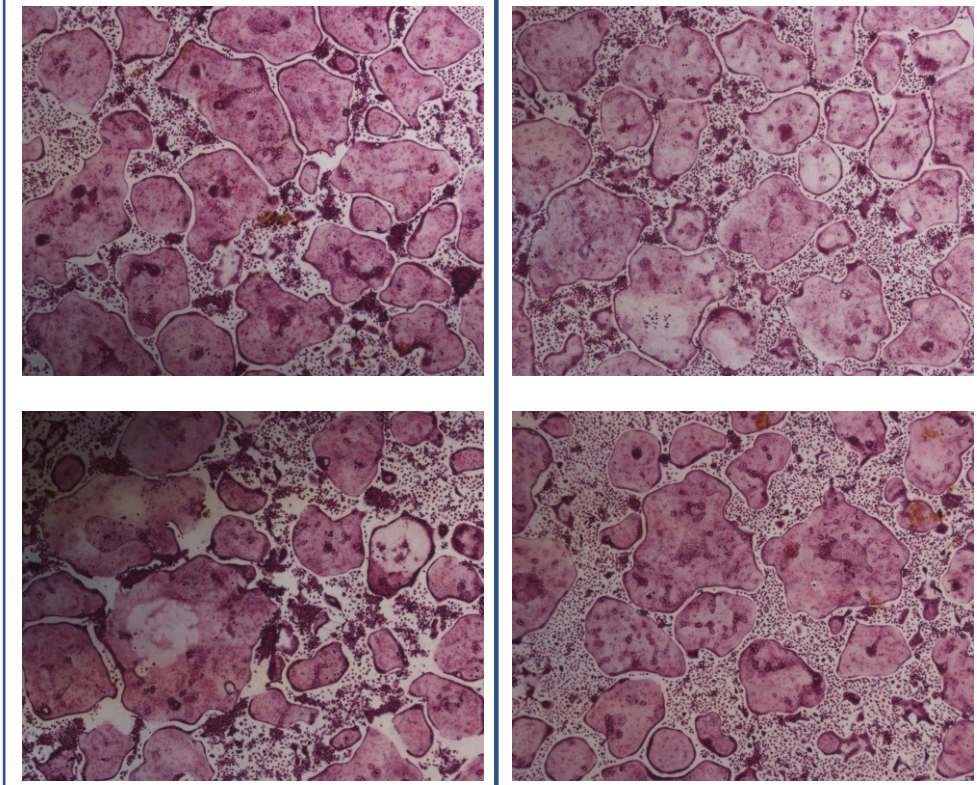

**Extended data fig.10**

TRAP staining images of human PBMCs cultured with RANKL and sEVs from HepG2 cells treated with control or AGK2

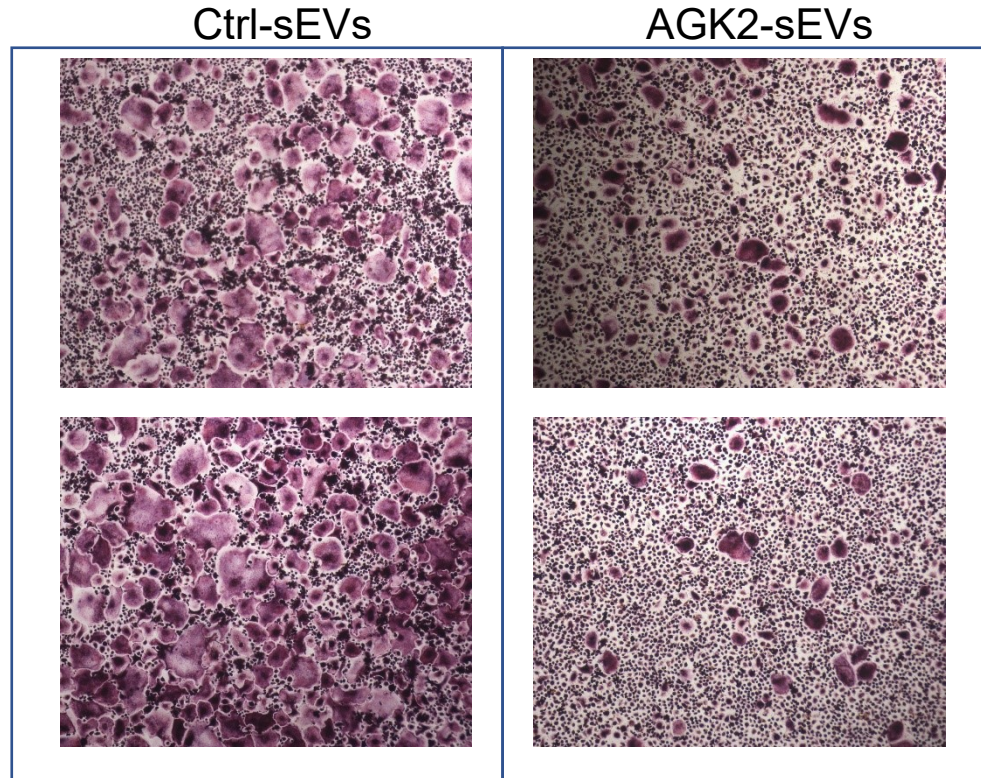

Supplement: 42255_2023_803_MOESM1_ESM.pdf [file 42255_2023_803_MOESM1_ESM.pdf]
