# Supplementary material for: SIRT2 regulates extracellular vesicle-mediated liver–bone communication
Source: PubMed Central journal article supplement (PMC10229428; doi:10.1038/s42255-023-00803-0), 2023-05-15
Supplement: 42255_2023_803_MOESM3_ESM.pdf [file 42255_2023_803_MOESM3_ESM.pdf]

## Supplementary Tables

### Supplementary Table S1.

The cDNA target sequences of shRNAs, and primer sequences used for cloning.

| Name                                | Species | Sequence (5'→3')                                                          |
|-------------------------------------|---------|---------------------------------------------------------------------------|
| The cDNA target sequences of shRNAs |         |                                                                           |
| shSIRT2-1                           | Mouse   | CCAACCATCTGCCACTACT                                                       |
| shSIRT2-2                           | Mouse   | AGCTGTTGGTGGATGAGCA                                                       |
| shLRG1                              | Mouse   | GGCCTACAGCACCTGGATA                                                       |
| shSIRT2-1                           | Human   | TGGACGAGCTGACCTTGGA                                                       |
| shSIRT2-2                           | Human   | AGCGCGTTTCTTCTCCTGT                                                       |
| Primers sequences used for cloning  |         |                                                                           |
| LRG1                                | Mouse   | Forward:<br>ATGGTCTCTTGGCAGCATC<br>A<br>Reverse:<br>T TACTTATCGTCGTCATCCT |

Supplementary Tables S2.

The primary antibodies used in Western blot analysis.

| Antibody         | Company name              | Dilution | Catalogue number |
|------------------|---------------------------|----------|------------------|
| TSG101           | Proteintech               | 1:1000   | 28283-1-AP       |
| HSP70            | Proteintech               | 1:1000   | 10995-1-AP       |
| Alix             | Proteintech               | 1:1000   | 12422-1-AP       |
| SIRT2            | Sigma                     | 1:500    | S8447            |
| LRG1             | Abcam                     | 1:250    | ab231188         |
| $\beta$ -tubulin | Proteintech               | 1:2000   | HRP-66240        |
| Anti-rabbit IgG  | Cell Signaling Technology | 1:5000   | #7074            |
| FLAG             | Sigma                     | 1:2500   | F1804            |
| Anti-mouse IgG   | Cell Signaling Technology | 1:5000   | #7076            |
| $\beta$ -actin   | MBL                       | 1:5000   | PM053-7          |
| Acetyl-H4K16     | Cell Signaling Technology | 1:1000   | #13534           |
| Histone H4       | Proteintech               | 1:500    | 16047-1-AP       |
| p-p65            | Cell Signaling Technology | 1:1000   | #3033            |
| p65              | Cell Signaling Technology | 1:1000   | #8242            |
| p-Smad2/3        | Cell Signaling Technology | 1:500    | #8828            |
| Smad2/3          | Cell Signaling Technology | 1:1000   | #8685            |
| p-Smad1/5        | Cell Signaling Technology | 1:500    | #9516            |
| Smad1            | Cell Signaling Technology | 1:1000   | #6944            |
| Smad5            | Cell Signaling Technology | 1:1000   | #12534           |
| Saa1/Saa2        | Abcam                     | 1:1000   | ab199030         |
| LaminB           | Santa Cruz                | 1:500    | sc6216           |
| anti-goat IgG    | Millipore                 | 1:2000   | AP106P           |

Supplementary Table S3.

Primers sequences used for real-time PCR.

| Name        | Species | Sequence (5'->3')                                                      |
|-------------|---------|------------------------------------------------------------------------|
| RPL13A      | Mouse   | Forward: GAGGTCGGGTGGAAGTACCA<br>Reverse: TGCATCTTGGCCTTTTCCTT         |
| LRG1        | Mouse   | Forward: CCATGTCAGTGTGCAGATTC<br>Reverse: AAGAGTGAGAGGTGGAAGAG         |
| Runx2       | Mouse   | Forward: GCATGGTGGAGGTACTAGCTG<br>Reverse: GCCGTCCACTGTGATTTTG         |
| Sp7         | Mouse   | Forward: ATGGCGTCCTCTCTGCTTG<br>Reverse: TGAAAGGTCAGCGTATGGCTT         |
| ALP         | Mouse   | Forward: ATCTTTGGTCTGGCTCCCATG<br>Reverse: TTTCCCGTTCACCGTCCAC         |
| Osteocalcin | Mouse   | Forward:<br>GCAATAAGGTAGTGAACAGACTCC<br>Reverse: GTTTGTAGGCGGTCTTCAAGC |
| GAPDH       | Mouse   | Forward: ACTGAGGACCAGGTTGTC<br>Reverse: TGCTGTAGCCGTATTCATTG           |
| NFATc1      | Mouse   | Forward: GGAGAGTCCGAGAATCGAGAT<br>Reverse: TTGCAGCTAGGAAGTACGTCT       |
| CathespinK  | Mouse   | Forward: GGAGTTGACTTCCGCAATCCT<br>Reverse: ACTTGAACACCCACATCCTGC       |
| Acp5        | Mouse   | Forward: AGCAGCTCCCTAGAAGATGGA<br>Reverse: AGCCACAAATCTCAGGGTGG        |
| DC-STAMP    | Mouse   | Forward: CCGTGAAGGTAGGAACGCTT<br>Reverse: AGATTCAGCGGAGTGGCAAG         |
| CYP2R1      | Mouse   | Forward: TCAACTGTCGTTCTAAATGGCT<br>Reverse: TCTGGAATTGAGTAAGCCTCCC     |
| CYP27A1     | Mouse   | Forward: TCCAGGCACAGGAGAGTACG                                          |

|        |       |                                                                   |
|--------|-------|-------------------------------------------------------------------|
|        |       | Reverse: TACTTGGTCTTG TTCAGCACCTGG                                |
| NFATc1 | Human | Forward: CCAGTCCCTTCCAAGTTTCCA<br>Reverse: GCATAGCCATAGTGTTCTTCCT |
| CTSK   | Human | Forward: TTCCCGCAGTAATGACACCC<br>Reverse: GGAACCACACTGACCCTGAT    |
| ITGB3  | Human | Forward: TGGTAGAAGAGCCAGAGTGTC<br>Reverse: TACAGTGGGTTGTTGGCTGT   |
| CALCR  | Human | Forward: CCCAGGATGCAATTTTCTGG<br>Reverse: AGAATTGGGGTTGGGTGATTTAG |
| GAPDH  | Human | Forward: TCGGAGTCAACGGATTTGGT<br>Reverse: TTCCCGTTCTCAGCCTTGAC    |

---

Supplementary Table S4.

Primers sequences used for CHIP.

| Name                  | Species | Sequence (5'→3')                                                     |
|-----------------------|---------|----------------------------------------------------------------------|
| LRG1-chip-primer<br>1 | Mouse   | Forward:<br>CAGACCTGGCACCAAGCTAA<br>Reverse: GCAGGCCTGAATCTGTTCCT    |
| LRG1-chip-primer<br>2 | Mouse   | Forward: ACACTGTCCATCTGTCTGGTG<br>Reverse:<br>GAGAGCATTGCGGGTCAGAT   |
| LRG1-chip-primer<br>3 | Mouse   | Forward: TAACTCTCTGTCCAGCACGC<br>Reverse:<br>TTGTGGGAGATGTCGAAGCC    |
| LRG1-chip-primer<br>4 | Mouse   | Forward:<br>CGCCAACCGAAACAAGATGT<br>Reverse:<br>TGACATGGGACCACATTGGC |
| LRG1-chip-primer<br>5 | Mouse   | Forward:<br>GGGCCTACAGCACCTGGATA<br>Reverse:<br>GAGATGTCGAAGCCGTCCTG |

Supplementary Table S5.

Characteristics of the female osteoporotic patients (related to Fig. 7n,o).

| Characteristics      | Women               |                       | p    |
|----------------------|---------------------|-----------------------|------|
|                      | Normal Control      | Osteoporotic patients |      |
|                      | (n=28)              | (n=25)                |      |
| Age (years)          | 64.3 (60.0-70.0)    | 65.2 (61.0-70.0)      | 0.25 |
| $\beta$ -CTX (pg/ml) | 400.99(263.0-564.0) | 437.55(203.0-693.0)   | 0.23 |
| PINP (ng/ml)         | 20.03(10.21-30.22)  | 22.57(13.2-32.87)     | 0.08 |
| BALP (ug/l)          | 12.55(4.92-21.51)   | 13.05(4.68-19.35)     | 0.67 |

Characteristics of the study population (related to Fig. 7p-s).

| Characteristics      | Sex                 |                     | p     |
|----------------------|---------------------|---------------------|-------|
|                      | Men (n=36)          | Women (n=84)        |       |
|                      | Age (years)         | 65.3 (60.0-70.0)    |       |
| $\beta$ -CTX (pg/ml) | 397.61(167.0-856.7) | 457.52(203.0-793.0) | 0.04  |
| PINP (ng/ml)         | 22.29(12.40-33.0)   | 22.02(10.21-39.26)  | 0.81  |
| BALP (ug/l)          | 10.08(4.34-19.3)    | 12.93(4.68-26.25)   | <0.01 |

$\beta$ -CTX, type 1 collagen carboxyl terminal peptide; PINP, type 1 procollagen amino terminal peptide; BALP, bone-specific alkaline phosphatase.
